# Supplementary material for: Supplementary Low Far-Red Light Promotes Proliferation and Photosynthetic Capacity of Blueberry In Vitro Plantlets
Source: MDPI journal article supplement (doi:10.3390/ijms25020688), 2024-01-05
Supplement: s1 [file s1]

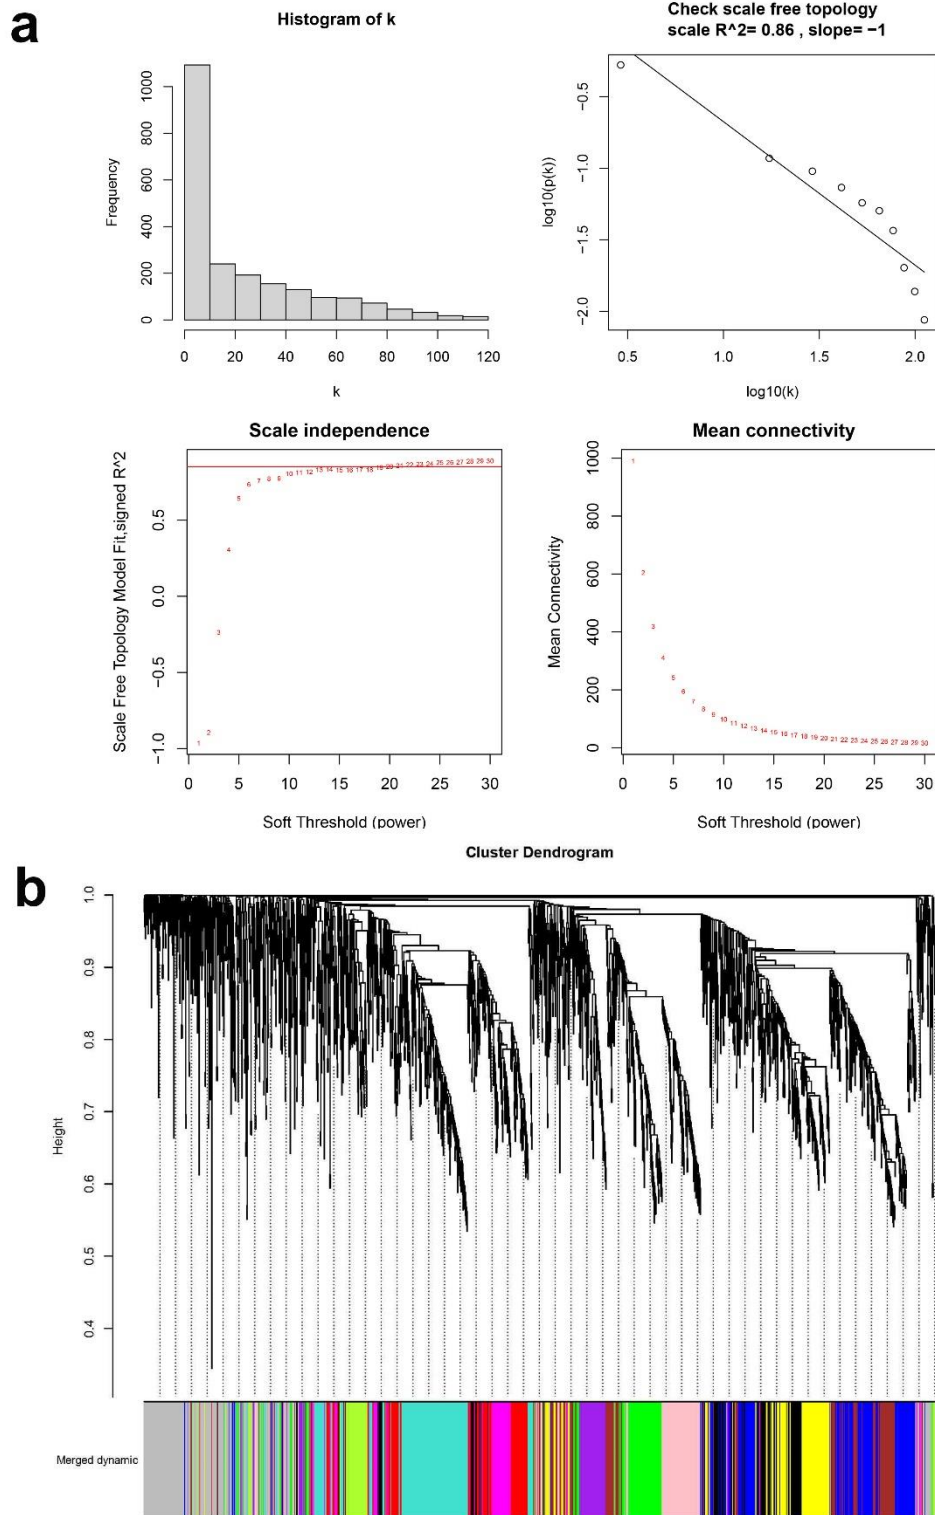

**Figure S1.** (a) Histogram of  $k$ , scale free topology scale, soft threshold and mean connectivity (b) Stem differential genes clustered based on a dissimilarity measure (1-TOM)
