# Supplementary material for: Supplementary Low Far-Red Light Promotes Proliferation and Photosynthetic Capacity of Blueberry In Vitro Plantlets
Source: Int J Mol Sci. 2024 Jan 5;25(2):688. doi: 10.3390/ijms25020688 (PMC10815622; doi:10.3390/ijms25020688)
Supplement: Supplementary file 1 [file ijms-25-00688-s001.zip]

Archive with 14 entries (14 files):
- Supplementary Materials/Figure S1.pdf
- Supplementary Materials/Figure S2.pdf
- Supplementary Materials/Table S1 Sequencing quality.xlsx
- Supplementary Materials/Table S10 leaf_yellow_GO.xls
- Supplementary Materials/Table S11 leaf_yellow_go_predictions.xlsx
- Supplementary Materials/Table S12 phenotypic data for WGCNA.xlsx
- Supplementary Materials/Table S2 stem_blue_GO.xls
- Supplementary Materials/Table S3 stem_blue_go_predictions.xlsx
- Supplementary Materials/Table S4 stem_yellow_GO.xls
- Supplementary Materials/Table S5 stem yellow_go_predictions.xlsx
- Supplementary Materials/Table S6 stem_brown_GO.xls
- Supplementary Materials/Table S7 stem_brown_go_predictions.xlsx
- Supplementary Materials/Table S8 leaf_magenta_GO.xls
- Supplementary Materials/Table S9 leaf_magenta_go_predictions.xlsx
