# Supplementary material for: Supplementary Low Far-Red Light Promotes Proliferation and Photosynthetic Capacity of Blueberry In Vitro Plantlets
Source: Int J Mol Sci. 2024 Jan 5;25(2):688. doi: 10.3390/ijms25020688 (PMC10815622; doi:10.3390/ijms25020688)
Supplement: Supplementary file 1 [file ijms-25-00688-s001.zip › Supplementary Materials/Table S1 Sequencing quality.xlsx]

## Sheet: Sheet1
Sample	Total Reads	total bases	BF_Q20	BF_Q20(%)	BF_Q30	BF_Q30(%)
LCK-1	37057036	2779277700	2707176337	97.4058	2.58763e+09	93.1044
LCK-2	52367162	3927537150	3.80921e+09	96.9871	3.6197e+09	92.1622
LCK-3	37428668	2807150100	2.73717e+09	97.5071	2616731630	93.2167
L6FR-1	36939580	2770468500	2.70096e+09	97.4911	2583765632	93.261
L6FR-2	52182430	3913682250	3811334453	97.3849	3640355310	93.0161
L6FR-3	52180692	3913551900	3790226165	96.8488	3595861191	91.8823
L30FR-1	52403854	3930289050	3.82701e+09	97.3721	3655896542	93.0185
L30FR-2	51333432	3850007400	3.73129e+09	96.9163	3.54399e+09	92.0515
L30FR-3	52005500	3900412500	3776997588	96.8358	3.58353e+09	91.8757
SCK-1	50356574	3776743050	3.67341e+09	97.2641	3502290391	92.7331
SCK-2	41066168	3079962600	2986941800	96.9798	2839244175	92.1844
SCK-3	44241088	3318081600	3.226e+09	97.2247	3080952754	92.8534
S6FR-1	46031240	3452343000	3.36335e+09	97.4221	3221391923	93.3103
S6FR-2	54284038	4071302850	3958850672	97.2379	3.77838e+09	92.8051
S6FR-3	57029382	4277203650	4.15446e+09	97.1303	3.96159e+09	92.6211
S30FR-1	50554758	3791606850	3698348524	97.5404	3.54676e+09	93.5425
S30FR-2	48852890	3663966750	3553789119	96.9929	3.38375e+09	92.352
S30FR-3	61135738	4585180350	4.46152e+09	97.3031	4.26664e+09	93.0527
