# Supplementary material for: Supplementary Low Far-Red Light Promotes Proliferation and Photosynthetic Capacity of Blueberry In Vitro Plantlets
Source: Int J Mol Sci. 2024 Jan 5;25(2):688. doi: 10.3390/ijms25020688 (PMC10815622; doi:10.3390/ijms25020688)
Supplement: Supplementary file 1 [file ijms-25-00688-s001.zip › Supplementary Materials/Table S2 stem_blue_GO.xls]

Class	GO_Name	GO_ID	GO_Level	P_value	EnrichmentScore	HitsGenesCountsInSelectedSet	HitsGenesCountsInBackground	AllGenesCountsInSelectedSet	AllGenesCountsInBackground	GenesOfSelectedSetInGOterm	corrected p-value(BH method)
Molecular function	iron ion binding	GO:0005506	7	1.5367152872425294E-7	17.70487085906794	7	137	104	36037	VaccDscaff26-processed-gene-123.26,VaccDscaff26-snap-gene-123.44,VaccDscaff29-augustus-gene-121.23,VaccDscaff21-snap-gene-120.36,VaccDscaff165-augustus-gene-2.35,VaccDscaff33-augustus-gene-216.27,VaccDscaff5-augustus-gene-192.33,	4.856020307686393E-5
Molecular function	cation binding	GO:0043169	4	7.308687595908303E-5	2.8889963028633945	17	2039	104	36037	VaccDscaff44-augustus-gene-94.24,VaccDscaff20-augustus-gene-262.18,VaccDscaff44-augustus-gene-118.31,VaccDscaff26-processed-gene-123.26,VaccDscaff46-augustus-gene-204.29,VaccDscaff118-snap-gene-3.94,VaccDscaff26-snap-gene-123.44,VaccDscaff29-augustus-gene-121.23,VaccDscaff21-snap-gene-120.36,VaccDscaff14-augustus-gene-22.26,VaccDscaff15-augustus-gene-216.27,VaccDscaff21-augustus-gene-28.21,VaccDs…	0.0076984842676900795
Molecular function	transition metal ion binding	GO:0046914	6	8.239691166989083E-5	3.5192382812500003	13	1280	104	36037	VaccDscaff44-augustus-gene-94.24,VaccDscaff20-augustus-gene-262.18,VaccDscaff26-processed-gene-123.26,VaccDscaff118-snap-gene-3.94,VaccDscaff26-snap-gene-123.44,VaccDscaff29-augustus-gene-121.23,VaccDscaff21-snap-gene-120.36,VaccDscaff15-augustus-gene-216.27,VaccDscaff21-augustus-gene-28.21,VaccDscaff165-augustus-gene-2.35,VaccDscaff33-augustus-gene-216.27,VaccDscaff5-augustus-gene-192.33,VaccDsc…	0.006509356021921375
Molecular function	metal ion binding	GO:0046872	5	0.001253448445897476	2.5253173427301485	14	1921	104	36037	VaccDscaff44-augustus-gene-94.24,VaccDscaff20-augustus-gene-262.18,VaccDscaff44-augustus-gene-118.31,VaccDscaff26-processed-gene-123.26,VaccDscaff118-snap-gene-3.94,VaccDscaff26-snap-gene-123.44,VaccDscaff29-augustus-gene-121.23,VaccDscaff21-snap-gene-120.36,VaccDscaff15-augustus-gene-216.27,VaccDscaff21-augustus-gene-28.21,VaccDscaff165-augustus-gene-2.35,VaccDscaff33-augustus-gene-216.27,VaccDs…	0.05658424412908606
Molecular function	ion binding	GO:0043167	3	0.005924164876093041	1.8981050142796947	18	3286	104	36037	VaccDscaff44-augustus-gene-94.24,VaccDscaff20-augustus-gene-262.18,VaccDscaff44-augustus-gene-118.31,VaccDscaff26-processed-gene-123.26,VaccDscaff46-augustus-gene-204.29,VaccDscaff118-snap-gene-3.94,VaccDscaff26-snap-gene-123.44,VaccDscaff29-augustus-gene-121.23,VaccDscaff21-snap-gene-120.36,VaccDscaff14-augustus-gene-22.26,VaccDscaff15-augustus-gene-216.27,VaccDscaff21-augustus-gene-28.21,VaccDs…	0.10400200560252228
Molecular function	monooxygenase activity	GO:0004497	4	0.0105743448001977	2.9118455074337426	7	833	104	36037	VaccDscaff43-augustus-gene-61.62,VaccDscaff6-snap-gene-255.21,VaccDscaff13-augustus-gene-316.17,VaccDscaff47-snap-gene-141.41,VaccDscaff21-augustus-gene-18.55,VaccDscaff7-augustus-gene-400.36,VaccDscaff3-processed-gene-125.13,	0.15188604349374876
Molecular function	enzyme regulator activity	GO:0030234	3	0.012269991712739126	2.5955776433304525	8	1068	104	36037	VaccDscaff2-processed-gene-364.26,VaccDscaff47-augustus-gene-134.35,VaccDscaff21-snap-gene-83.43,VaccDscaff33-processed-gene-17.23,VaccDscaff914-snap-gene-0.19,VaccDscaff6-augustus-gene-154.23,VaccDscaff40-snap-gene-16.49,VaccDscaff14-processed-gene-313.4,	0.12116616816329887
Molecular function	molecular function regulator activity	GO:0098772	2	0.013658832838759793	2.5455251818888183	8	1089	104	36037	VaccDscaff2-processed-gene-364.26,VaccDscaff47-augustus-gene-134.35,VaccDscaff21-snap-gene-83.43,VaccDscaff33-processed-gene-17.23,VaccDscaff914-snap-gene-0.19,VaccDscaff6-augustus-gene-154.23,VaccDscaff40-snap-gene-16.49,VaccDscaff14-processed-gene-313.4,	0.13079367203176046
Molecular function	ATPase-coupled transmembrane transporter activity	GO:0042626	6	0.014694477539928363	3.030696344471855	6	686	104	36037	VaccDscaff35-augustus-gene-320.55,VaccDscaff48-processed-gene-43.26,VaccDscaff38-augustus-gene-76.18,VaccDscaff34-processed-gene-20.14,VaccDscaff8-augustus-gene-159.32,VaccDscaff48-augustus-gene-43.43,	0.13657220301815773
Molecular function	primary active transmembrane transporter activity	GO:0015399	5	0.01754179095050923	2.911845507433743	6	714	104	36037	VaccDscaff35-augustus-gene-320.55,VaccDscaff48-processed-gene-43.26,VaccDscaff38-augustus-gene-76.18,VaccDscaff34-processed-gene-20.14,VaccDscaff8-augustus-gene-159.32,VaccDscaff48-augustus-gene-43.43,	0.14213348565027992
Molecular function	oxidoreductase activity	GO:0016491	3	0.018999896167070984	1.753924025989828	16	3161	104	36037	VaccDscaff43-augustus-gene-61.62,VaccDscaff6-snap-gene-255.21,VaccDscaff12-augustus-gene-293.23,VaccDscaff23-augustus-gene-100.23,VaccDscaff13-augustus-gene-316.17,VaccDscaff29-augustus-gene-100.28,VaccDscaff11-augustus-gene-205.21,VaccDscaff8-snap-gene-296.44,VaccDscaff47-snap-gene-141.41,VaccDscaff21-augustus-gene-18.55,VaccDscaff7-augustus-gene-400.36,VaccDscaff12-snap-gene-335.42,VaccDscaff22…	0.15009917971986078
Molecular function	active transmembrane transporter activity	GO:0022804	4	0.028845299827164217	2.2105876579560793	8	1254	104	36037	VaccDscaff176-snap-gene-1.71,VaccDscaff35-augustus-gene-320.55,VaccDscaff48-processed-gene-43.26,VaccDscaff3-augustus-gene-417.23,VaccDscaff38-augustus-gene-76.18,VaccDscaff34-processed-gene-20.14,VaccDscaff8-augustus-gene-159.32,VaccDscaff48-augustus-gene-43.43,	0.20255810545297537
Molecular function	DNA-binding transcription factor activity	GO:0003700	3	0.0469291391936848	1.516453459013634	18	4113	104	36037	VaccDscaff28-snap-gene-344.49,VaccDscaff14-augustus-gene-155.31,VaccDscaff30-snap-gene-127.34,VaccDscaff17-snap-gene-166.24,VaccDscaff17-augustus-gene-368.23,VaccDscaff32-processed-gene-84.20,VaccDscaff47-augustus-gene-158.17,VaccDscaff24-augustus-gene-120.21,VaccDscaff7-processed-gene-67.5,VaccDscaff22-augustus-gene-298.44,VaccDscaff42-augustus-gene-124.16,VaccDscaff40-processed-gene-60.5,VaccDs…	0.2088677181014704
Cellular component	membrane	GO:0016020	3	1.3542475420746936E-4	1.4404777066683645	65	16245	116	41761	VaccDscaff1277-augustus-gene-0.5,VaccDscaff27-augustus-gene-1.22,VaccDscaff43-augustus-gene-61.62,VaccDscaff3-processed-gene-159.7,VaccDscaff5-augustus-gene-43.29,VaccDscaff6-snap-gene-255.21,VaccDscaff12-augustus-gene-293.23,VaccDscaff176-snap-gene-1.71,VaccDscaff23-augustus-gene-100.23,VaccDscaff5-augustus-gene-295.34,VaccDscaff31-processed-gene-29.14,VaccDscaff35-augustus-gene-320.55,VaccDscaf…	0.02532442903679677
Cellular component	cell periphery	GO:0071944	3	7.502796969258707E-4	1.524635535449071	47	11098	116	41761	VaccDscaff1277-augustus-gene-0.5,VaccDscaff3-processed-gene-159.7,VaccDscaff5-augustus-gene-43.29,VaccDscaff303-augustus-gene-0.44,VaccDscaff12-augustus-gene-293.23,VaccDscaff176-snap-gene-1.71,VaccDscaff23-augustus-gene-100.23,VaccDscaff31-processed-gene-29.14,VaccDscaff21-snap-gene-83.43,VaccDscaff34-processed-gene-95.3,VaccDscaff33-processed-gene-17.23,VaccDscaff20-augustus-gene-155.11,VaccDsc…	0.07015115166256891
Cellular component	plasma membrane	GO:0005886	4	0.0018071531856636014	1.5332246232757725	41	9627	116	41761	VaccDscaff1277-augustus-gene-0.5,VaccDscaff5-augustus-gene-43.29,VaccDscaff12-augustus-gene-293.23,VaccDscaff176-snap-gene-1.71,VaccDscaff23-augustus-gene-100.23,VaccDscaff31-processed-gene-29.14,VaccDscaff34-processed-gene-95.3,VaccDscaff20-augustus-gene-155.11,VaccDscaff1-augustus-gene-18.52,VaccDscaff17-augustus-gene-368.23,VaccDscaff46-augustus-gene-204.29,VaccDscaff86-augustus-gene-5.56,Vacc…	0.11264588190636449
Cellular component	chloroplast stroma	GO:0009570	4	0.013203105166819773	2.0000478927203065	13	2340	116	41761	VaccDscaff2-processed-gene-364.26,VaccDscaff29-augustus-gene-100.28,VaccDscaff26-processed-gene-123.26,VaccDscaff11-augustus-gene-205.21,VaccDscaff29-augustus-gene-121.23,VaccDscaff21-snap-gene-120.36,VaccDscaff964-augustus-gene-0.8,VaccDscaff165-augustus-gene-2.35,VaccDscaff29-augustus-gene-27.40,VaccDscaff33-augustus-gene-216.27,VaccDscaff33-augustus-gene-260.30,VaccDscaff5-augustus-gene-192.33…	0.49379613323905946
Cellular component	plastid stroma	GO:0009532	3	0.014403425266448666	1.9772336582025845	13	2367	116	41761	VaccDscaff2-processed-gene-364.26,VaccDscaff29-augustus-gene-100.28,VaccDscaff26-processed-gene-123.26,VaccDscaff11-augustus-gene-205.21,VaccDscaff29-augustus-gene-121.23,VaccDscaff21-snap-gene-120.36,VaccDscaff964-augustus-gene-0.8,VaccDscaff165-augustus-gene-2.35,VaccDscaff29-augustus-gene-27.40,VaccDscaff33-augustus-gene-216.27,VaccDscaff33-augustus-gene-260.30,VaccDscaff5-augustus-gene-192.33…	0.44890675413765013
Cellular component	cell wall	GO:0005618	4	0.017901298025295054	2.064700118658085	11	1918	116	41761	VaccDscaff3-processed-gene-159.7,VaccDscaff303-augustus-gene-0.44,VaccDscaff34-processed-gene-95.3,VaccDscaff33-processed-gene-17.23,VaccDscaff1-augustus-gene-18.52,VaccDscaff9-augustus-gene-0.35,VaccDscaff10-augustus-gene-385.37,VaccDscaff21-augustus-gene-152.24,VaccDscaff8-augustus-gene-20.31,VaccDscaff5-augustus-gene-16.30,VaccDscaff17-processed-gene-284.6,	0.47822039010431067
Cellular component	external encapsulating structure	GO:0030312	3	0.019694606090136513	2.034992203281709	11	1946	116	41761	VaccDscaff3-processed-gene-159.7,VaccDscaff303-augustus-gene-0.44,VaccDscaff34-processed-gene-95.3,VaccDscaff33-processed-gene-17.23,VaccDscaff1-augustus-gene-18.52,VaccDscaff9-augustus-gene-0.35,VaccDscaff10-augustus-gene-385.37,VaccDscaff21-augustus-gene-152.24,VaccDscaff8-augustus-gene-20.31,VaccDscaff5-augustus-gene-16.30,VaccDscaff17-processed-gene-284.6,	0.4092101487617253
Cellular component	obsolete chloroplast part	GO:0044434	0	0.03988006209064243	1.5769509280402314	17	3881	116	41761	VaccDscaff2-processed-gene-364.26,VaccDscaff29-augustus-gene-100.28,VaccDscaff26-processed-gene-123.26,VaccDscaff11-augustus-gene-205.21,VaccDscaff21-augustus-gene-152.24,VaccDscaff50-augustus-gene-17.30,VaccDscaff29-augustus-gene-121.23,VaccDscaff39-augustus-gene-89.22,VaccDscaff19-augustus-gene-322.30,VaccDscaff21-snap-gene-120.36,VaccDscaff964-augustus-gene-0.8,VaccDscaff165-augustus-gene-2.35…	0.5736593546884718
Cellular component	obsolete plastid part	GO:0044435	0	0.04567441702122943	1.5501890961813924	17	3948	116	41761	VaccDscaff2-processed-gene-364.26,VaccDscaff29-augustus-gene-100.28,VaccDscaff26-processed-gene-123.26,VaccDscaff11-augustus-gene-205.21,VaccDscaff21-augustus-gene-152.24,VaccDscaff50-augustus-gene-17.30,VaccDscaff29-augustus-gene-121.23,VaccDscaff39-augustus-gene-89.22,VaccDscaff19-augustus-gene-322.30,VaccDscaff21-snap-gene-120.36,VaccDscaff964-augustus-gene-0.8,VaccDscaff165-augustus-gene-2.35…	0.533819748935619
Biological process	obsolete iron ion homeostasis	GO:0055072	0	7.993605777301127E-15	30.37536231884058	12	144	115	41918	VaccDscaff12-augustus-gene-293.23,VaccDscaff23-augustus-gene-100.23,VaccDscaff26-processed-gene-123.26,VaccDscaff86-augustus-gene-5.56,VaccDscaff26-snap-gene-123.44,VaccDscaff29-augustus-gene-121.23,VaccDscaff34-processed-gene-228.1,VaccDscaff21-snap-gene-120.36,VaccDscaff165-augustus-gene-2.35,VaccDscaff33-augustus-gene-216.27,VaccDscaff33-augustus-gene-260.30,VaccDscaff5-augustus-gene-192.33,	1.1878498185069475E-11
Biological process	intracellular sequestering of iron ion	GO:0006880	6	3.355093980417223E-13	67.81476238624873	8	43	115	41918	VaccDscaff26-processed-gene-123.26,VaccDscaff26-snap-gene-123.44,VaccDscaff29-augustus-gene-121.23,VaccDscaff34-processed-gene-228.1,VaccDscaff21-snap-gene-120.36,VaccDscaff165-augustus-gene-2.35,VaccDscaff33-augustus-gene-216.27,VaccDscaff5-augustus-gene-192.33,	2.4928348274499967E-10
Biological process	sequestering of iron ion	GO:0097577	5	3.355093980417223E-13	67.81476238624873	8	43	115	41918	VaccDscaff26-processed-gene-123.26,VaccDscaff26-snap-gene-123.44,VaccDscaff29-augustus-gene-121.23,VaccDscaff34-processed-gene-228.1,VaccDscaff21-snap-gene-120.36,VaccDscaff165-augustus-gene-2.35,VaccDscaff33-augustus-gene-216.27,VaccDscaff5-augustus-gene-192.33,	2.4928348274499967E-10
Biological process	iron ion transport	GO:0006826	9	6.620259895839808E-13	32.83822953388171	10	111	115	41918	VaccDscaff12-augustus-gene-293.23,VaccDscaff23-augustus-gene-100.23,VaccDscaff26-processed-gene-123.26,VaccDscaff86-augustus-gene-5.56,VaccDscaff29-augustus-gene-121.23,VaccDscaff34-processed-gene-228.1,VaccDscaff21-snap-gene-120.36,VaccDscaff165-augustus-gene-2.35,VaccDscaff33-augustus-gene-216.27,VaccDscaff5-augustus-gene-192.33,	2.459426551304489E-10
Biological process	intracellular iron ion homeostasis	GO:0006879	7	6.620259895839808E-13	32.83822953388171	10	111	115	41918	VaccDscaff12-augustus-gene-293.23,VaccDscaff23-augustus-gene-100.23,VaccDscaff26-processed-gene-123.26,VaccDscaff26-snap-gene-123.44,VaccDscaff29-augustus-gene-121.23,VaccDscaff34-processed-gene-228.1,VaccDscaff21-snap-gene-120.36,VaccDscaff165-augustus-gene-2.35,VaccDscaff33-augustus-gene-216.27,VaccDscaff5-augustus-gene-192.33,	2.459426551304489E-10
Biological process	obsolete transition metal ion homeostasis	GO:0055076	0	7.766787213370208E-12	14.446818663838812	13	328	115	41918	VaccDscaff12-augustus-gene-293.23,VaccDscaff23-augustus-gene-100.23,VaccDscaff26-processed-gene-123.26,VaccDscaff86-augustus-gene-5.56,VaccDscaff26-snap-gene-123.44,VaccDscaff29-augustus-gene-121.23,VaccDscaff34-processed-gene-228.1,VaccDscaff21-snap-gene-120.36,VaccDscaff21-augustus-gene-28.21,VaccDscaff165-augustus-gene-2.35,VaccDscaff33-augustus-gene-216.27,VaccDscaff33-augustus-gene-260.30,Va…	1.923574299844688E-9
Biological process	sequestering of metal ion	GO:0051238	4	2.9033775383879856E-11	39.945681953543776	8	73	115	41918	VaccDscaff26-processed-gene-123.26,VaccDscaff26-snap-gene-123.44,VaccDscaff29-augustus-gene-121.23,VaccDscaff34-processed-gene-228.1,VaccDscaff21-snap-gene-120.36,VaccDscaff165-augustus-gene-2.35,VaccDscaff33-augustus-gene-216.27,VaccDscaff5-augustus-gene-192.33,	6.163455745777924E-9
Biological process	obsolete metal ion homeostasis	GO:0055065	0	4.1524561567030105E-11	8.057963475999323	17	769	115	41918	VaccDscaff12-augustus-gene-293.23,VaccDscaff23-augustus-gene-100.23,VaccDscaff34-processed-gene-95.3,VaccDscaff44-augustus-gene-118.31,VaccDscaff26-processed-gene-123.26,VaccDscaff86-augustus-gene-5.56,VaccDscaff26-snap-gene-123.44,VaccDscaff29-augustus-gene-121.23,VaccDscaff19-augustus-gene-322.30,VaccDscaff34-processed-gene-228.1,VaccDscaff21-snap-gene-120.36,VaccDscaff21-augustus-gene-28.21,Va…	7.713187311075842E-9
Biological process	monoatomic cation homeostasis	GO:0055080	5	4.908018436111661E-11	7.330813699295604	18	895	115	41918	VaccDscaff12-augustus-gene-293.23,VaccDscaff23-augustus-gene-100.23,VaccDscaff35-augustus-gene-320.55,VaccDscaff34-processed-gene-95.3,VaccDscaff44-augustus-gene-118.31,VaccDscaff26-processed-gene-123.26,VaccDscaff86-augustus-gene-5.56,VaccDscaff26-snap-gene-123.44,VaccDscaff29-augustus-gene-121.23,VaccDscaff19-augustus-gene-322.30,VaccDscaff34-processed-gene-228.1,VaccDscaff21-snap-gene-120.36,V…	8.103683773402142E-9
Biological process	monoatomic ion homeostasis	GO:0050801	4	9.194744965412838E-11	6.545919289882468	19	1058	115	41918	VaccDscaff12-augustus-gene-293.23,VaccDscaff23-augustus-gene-100.23,VaccDscaff35-augustus-gene-320.55,VaccDscaff34-processed-gene-95.3,VaccDscaff44-augustus-gene-118.31,VaccDscaff26-processed-gene-123.26,VaccDscaff86-augustus-gene-5.56,VaccDscaff26-snap-gene-123.44,VaccDscaff29-augustus-gene-121.23,VaccDscaff10-augustus-gene-165.15,VaccDscaff19-augustus-gene-322.30,VaccDscaff34-processed-gene-228…	1.3663391018603477E-8
Biological process	inorganic ion homeostasis	GO:0098771	4	1.0826040064415565E-10	6.979870490286772	18	940	115	41918	VaccDscaff12-augustus-gene-293.23,VaccDscaff23-augustus-gene-100.23,VaccDscaff35-augustus-gene-320.55,VaccDscaff34-processed-gene-95.3,VaccDscaff44-augustus-gene-118.31,VaccDscaff26-processed-gene-123.26,VaccDscaff86-augustus-gene-5.56,VaccDscaff26-snap-gene-123.44,VaccDscaff29-augustus-gene-121.23,VaccDscaff19-augustus-gene-322.30,VaccDscaff34-processed-gene-228.1,VaccDscaff21-snap-gene-120.36,V…	1.4624995941565027E-8
Biological process	chemical homeostasis	GO:0048878	3	1.9178680865650222E-10	4.9548463356973995	23	1692	115	41918	VaccDscaff12-augustus-gene-293.23,VaccDscaff23-augustus-gene-100.23,VaccDscaff35-augustus-gene-320.55,VaccDscaff34-processed-gene-95.3,VaccDscaff20-augustus-gene-155.11,VaccDscaff44-augustus-gene-118.31,VaccDscaff26-processed-gene-123.26,VaccDscaff86-augustus-gene-5.56,VaccDscaff26-snap-gene-123.44,VaccDscaff29-augustus-gene-121.23,VaccDscaff10-augustus-gene-165.15,VaccDscaff19-augustus-gene-322.…	2.3749599805296857E-8
Biological process	homeostatic process	GO:0042592	2	7.686461467315553E-10	4.404886378562984	24	1986	115	41918	VaccDscaff12-augustus-gene-293.23,VaccDscaff23-augustus-gene-100.23,VaccDscaff35-augustus-gene-320.55,VaccDscaff34-processed-gene-95.3,VaccDscaff20-augustus-gene-155.11,VaccDscaff44-augustus-gene-118.31,VaccDscaff26-processed-gene-123.26,VaccDscaff86-augustus-gene-5.56,VaccDscaff26-snap-gene-123.44,VaccDscaff29-augustus-gene-121.23,VaccDscaff10-augustus-gene-165.15,VaccDscaff19-augustus-gene-322.…	8.786216723408394E-8
Biological process	intracellular monoatomic cation homeostasis	GO:0030003	6	1.4618463106685908E-9	8.393192219679635	14	608	115	41918	VaccDscaff12-augustus-gene-293.23,VaccDscaff23-augustus-gene-100.23,VaccDscaff35-augustus-gene-320.55,VaccDscaff44-augustus-gene-118.31,VaccDscaff26-processed-gene-123.26,VaccDscaff86-augustus-gene-5.56,VaccDscaff26-snap-gene-123.44,VaccDscaff29-augustus-gene-121.23,VaccDscaff34-processed-gene-228.1,VaccDscaff21-snap-gene-120.36,VaccDscaff21-augustus-gene-28.21,VaccDscaff165-augustus-gene-2.35,Va…	1.55164544118109E-7
Biological process	intracellular monoatomic ion homeostasis	GO:0006873	5	2.542714039321936E-9	8.036316330023965	14	635	115	41918	VaccDscaff12-augustus-gene-293.23,VaccDscaff23-augustus-gene-100.23,VaccDscaff35-augustus-gene-320.55,VaccDscaff44-augustus-gene-118.31,VaccDscaff26-processed-gene-123.26,VaccDscaff86-augustus-gene-5.56,VaccDscaff26-snap-gene-123.44,VaccDscaff29-augustus-gene-121.23,VaccDscaff34-processed-gene-228.1,VaccDscaff21-snap-gene-120.36,VaccDscaff21-augustus-gene-28.21,VaccDscaff165-augustus-gene-2.35,Va…	2.518982041621598E-7
Biological process	intracellular chemical homeostasis	GO:0055082	4	3.3244611508109756E-9	7.12850745422595	15	767	115	41918	VaccDscaff12-augustus-gene-293.23,VaccDscaff23-augustus-gene-100.23,VaccDscaff35-augustus-gene-320.55,VaccDscaff44-augustus-gene-118.31,VaccDscaff26-processed-gene-123.26,VaccDscaff86-augustus-gene-5.56,VaccDscaff26-snap-gene-123.44,VaccDscaff29-augustus-gene-121.23,VaccDscaff34-processed-gene-228.1,VaccDscaff21-snap-gene-120.36,VaccDscaff21-augustus-gene-28.21,VaccDscaff165-augustus-gene-2.35,Va…	3.0875932938156936E-7
Biological process	response to iron ion	GO:0010039	6	3.3309411895388052E-9	13.859480905934864	10	263	115	41918	VaccDscaff43-augustus-gene-61.62,VaccDscaff26-processed-gene-123.26,VaccDscaff29-augustus-gene-121.23,VaccDscaff47-snap-gene-141.41,VaccDscaff34-processed-gene-228.1,VaccDscaff21-snap-gene-120.36,VaccDscaff15-augustus-gene-216.27,VaccDscaff165-augustus-gene-2.35,VaccDscaff33-augustus-gene-216.27,VaccDscaff5-augustus-gene-192.33,	2.911634475090979E-7
Biological process	transition metal ion transport	GO:0000041	8	5.467416852589224E-9	13.159001726573536	10	277	115	41918	VaccDscaff12-augustus-gene-293.23,VaccDscaff23-augustus-gene-100.23,VaccDscaff26-processed-gene-123.26,VaccDscaff86-augustus-gene-5.56,VaccDscaff29-augustus-gene-121.23,VaccDscaff34-processed-gene-228.1,VaccDscaff21-snap-gene-120.36,VaccDscaff165-augustus-gene-2.35,VaccDscaff33-augustus-gene-216.27,VaccDscaff5-augustus-gene-192.33,	4.513656357193104E-7
Biological process	obsolete intracellular transition metal ion homeostasis	GO:0046916	0	1.3020931888263476E-8	14.64526397515528	9	224	115	41918	VaccDscaff26-processed-gene-123.26,VaccDscaff26-snap-gene-123.44,VaccDscaff29-augustus-gene-121.23,VaccDscaff34-processed-gene-228.1,VaccDscaff21-snap-gene-120.36,VaccDscaff21-augustus-gene-28.21,VaccDscaff165-augustus-gene-2.35,VaccDscaff33-augustus-gene-216.27,VaccDscaff5-augustus-gene-192.33,	1.018373936103133E-6
Biological process	cellular homeostasis	GO:0019725	3	4.065325664992514E-8	5.898128605600112	15	927	115	41918	VaccDscaff12-augustus-gene-293.23,VaccDscaff23-augustus-gene-100.23,VaccDscaff35-augustus-gene-320.55,VaccDscaff44-augustus-gene-118.31,VaccDscaff26-processed-gene-123.26,VaccDscaff86-augustus-gene-5.56,VaccDscaff26-snap-gene-123.44,VaccDscaff29-augustus-gene-121.23,VaccDscaff34-processed-gene-228.1,VaccDscaff21-snap-gene-120.36,VaccDscaff21-augustus-gene-28.21,VaccDscaff165-augustus-gene-2.35,Va…	3.020536969089438E-6
Biological process	obsolete intracellular metal ion homeostasis	GO:0006875	0	1.5744511150384E-7	7.955452035886818	11	504	115	41918	VaccDscaff44-augustus-gene-118.31,VaccDscaff26-processed-gene-123.26,VaccDscaff86-augustus-gene-5.56,VaccDscaff26-snap-gene-123.44,VaccDscaff29-augustus-gene-121.23,VaccDscaff34-processed-gene-228.1,VaccDscaff21-snap-gene-120.36,VaccDscaff21-augustus-gene-28.21,VaccDscaff165-augustus-gene-2.35,VaccDscaff33-augustus-gene-216.27,VaccDscaff5-augustus-gene-192.33,	1.1141115985462202E-5
Biological process	regulation of biological quality	GO:0065008	3	3.96505565491978E-7	2.5596092013242884	32	4557	115	41918	VaccDscaff2-processed-gene-364.26,VaccDscaff12-augustus-gene-293.23,VaccDscaff47-augustus-gene-134.35,VaccDscaff23-augustus-gene-100.23,VaccDscaff35-augustus-gene-320.55,VaccDscaff34-processed-gene-95.3,VaccDscaff20-augustus-gene-155.11,VaccDscaff44-augustus-gene-118.31,VaccDscaff26-processed-gene-123.26,VaccDscaff86-augustus-gene-5.56,VaccDscaff26-snap-gene-123.44,VaccDscaff42-augustus-gene-124.…	2.6782148650958153E-5
Biological process	response to reactive oxygen species	GO:0000302	5	5.354483216812866E-7	5.674917990106743	13	835	115	41918	VaccDscaff29-augustus-gene-100.28,VaccDscaff26-processed-gene-123.26,VaccDscaff22-processed-gene-12.3,VaccDscaff50-augustus-gene-17.30,VaccDscaff29-augustus-gene-121.23,VaccDscaff46-snap-gene-201.32,VaccDscaff34-processed-gene-228.1,VaccDscaff21-snap-gene-120.36,VaccDscaff1437-augustus-gene-0.6,VaccDscaff165-augustus-gene-2.35,VaccDscaff29-augustus-gene-27.40,VaccDscaff33-augustus-gene-216.27,Vac…	3.459461765297356E-5
Biological process	maintenance of location in cell	GO:0051651	4	1.4858791895777657E-6	10.055292353823088	8	290	115	41918	VaccDscaff26-processed-gene-123.26,VaccDscaff26-snap-gene-123.44,VaccDscaff29-augustus-gene-121.23,VaccDscaff34-processed-gene-228.1,VaccDscaff21-snap-gene-120.36,VaccDscaff165-augustus-gene-2.35,VaccDscaff33-augustus-gene-216.27,VaccDscaff5-augustus-gene-192.33,	9.200068648802333E-5
Biological process	response to abiotic stimulus	GO:0009628	3	2.5376657891706955E-6	2.0341198122865882	41	7347	115	41918	VaccDscaff2-processed-gene-364.26,VaccDscaff28-snap-gene-344.49,VaccDscaff14-augustus-gene-155.31,VaccDscaff30-snap-gene-127.34,VaccDscaff5-augustus-gene-295.34,VaccDscaff31-processed-gene-29.14,VaccDscaff13-augustus-gene-316.17,VaccDscaff29-augustus-gene-100.28,VaccDscaff20-augustus-gene-155.11,VaccDscaff1-augustus-gene-18.52,VaccDscaff17-augustus-gene-368.23,VaccDscaff32-processed-gene-84.20,Va…	1.5083885450830614E-4
Biological process	positive regulation of protein ubiquitination	GO:0031398	10	8.290244880693187E-6	18.409310496267018	5	99	115	41918	VaccDscaff44-augustus-gene-94.24,VaccDscaff20-augustus-gene-262.18,VaccDscaff118-snap-gene-3.94,VaccDscaff914-snap-gene-0.19,VaccDscaff6-augustus-gene-154.23,	4.5627051454481766E-4
Biological process	maintenance of location	GO:0051235	3	1.0986209184715712E-5	7.653634600022823	8	381	115	41918	VaccDscaff26-processed-gene-123.26,VaccDscaff26-snap-gene-123.44,VaccDscaff29-augustus-gene-121.23,VaccDscaff34-processed-gene-228.1,VaccDscaff21-snap-gene-120.36,VaccDscaff165-augustus-gene-2.35,VaccDscaff33-augustus-gene-216.27,VaccDscaff5-augustus-gene-192.33,	5.830538160174124E-4
Biological process	leaf development	GO:0048366	6	1.1129358368888731E-5	3.7551958910654566	15	1456	115	41918	VaccDscaff2-processed-gene-364.26,VaccDscaff1277-augustus-gene-0.5,VaccDscaff14-augustus-gene-155.31,VaccDscaff26-processed-gene-123.26,VaccDscaff29-augustus-gene-121.23,VaccDscaff46-snap-gene-201.32,VaccDscaff38-augustus-gene-76.18,VaccDscaff21-snap-gene-120.36,VaccDscaff20-augustus-gene-121.18,VaccDscaff165-augustus-gene-2.35,VaccDscaff33-augustus-gene-216.27,VaccDscaff33-augustus-gene-260.30,V…	5.702836736609881E-4
Biological process	positive regulation of protein modification by small protein conjugation or removal	GO:1903322	9	1.3249548669103106E-5	16.720382927802156	5	109	115	41918	VaccDscaff44-augustus-gene-94.24,VaccDscaff20-augustus-gene-262.18,VaccDscaff118-snap-gene-3.94,VaccDscaff914-snap-gene-0.19,VaccDscaff6-augustus-gene-154.23,	6.562943107429072E-4
Biological process	response to other organism	GO:0051707	5	1.766510407807953E-5	2.3137886509023886	28	4411	115	41918	VaccDscaff2-processed-gene-364.26,VaccDscaff28-snap-gene-344.49,VaccDscaff14-augustus-gene-155.31,VaccDscaff12-augustus-gene-293.23,VaccDscaff23-augustus-gene-100.23,VaccDscaff13-augustus-gene-316.17,VaccDscaff21-snap-gene-83.43,VaccDscaff20-augustus-gene-155.11,VaccDscaff1-augustus-gene-18.52,VaccDscaff44-augustus-gene-151.19,VaccDscaff22-processed-gene-12.3,VaccDscaff10-augustus-gene-385.37,Vac…	8.467853116137478E-4
Biological process	response to external biotic stimulus	GO:0043207	4	1.872550451831323E-5	2.3064681896339967	28	4425	115	41918	VaccDscaff2-processed-gene-364.26,VaccDscaff28-snap-gene-344.49,VaccDscaff14-augustus-gene-155.31,VaccDscaff12-augustus-gene-293.23,VaccDscaff23-augustus-gene-100.23,VaccDscaff13-augustus-gene-316.17,VaccDscaff21-snap-gene-83.43,VaccDscaff20-augustus-gene-155.11,VaccDscaff1-augustus-gene-18.52,VaccDscaff44-augustus-gene-151.19,VaccDscaff22-processed-gene-12.3,VaccDscaff10-augustus-gene-385.37,Vac…	8.695656160691706E-4
Biological process	response to inorganic substance	GO:0010035	4	2.019475347159183E-5	2.4595435075984273	25	3705	115	41918	VaccDscaff28-snap-gene-344.49,VaccDscaff14-augustus-gene-155.31,VaccDscaff43-augustus-gene-61.62,VaccDscaff47-augustus-gene-134.35,VaccDscaff29-augustus-gene-100.28,VaccDscaff20-augustus-gene-155.11,VaccDscaff26-processed-gene-123.26,VaccDscaff13-augustus-gene-69.34,VaccDscaff22-processed-gene-12.3,VaccDscaff22-augustus-gene-298.44,VaccDscaff21-augustus-gene-152.24,VaccDscaff29-augustus-gene-121.…	9.093758684480443E-4
Biological process	response to biotic stimulus	GO:0009607	3	2.1459175150728704E-5	2.2893947373554138	28	4458	115	41918	VaccDscaff2-processed-gene-364.26,VaccDscaff28-snap-gene-344.49,VaccDscaff14-augustus-gene-155.31,VaccDscaff12-augustus-gene-293.23,VaccDscaff23-augustus-gene-100.23,VaccDscaff13-augustus-gene-316.17,VaccDscaff21-snap-gene-83.43,VaccDscaff20-augustus-gene-155.11,VaccDscaff1-augustus-gene-18.52,VaccDscaff44-augustus-gene-151.19,VaccDscaff22-processed-gene-12.3,VaccDscaff10-augustus-gene-385.37,Vac…	9.378921845289075E-4
Biological process	response to oxidative stress	GO:0006979	4	2.3235858152670374E-5	3.5251871163064505	15	1551	115	41918	VaccDscaff29-augustus-gene-100.28,VaccDscaff4-augustus-gene-300.26,VaccDscaff26-processed-gene-123.26,VaccDscaff22-processed-gene-12.3,VaccDscaff50-augustus-gene-17.30,VaccDscaff29-augustus-gene-121.23,VaccDscaff46-snap-gene-201.32,VaccDscaff34-processed-gene-228.1,VaccDscaff21-snap-gene-120.36,VaccDscaff1437-augustus-gene-0.6,VaccDscaff964-augustus-gene-0.8,VaccDscaff165-augustus-gene-2.35,VaccD…	9.865281489962335E-4
Biological process	regulation of protein ubiquitination	GO:0031396	9	2.568708122030472E-5	14.580173913043478	5	125	115	41918	VaccDscaff44-augustus-gene-94.24,VaccDscaff20-augustus-gene-262.18,VaccDscaff118-snap-gene-3.94,VaccDscaff914-snap-gene-0.19,VaccDscaff6-augustus-gene-154.23,	0.001060305630371467
Biological process	biological process involved in interspecies interaction between organisms	GO:0044419	2	3.586898481366951E-5	2.2254953639621533	28	4586	115	41918	VaccDscaff2-processed-gene-364.26,VaccDscaff28-snap-gene-344.49,VaccDscaff14-augustus-gene-155.31,VaccDscaff12-augustus-gene-293.23,VaccDscaff23-augustus-gene-100.23,VaccDscaff13-augustus-gene-316.17,VaccDscaff21-snap-gene-83.43,VaccDscaff20-augustus-gene-155.11,VaccDscaff1-augustus-gene-18.52,VaccDscaff44-augustus-gene-151.19,VaccDscaff22-processed-gene-12.3,VaccDscaff10-augustus-gene-385.37,Vac…	0.0014026660903450762
Biological process	regulation of protein modification by small protein conjugation or removal	GO:1903320	8	5.223946008781066E-5	12.56911544227886	5	145	115	41918	VaccDscaff44-augustus-gene-94.24,VaccDscaff20-augustus-gene-262.18,VaccDscaff118-snap-gene-3.94,VaccDscaff914-snap-gene-0.19,VaccDscaff6-augustus-gene-154.23,	0.0019904573766791446
Biological process	metal ion transport	GO:0030001	7	5.610788835541669E-5	3.944140824087505	12	1109	115	41918	VaccDscaff12-augustus-gene-293.23,VaccDscaff23-augustus-gene-100.23,VaccDscaff26-processed-gene-123.26,VaccDscaff86-augustus-gene-5.56,VaccDscaff29-augustus-gene-121.23,VaccDscaff19-augustus-gene-322.30,VaccDscaff34-processed-gene-228.1,VaccDscaff21-snap-gene-120.36,VaccDscaff21-augustus-gene-28.21,VaccDscaff165-augustus-gene-2.35,VaccDscaff33-augustus-gene-216.27,VaccDscaff5-augustus-gene-192.33,	0.00208440805240373
Biological process	monoatomic ion transport	GO:0006811	5	7.060428153959908E-5	2.609193613644144	20	2794	115	41918	VaccDscaff12-augustus-gene-293.23,VaccDscaff176-snap-gene-1.71,VaccDscaff23-augustus-gene-100.23,VaccDscaff35-augustus-gene-320.55,VaccDscaff20-augustus-gene-155.11,VaccDscaff26-processed-gene-123.26,VaccDscaff86-augustus-gene-5.56,VaccDscaff29-augustus-gene-121.23,VaccDscaff3-augustus-gene-417.23,VaccDscaff19-augustus-gene-322.30,VaccDscaff34-processed-gene-228.1,VaccDscaff38-augustus-gene-76.18…	0.00255897469189864
Biological process	response to chemical	GO:0042221	3	7.077515551867641E-5	1.6053380271835793	52	11807	115	41918	VaccDscaff2-processed-gene-364.26,VaccDscaff28-snap-gene-344.49,VaccDscaff14-augustus-gene-155.31,VaccDscaff27-augustus-gene-1.22,VaccDscaff43-augustus-gene-61.62,VaccDscaff1-snap-gene-225.37,VaccDscaff303-augustus-gene-0.44,VaccDscaff47-augustus-gene-134.35,VaccDscaff5-augustus-gene-295.34,VaccDscaff31-processed-gene-29.14,VaccDscaff13-augustus-gene-316.17,VaccDscaff29-augustus-gene-100.28,VaccD…	0.0025040924071607893
Biological process	response to bacterium	GO:0009617	6	7.64539084218141E-5	3.0233642121396533	16	1929	115	41918	VaccDscaff2-processed-gene-364.26,VaccDscaff12-augustus-gene-293.23,VaccDscaff23-augustus-gene-100.23,VaccDscaff13-augustus-gene-316.17,VaccDscaff21-snap-gene-83.43,VaccDscaff20-augustus-gene-155.11,VaccDscaff22-augustus-gene-298.44,VaccDscaff21-augustus-gene-152.24,VaccDscaff42-augustus-gene-124.16,VaccDscaff46-snap-gene-201.32,VaccDscaff12-augustus-gene-22.23,VaccDscaff15-augustus-gene-216.27,V…	0.0026421048352282734
Biological process	biological regulation	GO:0065007	2	8.563744036871324E-5	1.3993981573785998	72	18754	115	41918	VaccDscaff2-processed-gene-364.26,VaccDscaff44-augustus-gene-94.24,VaccDscaff28-snap-gene-344.49,VaccDscaff14-augustus-gene-155.31,VaccDscaff30-snap-gene-127.34,VaccDscaff1-snap-gene-225.37,VaccDscaff12-augustus-gene-293.23,VaccDscaff47-augustus-gene-134.35,VaccDscaff20-augustus-gene-262.18,VaccDscaff23-augustus-gene-100.23,VaccDscaff31-processed-gene-29.14,VaccDscaff13-augustus-gene-316.17,VaccD…	0.002892209917906997
Biological process	plant organ development	GO:0099402	4	9.160816690256812E-5	2.2954878897470707	24	3811	115	41918	VaccDscaff2-processed-gene-364.26,VaccDscaff1277-augustus-gene-0.5,VaccDscaff14-augustus-gene-155.31,VaccDscaff34-processed-gene-95.3,VaccDscaff20-augustus-gene-155.11,VaccDscaff26-processed-gene-123.26,VaccDscaff17-augustus-gene-368.23,VaccDscaff47-augustus-gene-158.17,VaccDscaff29-augustus-gene-121.23,VaccDscaff46-snap-gene-201.32,VaccDscaff27-augustus-gene-332.27,VaccDscaff38-augustus-gene-76.…	0.0030251052448270273
Biological process	positive regulation of cellular catabolic process	GO:0031331	7	9.342712251159124E-5	5.651230198854061	8	516	115	41918	VaccDscaff44-augustus-gene-94.24,VaccDscaff20-augustus-gene-262.18,VaccDscaff118-snap-gene-3.94,VaccDscaff22-processed-gene-12.3,VaccDscaff22-augustus-gene-298.44,VaccDscaff914-snap-gene-0.19,VaccDscaff1437-augustus-gene-0.6,VaccDscaff14-processed-gene-5.4,	0.003018102262004882
Biological process	response to stimulus	GO:0050896	2	9.772958090725758E-5	1.372105304504945	75	19924	115	41918	VaccDscaff2-processed-gene-364.26,VaccDscaff28-snap-gene-344.49,VaccDscaff14-augustus-gene-155.31,VaccDscaff27-augustus-gene-1.22,VaccDscaff43-augustus-gene-61.62,VaccDscaff30-snap-gene-127.34,VaccDscaff1-snap-gene-225.37,VaccDscaff303-augustus-gene-0.44,VaccDscaff12-augustus-gene-293.23,VaccDscaff47-augustus-gene-134.35,VaccDscaff23-augustus-gene-100.23,VaccDscaff5-augustus-gene-295.34,VaccDscaf…	0.0030899182388975485
Biological process	response to osmotic stress	GO:0006970	4	1.0123378002746541E-4	2.720181700194679	18	2412	115	41918	VaccDscaff2-processed-gene-364.26,VaccDscaff28-snap-gene-344.49,VaccDscaff14-augustus-gene-155.31,VaccDscaff5-augustus-gene-295.34,VaccDscaff31-processed-gene-29.14,VaccDscaff20-augustus-gene-155.11,VaccDscaff1-augustus-gene-18.52,VaccDscaff10-augustus-gene-385.37,VaccDscaff22-augustus-gene-298.44,VaccDscaff46-snap-gene-201.32,VaccDscaff39-augustus-gene-89.22,VaccDscaff5-augustus-gene-16.30,VaccD…	0.003134029106683617
Biological process	localization	GO:0051179	2	1.020136619369616E-4	1.789710382124813	39	7943	115	41918	VaccDscaff2-processed-gene-364.26,VaccDscaff27-augustus-gene-1.22,VaccDscaff12-augustus-gene-293.23,VaccDscaff47-augustus-gene-134.35,VaccDscaff176-snap-gene-1.71,VaccDscaff23-augustus-gene-100.23,VaccDscaff35-augustus-gene-320.55,VaccDscaff34-processed-gene-95.3,VaccDscaff20-augustus-gene-155.11,VaccDscaff44-augustus-gene-118.31,VaccDscaff26-processed-gene-123.26,VaccDscaff86-augustus-gene-5.56,…	0.003093720441598468
Biological process	response to external stimulus	GO:0009605	3	1.0993625968225285E-4	1.9541194723462525	32	5969	115	41918	VaccDscaff2-processed-gene-364.26,VaccDscaff28-snap-gene-344.49,VaccDscaff14-augustus-gene-155.31,VaccDscaff30-snap-gene-127.34,VaccDscaff12-augustus-gene-293.23,VaccDscaff23-augustus-gene-100.23,VaccDscaff13-augustus-gene-316.17,VaccDscaff21-snap-gene-83.43,VaccDscaff20-augustus-gene-155.11,VaccDscaff1-augustus-gene-18.52,VaccDscaff32-processed-gene-84.20,VaccDscaff44-augustus-gene-151.19,VaccDs…	0.0032673056377565545
Biological process	positive regulation of catabolic process	GO:0009896	6	1.2285492450980762E-4	5.430232369848595	8	537	115	41918	VaccDscaff44-augustus-gene-94.24,VaccDscaff20-augustus-gene-262.18,VaccDscaff118-snap-gene-3.94,VaccDscaff22-processed-gene-12.3,VaccDscaff22-augustus-gene-298.44,VaccDscaff914-snap-gene-0.19,VaccDscaff1437-augustus-gene-0.6,VaccDscaff14-processed-gene-5.4,	0.0035796552514034143
Biological process	response to metal ion	GO:0010038	5	1.3016852477187868E-4	3.024095806079261	15	1808	115	41918	VaccDscaff43-augustus-gene-61.62,VaccDscaff47-augustus-gene-134.35,VaccDscaff26-processed-gene-123.26,VaccDscaff13-augustus-gene-69.34,VaccDscaff21-augustus-gene-152.24,VaccDscaff29-augustus-gene-121.23,VaccDscaff47-snap-gene-141.41,VaccDscaff32-augustus-gene-296.23,VaccDscaff34-processed-gene-228.1,VaccDscaff21-snap-gene-120.36,VaccDscaff15-augustus-gene-216.27,VaccDscaff165-augustus-gene-2.35,V…	0.003719815919442533
Biological process	phyllome development	GO:0048827	5	1.3783255919785908E-4	2.8729406725208824	16	2030	115	41918	VaccDscaff2-processed-gene-364.26,VaccDscaff1277-augustus-gene-0.5,VaccDscaff14-augustus-gene-155.31,VaccDscaff26-processed-gene-123.26,VaccDscaff29-augustus-gene-121.23,VaccDscaff46-snap-gene-201.32,VaccDscaff38-augustus-gene-76.18,VaccDscaff21-snap-gene-120.36,VaccDscaff20-augustus-gene-121.18,VaccDscaff7-augustus-gene-400.36,VaccDscaff165-augustus-gene-2.35,VaccDscaff33-augustus-gene-216.27,Va…	0.00386451288618903
Biological process	transport	GO:0006810	4	1.4076508187466086E-4	1.8270894627874035	36	7182	115	41918	VaccDscaff2-processed-gene-364.26,VaccDscaff27-augustus-gene-1.22,VaccDscaff12-augustus-gene-293.23,VaccDscaff47-augustus-gene-134.35,VaccDscaff176-snap-gene-1.71,VaccDscaff23-augustus-gene-100.23,VaccDscaff35-augustus-gene-320.55,VaccDscaff34-processed-gene-95.3,VaccDscaff20-augustus-gene-155.11,VaccDscaff44-augustus-gene-118.31,VaccDscaff26-processed-gene-123.26,VaccDscaff86-augustus-gene-5.56,…	0.00387364651232863
Biological process	response to fungus	GO:0009620	6	1.6698914225654615E-4	3.2906642512077293	13	1440	115	41918	VaccDscaff2-processed-gene-364.26,VaccDscaff14-augustus-gene-155.31,VaccDscaff13-augustus-gene-316.17,VaccDscaff21-snap-gene-83.43,VaccDscaff1-augustus-gene-18.52,VaccDscaff22-processed-gene-12.3,VaccDscaff10-augustus-gene-385.37,VaccDscaff22-augustus-gene-298.44,VaccDscaff21-augustus-gene-152.24,VaccDscaff46-snap-gene-201.32,VaccDscaff5-augustus-gene-16.30,VaccDscaff1437-augustus-gene-0.6,VaccDs…	0.004511743007149592
Biological process	establishment of localization	GO:0051234	3	1.8322316685215334E-4	1.8037328552218737	36	7275	115	41918	VaccDscaff2-processed-gene-364.26,VaccDscaff27-augustus-gene-1.22,VaccDscaff12-augustus-gene-293.23,VaccDscaff47-augustus-gene-134.35,VaccDscaff176-snap-gene-1.71,VaccDscaff23-augustus-gene-100.23,VaccDscaff35-augustus-gene-320.55,VaccDscaff34-processed-gene-95.3,VaccDscaff20-augustus-gene-155.11,VaccDscaff44-augustus-gene-118.31,VaccDscaff26-processed-gene-123.26,VaccDscaff86-augustus-gene-5.56,…	0.004861957606112498
Biological process	monoatomic cation transport	GO:0006812	6	2.2365298151072466E-4	3.021350426030324	14	1689	115	41918	VaccDscaff12-augustus-gene-293.23,VaccDscaff176-snap-gene-1.71,VaccDscaff23-augustus-gene-100.23,VaccDscaff35-augustus-gene-320.55,VaccDscaff26-processed-gene-123.26,VaccDscaff86-augustus-gene-5.56,VaccDscaff29-augustus-gene-121.23,VaccDscaff19-augustus-gene-322.30,VaccDscaff34-processed-gene-228.1,VaccDscaff21-snap-gene-120.36,VaccDscaff21-augustus-gene-28.21,VaccDscaff165-augustus-gene-2.35,Vac…	0.005830672465349769
Biological process	system development	GO:0048731	4	2.7831718217219414E-4	1.788038146308766	35	7135	115	41918	VaccDscaff2-processed-gene-364.26,VaccDscaff1277-augustus-gene-0.5,VaccDscaff14-augustus-gene-155.31,VaccDscaff30-snap-gene-127.34,VaccDscaff6-snap-gene-255.21,VaccDscaff47-augustus-gene-134.35,VaccDscaff35-augustus-gene-320.55,VaccDscaff34-processed-gene-95.3,VaccDscaff20-augustus-gene-155.11,VaccDscaff26-processed-gene-123.26,VaccDscaff17-augustus-gene-368.23,VaccDscaff32-processed-gene-84.20,V…	0.00713067815013587
Biological process	photosynthesis	GO:0015979	4	3.7397622174362155E-4	5.3156884057971014	7	480	115	41918	VaccDscaff26-processed-gene-123.26,VaccDscaff29-augustus-gene-121.23,VaccDscaff21-snap-gene-44.52,VaccDscaff21-snap-gene-120.36,VaccDscaff165-augustus-gene-2.35,VaccDscaff33-augustus-gene-216.27,VaccDscaff5-augustus-gene-192.33,	0.008821089928746376
Biological process	secondary metabolite biosynthetic process	GO:0044550	4	4.4543576883371294E-4	3.6450434782608694	10	1000	115	41918	VaccDscaff2-processed-gene-364.26,VaccDscaff43-augustus-gene-61.62,VaccDscaff6-snap-gene-255.21,VaccDscaff35-augustus-gene-320.55,VaccDscaff22-augustus-gene-298.44,VaccDscaff47-snap-gene-141.41,VaccDscaff21-augustus-gene-18.55,VaccDscaff12-snap-gene-335.42,VaccDscaff12-processed-gene-300.7,VaccDscaff14-processed-gene-313.4,	0.00987936645502832
Biological process	shoot system development	GO:0048367	5	4.93676057909731E-4	2.252808082979524	20	3236	115	41918	VaccDscaff2-processed-gene-364.26,VaccDscaff1277-augustus-gene-0.5,VaccDscaff14-augustus-gene-155.31,VaccDscaff20-augustus-gene-155.11,VaccDscaff26-processed-gene-123.26,VaccDscaff47-augustus-gene-158.17,VaccDscaff29-augustus-gene-121.23,VaccDscaff46-snap-gene-201.32,VaccDscaff38-augustus-gene-76.18,VaccDscaff21-snap-gene-120.36,VaccDscaff20-augustus-gene-121.18,VaccDscaff7-augustus-gene-400.36,V…	0.01078827385373324
Biological process	positive regulation of protein modification process	GO:0031401	8	5.874479507733676E-4	4.925734430082256	7	518	115	41918	VaccDscaff2-processed-gene-364.26,VaccDscaff44-augustus-gene-94.24,VaccDscaff20-augustus-gene-262.18,VaccDscaff118-snap-gene-3.94,VaccDscaff914-snap-gene-0.19,VaccDscaff6-augustus-gene-154.23,VaccDscaff14-processed-gene-313.4,	0.012124272984017005
Biological process	response to oxygen-containing compound	GO:1901700	4	6.979124573607276E-4	1.7662233692360363	32	6604	115	41918	VaccDscaff2-processed-gene-364.26,VaccDscaff28-snap-gene-344.49,VaccDscaff14-augustus-gene-155.31,VaccDscaff1-snap-gene-225.37,VaccDscaff303-augustus-gene-0.44,VaccDscaff47-augustus-gene-134.35,VaccDscaff5-augustus-gene-295.34,VaccDscaff31-processed-gene-29.14,VaccDscaff29-augustus-gene-100.28,VaccDscaff20-augustus-gene-155.11,VaccDscaff26-processed-gene-123.26,VaccDscaff22-processed-gene-12.3,Va…	0.01364602515313212
Biological process	positive regulation of proteolysis	GO:0045862	8	7.009156459670818E-4	7.175282437521397	5	254	115	41918	VaccDscaff44-augustus-gene-94.24,VaccDscaff20-augustus-gene-262.18,VaccDscaff118-snap-gene-3.94,VaccDscaff914-snap-gene-0.19,VaccDscaff6-augustus-gene-154.23,	0.01352676168710498
Biological process	response to salt stress	GO:0009651	5	7.421553348578858E-4	2.564524023166653	15	2132	115	41918	VaccDscaff2-processed-gene-364.26,VaccDscaff14-augustus-gene-155.31,VaccDscaff5-augustus-gene-295.34,VaccDscaff1-augustus-gene-18.52,VaccDscaff10-augustus-gene-385.37,VaccDscaff22-augustus-gene-298.44,VaccDscaff46-snap-gene-201.32,VaccDscaff39-augustus-gene-89.22,VaccDscaff5-augustus-gene-16.30,VaccDscaff21-snap-gene-44.52,VaccDscaff38-augustus-gene-76.18,VaccDscaff964-augustus-gene-0.8,VaccDscaf…	0.014139010610241259
Biological process	response to light stimulus	GO:0009416	5	8.58872975322722E-4	2.4330703234115107	16	2397	115	41918	VaccDscaff30-snap-gene-127.34,VaccDscaff29-augustus-gene-100.28,VaccDscaff32-processed-gene-84.20,VaccDscaff22-processed-gene-12.3,VaccDscaff42-augustus-gene-124.16,VaccDscaff46-snap-gene-201.32,VaccDscaff12-processed-gene-28.5,VaccDscaff19-augustus-gene-322.30,VaccDscaff21-snap-gene-44.52,VaccDscaff1023-snap-gene-0.8,VaccDscaff1437-augustus-gene-0.6,VaccDscaff20-augustus-gene-121.18,VaccDscaff14…	0.01615550938391854
Biological process	defense response to fungus	GO:0050832	7	9.495652681046352E-4	3.3016698172652803	10	1104	115	41918	VaccDscaff14-augustus-gene-155.31,VaccDscaff13-augustus-gene-316.17,VaccDscaff1-augustus-gene-18.52,VaccDscaff22-processed-gene-12.3,VaccDscaff10-augustus-gene-385.37,VaccDscaff22-augustus-gene-298.44,VaccDscaff21-augustus-gene-152.24,VaccDscaff46-snap-gene-201.32,VaccDscaff5-augustus-gene-16.30,VaccDscaff1437-augustus-gene-0.6,	0.017420419609919604
Biological process	response to hydrogen peroxide	GO:0042542	6	0.00111018523232298	5.194836311060622	6	421	115	41918	VaccDscaff22-processed-gene-12.3,VaccDscaff46-snap-gene-201.32,VaccDscaff1437-augustus-gene-0.6,VaccDscaff165-augustus-gene-2.35,VaccDscaff29-augustus-gene-27.40,VaccDscaff5-augustus-gene-192.33,	0.019639705419427955
Biological process	regulation of cellular catabolic process	GO:0031329	6	0.001145360390077843	3.872556152202783	8	753	115	41918	VaccDscaff44-augustus-gene-94.24,VaccDscaff20-augustus-gene-262.18,VaccDscaff118-snap-gene-3.94,VaccDscaff22-processed-gene-12.3,VaccDscaff22-augustus-gene-298.44,VaccDscaff914-snap-gene-0.19,VaccDscaff1437-augustus-gene-0.6,VaccDscaff14-processed-gene-5.4,	0.020023594584184408
Biological process	response to stress	GO:0006950	3	0.0013886309810329234	1.4936041332620702	46	11226	115	41918	VaccDscaff2-processed-gene-364.26,VaccDscaff28-snap-gene-344.49,VaccDscaff14-augustus-gene-155.31,VaccDscaff5-augustus-gene-295.34,VaccDscaff31-processed-gene-29.14,VaccDscaff13-augustus-gene-316.17,VaccDscaff29-augustus-gene-100.28,VaccDscaff4-augustus-gene-300.26,VaccDscaff21-snap-gene-83.43,VaccDscaff34-processed-gene-95.3,VaccDscaff20-augustus-gene-155.11,VaccDscaff44-augustus-gene-118.31,Vac…	0.02344892770244232
Biological process	regulation of catabolic process	GO:0009894	5	0.001513051325396253	3.7052538533782666	8	787	115	41918	VaccDscaff44-augustus-gene-94.24,VaccDscaff20-augustus-gene-262.18,VaccDscaff118-snap-gene-3.94,VaccDscaff22-processed-gene-12.3,VaccDscaff22-augustus-gene-298.44,VaccDscaff914-snap-gene-0.19,VaccDscaff1437-augustus-gene-0.6,VaccDscaff14-processed-gene-5.4,	0.024982158550431465
Biological process	positive regulation of cellular metabolic process	GO:0031325	6	0.001549883596882795	2.1618050282931027	18	3035	115	41918	VaccDscaff2-processed-gene-364.26,VaccDscaff44-augustus-gene-94.24,VaccDscaff28-snap-gene-344.49,VaccDscaff14-augustus-gene-155.31,VaccDscaff30-snap-gene-127.34,VaccDscaff20-augustus-gene-262.18,VaccDscaff32-processed-gene-84.20,VaccDscaff118-snap-gene-3.94,VaccDscaff22-processed-gene-12.3,VaccDscaff22-augustus-gene-298.44,VaccDscaff914-snap-gene-0.19,VaccDscaff21-snap-gene-44.52,VaccDscaff6-augu…	0.02530908818645971
Biological process	positive regulation of metabolic process	GO:0009893	5	0.0017044501096702414	2.087276253374217	19	3318	115	41918	VaccDscaff2-processed-gene-364.26,VaccDscaff44-augustus-gene-94.24,VaccDscaff28-snap-gene-344.49,VaccDscaff14-augustus-gene-155.31,VaccDscaff30-snap-gene-127.34,VaccDscaff20-augustus-gene-262.18,VaccDscaff44-augustus-gene-118.31,VaccDscaff32-processed-gene-84.20,VaccDscaff118-snap-gene-3.94,VaccDscaff22-processed-gene-12.3,VaccDscaff22-augustus-gene-298.44,VaccDscaff914-snap-gene-0.19,VaccDscaff2…	0.027234546913655688
Biological process	response to radiation	GO:0009314	4	0.0018326817910243598	2.261368578990846	16	2579	115	41918	VaccDscaff30-snap-gene-127.34,VaccDscaff29-augustus-gene-100.28,VaccDscaff32-processed-gene-84.20,VaccDscaff22-processed-gene-12.3,VaccDscaff42-augustus-gene-124.16,VaccDscaff46-snap-gene-201.32,VaccDscaff12-processed-gene-28.5,VaccDscaff19-augustus-gene-322.30,VaccDscaff21-snap-gene-44.52,VaccDscaff1023-snap-gene-0.8,VaccDscaff1437-augustus-gene-0.6,VaccDscaff20-augustus-gene-121.18,VaccDscaff14…	0.02897196959002339
Biological process	cellular localization	GO:0051641	3	0.0019282013917432117	2.064872572658215	19	3354	115	41918	VaccDscaff12-augustus-gene-293.23,VaccDscaff47-augustus-gene-134.35,VaccDscaff23-augustus-gene-100.23,VaccDscaff34-processed-gene-95.3,VaccDscaff44-augustus-gene-118.31,VaccDscaff26-processed-gene-123.26,VaccDscaff26-snap-gene-123.44,VaccDscaff29-augustus-gene-121.23,VaccDscaff34-processed-gene-228.1,VaccDscaff6-augustus-gene-154.23,VaccDscaff21-snap-gene-120.36,VaccDscaff165-augustus-gene-2.35,V…	0.03016112913821487
Biological process	defense response to other organism	GO:0098542	6	0.0021333022247547184	2.046566964744578	19	3384	115	41918	VaccDscaff2-processed-gene-364.26,VaccDscaff14-augustus-gene-155.31,VaccDscaff13-augustus-gene-316.17,VaccDscaff21-snap-gene-83.43,VaccDscaff20-augustus-gene-155.11,VaccDscaff1-augustus-gene-18.52,VaccDscaff44-augustus-gene-151.19,VaccDscaff22-processed-gene-12.3,VaccDscaff10-augustus-gene-385.37,VaccDscaff22-augustus-gene-298.44,VaccDscaff21-augustus-gene-152.24,VaccDscaff42-augustus-gene-124.16…	0.03302174068734908
Biological process	post-embryonic development	GO:0009791	3	0.002254401980197218	1.707969960729766	29	6189	115	41918	VaccDscaff2-processed-gene-364.26,VaccDscaff14-augustus-gene-155.31,VaccDscaff30-snap-gene-127.34,VaccDscaff6-snap-gene-255.21,VaccDscaff31-processed-gene-29.14,VaccDscaff35-augustus-gene-320.55,VaccDscaff34-processed-gene-95.3,VaccDscaff20-augustus-gene-155.11,VaccDscaff26-processed-gene-123.26,VaccDscaff32-processed-gene-84.20,VaccDscaff47-augustus-gene-158.17,VaccDscaff22-processed-gene-12.3,V…	0.034536508686320265
Biological process	obsolete multi-organism process	GO:0051704	0	0.0025065517510871604	1.7674586056468222	26	5362	115	41918	VaccDscaff2-processed-gene-364.26,VaccDscaff28-snap-gene-344.49,VaccDscaff12-augustus-gene-293.23,VaccDscaff23-augustus-gene-100.23,VaccDscaff13-augustus-gene-316.17,VaccDscaff21-snap-gene-83.43,VaccDscaff20-augustus-gene-155.11,VaccDscaff1-augustus-gene-18.52,VaccDscaff44-augustus-gene-151.19,VaccDscaff22-processed-gene-12.3,VaccDscaff10-augustus-gene-385.37,VaccDscaff22-augustus-gene-298.44,Vac…	0.038007509205260415
Biological process	reproductive system development	GO:0061458	5	0.002711530867781753	1.8449823943661974	23	4544	115	41918	VaccDscaff2-processed-gene-364.26,VaccDscaff14-augustus-gene-155.31,VaccDscaff30-snap-gene-127.34,VaccDscaff6-snap-gene-255.21,VaccDscaff35-augustus-gene-320.55,VaccDscaff34-processed-gene-95.3,VaccDscaff26-processed-gene-123.26,VaccDscaff32-processed-gene-84.20,VaccDscaff47-augustus-gene-158.17,VaccDscaff22-processed-gene-12.3,VaccDscaff29-augustus-gene-121.23,VaccDscaff12-processed-gene-28.5,Va…	0.039894404648749354
Biological process	reproductive structure development	GO:0048608	4	0.002711530867781753	1.8449823943661974	23	4544	115	41918	VaccDscaff2-processed-gene-364.26,VaccDscaff14-augustus-gene-155.31,VaccDscaff30-snap-gene-127.34,VaccDscaff6-snap-gene-255.21,VaccDscaff35-augustus-gene-320.55,VaccDscaff34-processed-gene-95.3,VaccDscaff26-processed-gene-123.26,VaccDscaff32-processed-gene-84.20,VaccDscaff47-augustus-gene-158.17,VaccDscaff22-processed-gene-12.3,VaccDscaff29-augustus-gene-121.23,VaccDscaff12-processed-gene-28.5,Va…	0.039894404648749354
Biological process	obsolete aging	GO:0007568	0	0.0029029347981133213	4.288286445012788	6	510	115	41918	VaccDscaff2-processed-gene-364.26,VaccDscaff46-snap-gene-201.32,VaccDscaff6-augustus-gene-154.23,VaccDscaff33-augustus-gene-260.30,VaccDscaff14-processed-gene-313.4,VaccDscaff14-processed-gene-5.4,	0.0414784722115038
Biological process	response to toxic substance	GO:0009636	4	0.003041554539730096	3.029122004094906	9	1083	115	41918	VaccDscaff29-augustus-gene-100.28,VaccDscaff44-augustus-gene-118.31,VaccDscaff22-processed-gene-12.3,VaccDscaff46-snap-gene-201.32,VaccDscaff1437-augustus-gene-0.6,VaccDscaff165-augustus-gene-2.35,VaccDscaff29-augustus-gene-27.40,VaccDscaff12-processed-gene-300.7,VaccDscaff5-augustus-gene-192.33,	0.04304523853370402
Biological process	regulation of multicellular organismal development	GO:2000026	5	0.0035727273153479677	2.1826607654256707	15	2505	115	41918	VaccDscaff14-augustus-gene-155.31,VaccDscaff47-augustus-gene-134.35,VaccDscaff31-processed-gene-29.14,VaccDscaff34-processed-gene-95.3,VaccDscaff20-augustus-gene-155.11,VaccDscaff17-augustus-gene-368.23,VaccDscaff21-augustus-gene-152.24,VaccDscaff46-snap-gene-201.32,VaccDscaff27-augustus-gene-332.27,VaccDscaff20-augustus-gene-121.18,VaccDscaff7-augustus-gene-400.36,VaccDscaff11-processed-gene-356…	0.04915808139451
Biological process	leaf senescence	GO:0010150	4	0.00376787320889449	4.065104250848553	6	538	115	41918	VaccDscaff2-processed-gene-364.26,VaccDscaff14-augustus-gene-155.31,VaccDscaff46-snap-gene-201.32,VaccDscaff33-augustus-gene-260.30,VaccDscaff14-processed-gene-313.4,VaccDscaff14-processed-gene-5.4,	0.05136751915979094
Biological process	defense response to bacterium	GO:0042742	7	0.003768786183791728	2.5735223530725007	11	1558	115	41918	VaccDscaff2-processed-gene-364.26,VaccDscaff13-augustus-gene-316.17,VaccDscaff21-snap-gene-83.43,VaccDscaff20-augustus-gene-155.11,VaccDscaff22-augustus-gene-298.44,VaccDscaff21-augustus-gene-152.24,VaccDscaff42-augustus-gene-124.16,VaccDscaff46-snap-gene-201.32,VaccDscaff15-augustus-gene-216.27,VaccDscaff11-processed-gene-71.4,VaccDscaff14-processed-gene-313.4,	0.05091287517376825
Biological process	multicellular organism development	GO:0007275	4	0.003993937712951201	1.4930857646483973	39	9521	115	41918	VaccDscaff2-processed-gene-364.26,VaccDscaff1277-augustus-gene-0.5,VaccDscaff14-augustus-gene-155.31,VaccDscaff30-snap-gene-127.34,VaccDscaff6-snap-gene-255.21,VaccDscaff47-augustus-gene-134.35,VaccDscaff31-processed-gene-29.14,VaccDscaff35-augustus-gene-320.55,VaccDscaff34-processed-gene-95.3,VaccDscaff20-augustus-gene-155.11,VaccDscaff26-processed-gene-123.26,VaccDscaff17-augustus-gene-368.23,V…	0.05299099501290611
Biological process	plant organ senescence	GO:0090693	3	0.004690247701215289	3.8845934048961306	6	563	115	41918	VaccDscaff2-processed-gene-364.26,VaccDscaff14-augustus-gene-155.31,VaccDscaff46-snap-gene-201.32,VaccDscaff33-augustus-gene-260.30,VaccDscaff14-processed-gene-313.4,VaccDscaff14-processed-gene-5.4,	0.06113779021057824
Biological process	secondary metabolic process	GO:0019748	3	0.004906856512661872	2.629901499466717	10	1386	115	41918	VaccDscaff2-processed-gene-364.26,VaccDscaff43-augustus-gene-61.62,VaccDscaff6-snap-gene-255.21,VaccDscaff35-augustus-gene-320.55,VaccDscaff22-augustus-gene-298.44,VaccDscaff47-snap-gene-141.41,VaccDscaff21-augustus-gene-18.55,VaccDscaff12-snap-gene-335.42,VaccDscaff12-processed-gene-300.7,VaccDscaff14-processed-gene-313.4,	0.06285852394668572
Biological process	regulation of proteolysis	GO:0030162	7	0.0051022751644818065	3.816799453676303	6	573	115	41918	VaccDscaff44-augustus-gene-94.24,VaccDscaff20-augustus-gene-262.18,VaccDscaff118-snap-gene-3.94,VaccDscaff914-snap-gene-0.19,VaccDscaff6-augustus-gene-154.23,VaccDscaff40-snap-gene-16.49,	0.06480325550786295
Biological process	defense response	GO:0006952	4	0.005350737689941876	1.8432583960864068	20	3955	115	41918	VaccDscaff2-processed-gene-364.26,VaccDscaff14-augustus-gene-155.31,VaccDscaff13-augustus-gene-316.17,VaccDscaff21-snap-gene-83.43,VaccDscaff20-augustus-gene-155.11,VaccDscaff44-augustus-gene-118.31,VaccDscaff1-augustus-gene-18.52,VaccDscaff44-augustus-gene-151.19,VaccDscaff22-processed-gene-12.3,VaccDscaff10-augustus-gene-385.37,VaccDscaff22-augustus-gene-298.44,VaccDscaff21-augustus-gene-152.24…	0.06517373940371826
Biological process	innate immune response	GO:0045087	7	0.005506841190881628	2.444846235418876	11	1640	115	41918	VaccDscaff2-processed-gene-364.26,VaccDscaff13-augustus-gene-316.17,VaccDscaff1-augustus-gene-18.52,VaccDscaff44-augustus-gene-151.19,VaccDscaff22-processed-gene-12.3,VaccDscaff10-augustus-gene-385.37,VaccDscaff42-augustus-gene-124.16,VaccDscaff5-augustus-gene-16.30,VaccDscaff6-augustus-gene-154.23,VaccDscaff1437-augustus-gene-0.6,VaccDscaff14-processed-gene-313.4,	0.06599327427137176
Biological process	cellular response to chemical stress	GO:0062197	5	0.006498238624589203	3.6269089335929046	6	603	115	41918	VaccDscaff31-processed-gene-29.14,VaccDscaff29-augustus-gene-100.28,VaccDscaff20-augustus-gene-155.11,VaccDscaff21-snap-gene-44.52,VaccDscaff34-processed-gene-228.1,VaccDscaff15-augustus-gene-216.27,	0.07603450863102013
Biological process	positive regulation of macromolecule metabolic process	GO:0010604	6	0.0070460563181172775	1.9682988745249381	16	2963	115	41918	VaccDscaff2-processed-gene-364.26,VaccDscaff44-augustus-gene-94.24,VaccDscaff28-snap-gene-344.49,VaccDscaff14-augustus-gene-155.31,VaccDscaff30-snap-gene-127.34,VaccDscaff20-augustus-gene-262.18,VaccDscaff44-augustus-gene-118.31,VaccDscaff32-processed-gene-84.20,VaccDscaff118-snap-gene-3.94,VaccDscaff914-snap-gene-0.19,VaccDscaff21-snap-gene-44.52,VaccDscaff6-augustus-gene-154.23,VaccDscaff1023-s…	0.08180031006814277
Biological process	regulation of multicellular organismal process	GO:0051239	4	0.007898364120142998	1.944023188405797	16	3000	115	41918	VaccDscaff14-augustus-gene-155.31,VaccDscaff47-augustus-gene-134.35,VaccDscaff31-processed-gene-29.14,VaccDscaff34-processed-gene-95.3,VaccDscaff20-augustus-gene-155.11,VaccDscaff17-augustus-gene-368.23,VaccDscaff21-augustus-gene-152.24,VaccDscaff46-snap-gene-201.32,VaccDscaff27-augustus-gene-332.27,VaccDscaff6-augustus-gene-154.23,VaccDscaff20-augustus-gene-121.18,VaccDscaff7-augustus-gene-400.3…	0.08891643244342799
Biological process	positive regulation of biological process	GO:0048518	4	0.00800105853645372	1.6413200100238066	25	5552	115	41918	VaccDscaff2-processed-gene-364.26,VaccDscaff44-augustus-gene-94.24,VaccDscaff28-snap-gene-344.49,VaccDscaff14-augustus-gene-155.31,VaccDscaff30-snap-gene-127.34,VaccDscaff47-augustus-gene-134.35,VaccDscaff20-augustus-gene-262.18,VaccDscaff13-augustus-gene-316.17,VaccDscaff44-augustus-gene-118.31,VaccDscaff32-processed-gene-84.20,VaccDscaff118-snap-gene-3.94,VaccDscaff22-processed-gene-12.3,VaccDs…	0.08939528560278366
Biological process	regulation of protein modification process	GO:0031399	7	0.008701353182123062	3.0303211814520297	7	842	115	41918	VaccDscaff2-processed-gene-364.26,VaccDscaff44-augustus-gene-94.24,VaccDscaff20-augustus-gene-262.18,VaccDscaff118-snap-gene-3.94,VaccDscaff914-snap-gene-0.19,VaccDscaff6-augustus-gene-154.23,VaccDscaff14-processed-gene-313.4,	0.0957793394713694
Biological process	positive regulation of protein metabolic process	GO:0051247	7	0.009528804793744627	2.9772817208665217	7	857	115	41918	VaccDscaff2-processed-gene-364.26,VaccDscaff44-augustus-gene-94.24,VaccDscaff20-augustus-gene-262.18,VaccDscaff118-snap-gene-3.94,VaccDscaff914-snap-gene-0.19,VaccDscaff6-augustus-gene-154.23,VaccDscaff14-processed-gene-313.4,	0.10335623301828113
Biological process	response to temperature stimulus	GO:0009266	4	0.009600739813439674	2.083797942717296	13	2274	115	41918	VaccDscaff14-augustus-gene-155.31,VaccDscaff22-processed-gene-12.3,VaccDscaff22-augustus-gene-298.44,VaccDscaff21-augustus-gene-152.24,VaccDscaff8-snap-gene-296.44,VaccDscaff46-snap-gene-201.32,VaccDscaff39-augustus-gene-89.22,VaccDscaff1437-augustus-gene-0.6,VaccDscaff14-augustus-gene-22.26,VaccDscaff15-augustus-gene-216.27,VaccDscaff165-augustus-gene-2.35,VaccDscaff29-augustus-gene-27.40,VaccDs…	0.10338187944037214
Biological process	positive regulation of nitrogen compound metabolic process	GO:0051173	6	0.009934668512770917	1.9471386101820884	15	2808	115	41918	VaccDscaff2-processed-gene-364.26,VaccDscaff44-augustus-gene-94.24,VaccDscaff28-snap-gene-344.49,VaccDscaff14-augustus-gene-155.31,VaccDscaff30-snap-gene-127.34,VaccDscaff20-augustus-gene-262.18,VaccDscaff32-processed-gene-84.20,VaccDscaff118-snap-gene-3.94,VaccDscaff914-snap-gene-0.19,VaccDscaff21-snap-gene-44.52,VaccDscaff6-augustus-gene-154.23,VaccDscaff1023-snap-gene-0.8,VaccDscaff5-augustus-…	0.10620803892070203
Biological process	response to wounding	GO:0009611	4	0.010381273129726476	2.6801790281329927	8	1088	115	41918	VaccDscaff2-processed-gene-364.26,VaccDscaff14-augustus-gene-155.31,VaccDscaff34-processed-gene-95.3,VaccDscaff44-augustus-gene-151.19,VaccDscaff46-snap-gene-201.32,VaccDscaff38-augustus-gene-76.18,VaccDscaff17-processed-gene-284.6,VaccDscaff14-processed-gene-313.4,	0.11018979907695388
Biological process	immune response	GO:0006955	3	0.010522398579647652	2.2324876537232496	11	1796	115	41918	VaccDscaff2-processed-gene-364.26,VaccDscaff13-augustus-gene-316.17,VaccDscaff1-augustus-gene-18.52,VaccDscaff44-augustus-gene-151.19,VaccDscaff22-processed-gene-12.3,VaccDscaff10-augustus-gene-385.37,VaccDscaff42-augustus-gene-124.16,VaccDscaff5-augustus-gene-16.30,VaccDscaff6-augustus-gene-154.23,VaccDscaff1437-augustus-gene-0.6,VaccDscaff14-processed-gene-313.4,	0.10934464538011476
Biological process	response to cold	GO:0009409	5	0.011478534582726296	2.3157836583614166	10	1574	115	41918	VaccDscaff14-augustus-gene-155.31,VaccDscaff22-augustus-gene-298.44,VaccDscaff21-augustus-gene-152.24,VaccDscaff8-snap-gene-296.44,VaccDscaff46-snap-gene-201.32,VaccDscaff39-augustus-gene-89.22,VaccDscaff14-augustus-gene-22.26,VaccDscaff15-augustus-gene-216.27,VaccDscaff165-augustus-gene-2.35,VaccDscaff5-augustus-gene-192.33,	0.10727737352158036
Biological process	multicellular organismal process	GO:0032501	2	0.011636901374113662	1.3858195716681718	41	10784	115	41918	VaccDscaff2-processed-gene-364.26,VaccDscaff1277-augustus-gene-0.5,VaccDscaff14-augustus-gene-155.31,VaccDscaff30-snap-gene-127.34,VaccDscaff6-snap-gene-255.21,VaccDscaff47-augustus-gene-134.35,VaccDscaff31-processed-gene-29.14,VaccDscaff35-augustus-gene-320.55,VaccDscaff34-processed-gene-95.3,VaccDscaff20-augustus-gene-155.11,VaccDscaff44-augustus-gene-118.31,VaccDscaff26-processed-gene-123.26,V…	0.10740643131635343
Biological process	cellular response to abiotic stimulus	GO:0071214	5	0.011710846519216833	3.192738813075214	6	685	115	41918	VaccDscaff31-processed-gene-29.14,VaccDscaff20-augustus-gene-155.11,VaccDscaff46-snap-gene-201.32,VaccDscaff21-snap-gene-44.52,VaccDscaff15-augustus-gene-216.27,VaccDscaff37-snap-gene-82.39,	0.10742171560219886
Biological process	cellular response to environmental stimulus	GO:0104004	4	0.011710846519216833	3.192738813075214	6	685	115	41918	VaccDscaff31-processed-gene-29.14,VaccDscaff20-augustus-gene-155.11,VaccDscaff46-snap-gene-201.32,VaccDscaff21-snap-gene-44.52,VaccDscaff15-augustus-gene-216.27,VaccDscaff37-snap-gene-82.39,	0.10742171560219886
Biological process	flower development	GO:0009908	7	0.013782981590329868	2.14643887906154	11	1868	115	41918	VaccDscaff2-processed-gene-364.26,VaccDscaff26-processed-gene-123.26,VaccDscaff29-augustus-gene-121.23,VaccDscaff21-snap-gene-120.36,VaccDscaff20-augustus-gene-121.18,VaccDscaff7-augustus-gene-400.36,VaccDscaff11-processed-gene-356.13,VaccDscaff165-augustus-gene-2.35,VaccDscaff33-augustus-gene-216.27,VaccDscaff5-augustus-gene-192.33,VaccDscaff14-processed-gene-313.4,	0.11315751736591262
Biological process	organic hydroxy compound metabolic process	GO:1901615	4	0.014371522064062558	2.363500814434282	9	1388	115	41918	VaccDscaff5-augustus-gene-295.34,VaccDscaff35-augustus-gene-320.55,VaccDscaff44-augustus-gene-118.31,VaccDscaff1-augustus-gene-416.35,VaccDscaff42-augustus-gene-124.16,VaccDscaff8-snap-gene-296.44,VaccDscaff45-augustus-gene-102.32,VaccDscaff7-augustus-gene-400.36,VaccDscaff3-processed-gene-125.13,	0.11606566188694002
Biological process	anatomical structure development	GO:0048856	3	0.01439313522783392	1.3605743519992581	42	11252	115	41918	VaccDscaff2-processed-gene-364.26,VaccDscaff1277-augustus-gene-0.5,VaccDscaff14-augustus-gene-155.31,VaccDscaff30-snap-gene-127.34,VaccDscaff3-processed-gene-159.7,VaccDscaff303-augustus-gene-0.44,VaccDscaff6-snap-gene-255.21,VaccDscaff47-augustus-gene-134.35,VaccDscaff31-processed-gene-29.14,VaccDscaff35-augustus-gene-320.55,VaccDscaff34-processed-gene-95.3,VaccDscaff20-augustus-gene-155.11,Vacc…	0.11561188620843894
Biological process	reproductive shoot system development	GO:0090567	6	0.015457483825247809	2.110288329519451	11	1900	115	41918	VaccDscaff2-processed-gene-364.26,VaccDscaff26-processed-gene-123.26,VaccDscaff29-augustus-gene-121.23,VaccDscaff21-snap-gene-120.36,VaccDscaff20-augustus-gene-121.18,VaccDscaff7-augustus-gene-400.36,VaccDscaff11-processed-gene-356.13,VaccDscaff165-augustus-gene-2.35,VaccDscaff33-augustus-gene-216.27,VaccDscaff5-augustus-gene-192.33,VaccDscaff14-processed-gene-313.4,	0.12349366109848518
Biological process	positive regulation of cellular process	GO:0048522	5	0.017443217312946513	1.645989378307008	20	4429	115	41918	VaccDscaff2-processed-gene-364.26,VaccDscaff44-augustus-gene-94.24,VaccDscaff28-snap-gene-344.49,VaccDscaff14-augustus-gene-155.31,VaccDscaff30-snap-gene-127.34,VaccDscaff47-augustus-gene-134.35,VaccDscaff20-augustus-gene-262.18,VaccDscaff32-processed-gene-84.20,VaccDscaff118-snap-gene-3.94,VaccDscaff22-processed-gene-12.3,VaccDscaff22-augustus-gene-298.44,VaccDscaff914-snap-gene-0.19,VaccDscaff2…	0.1283199055793986
Biological process	regulation of developmental process	GO:0050793	4	0.017973405005144327	1.771050581602609	16	3293	115	41918	VaccDscaff14-augustus-gene-155.31,VaccDscaff47-augustus-gene-134.35,VaccDscaff31-processed-gene-29.14,VaccDscaff34-processed-gene-95.3,VaccDscaff20-augustus-gene-155.11,VaccDscaff17-augustus-gene-368.23,VaccDscaff21-augustus-gene-152.24,VaccDscaff46-snap-gene-201.32,VaccDscaff27-augustus-gene-332.27,VaccDscaff20-augustus-gene-121.18,VaccDscaff7-augustus-gene-400.36,VaccDscaff15-augustus-gene-216.…	0.13156886619529296
Biological process	obsolete oxidation-reduction process	GO:0055114	0	0.018131144397797838	1.731370190847577	17	3579	115	41918	VaccDscaff43-augustus-gene-61.62,VaccDscaff6-snap-gene-255.21,VaccDscaff12-augustus-gene-293.23,VaccDscaff23-augustus-gene-100.23,VaccDscaff13-augustus-gene-316.17,VaccDscaff29-augustus-gene-100.28,VaccDscaff4-augustus-gene-300.26,VaccDscaff11-augustus-gene-205.21,VaccDscaff8-snap-gene-296.44,VaccDscaff47-snap-gene-141.41,VaccDscaff21-augustus-gene-18.55,VaccDscaff7-augustus-gene-400.36,VaccDscaf…	0.13142868573232971
Biological process	developmental process involved in reproduction	GO:0003006	3	0.020029236693300367	1.5556875115976991	23	5389	115	41918	VaccDscaff2-processed-gene-364.26,VaccDscaff14-augustus-gene-155.31,VaccDscaff30-snap-gene-127.34,VaccDscaff6-snap-gene-255.21,VaccDscaff35-augustus-gene-320.55,VaccDscaff34-processed-gene-95.3,VaccDscaff26-processed-gene-123.26,VaccDscaff32-processed-gene-84.20,VaccDscaff47-augustus-gene-158.17,VaccDscaff22-processed-gene-12.3,VaccDscaff29-augustus-gene-121.23,VaccDscaff12-processed-gene-28.5,Va…	0.13843463128485742
Biological process	regulation of DNA-templated transcription	GO:0006355	9	0.020449475805044748	1.5162410475294799	25	6010	115	41918	VaccDscaff2-processed-gene-364.26,VaccDscaff28-snap-gene-344.49,VaccDscaff14-augustus-gene-155.31,VaccDscaff30-snap-gene-127.34,VaccDscaff17-snap-gene-166.24,VaccDscaff17-augustus-gene-368.23,VaccDscaff32-processed-gene-84.20,VaccDscaff47-augustus-gene-158.17,VaccDscaff24-augustus-gene-120.21,VaccDscaff7-processed-gene-67.5,VaccDscaff22-augustus-gene-298.44,VaccDscaff42-augustus-gene-124.16,VaccD…	0.14068481965878007
Biological process	response to light intensity	GO:0009642	6	0.020703488015532012	3.1974065598779555	5	570	115	41918	VaccDscaff22-processed-gene-12.3,VaccDscaff46-snap-gene-201.32,VaccDscaff1437-augustus-gene-0.6,VaccDscaff14-augustus-gene-22.26,VaccDscaff29-augustus-gene-27.40,	0.14177595940590124
Biological process	root development	GO:0048364	5	0.02204369634143244	1.99977447685135	11	2005	115	41918	VaccDscaff14-augustus-gene-155.31,VaccDscaff34-processed-gene-95.3,VaccDscaff20-augustus-gene-155.11,VaccDscaff17-augustus-gene-368.23,VaccDscaff47-augustus-gene-158.17,VaccDscaff46-snap-gene-201.32,VaccDscaff27-augustus-gene-332.27,VaccDscaff20-augustus-gene-121.18,VaccDscaff5-augustus-gene-212.22,VaccDscaff17-processed-gene-284.6,VaccDscaff8-augustus-gene-159.32,	0.137634171274658
Biological process	root system development	GO:0022622	5	0.02233006308832275	1.995792845239899	11	2009	115	41918	VaccDscaff14-augustus-gene-155.31,VaccDscaff34-processed-gene-95.3,VaccDscaff20-augustus-gene-155.11,VaccDscaff17-augustus-gene-368.23,VaccDscaff47-augustus-gene-158.17,VaccDscaff46-snap-gene-201.32,VaccDscaff27-augustus-gene-332.27,VaccDscaff20-augustus-gene-121.18,VaccDscaff5-augustus-gene-212.22,VaccDscaff17-processed-gene-284.6,VaccDscaff8-augustus-gene-159.32,	0.13883880229810713
Biological process	negative regulation of catalytic activity	GO:0043086	5	0.02240649523346494	3.131480651426864	5	582	115	41918	VaccDscaff21-snap-gene-83.43,VaccDscaff33-processed-gene-17.23,VaccDscaff914-snap-gene-0.19,VaccDscaff6-augustus-gene-154.23,VaccDscaff40-snap-gene-16.49,	0.1381578917714892
Biological process	import into cell	GO:0098657	5	0.022552396365317806	3.126109329554777	5	583	115	41918	VaccDscaff12-augustus-gene-293.23,VaccDscaff23-augustus-gene-100.23,VaccDscaff5-augustus-gene-212.22,VaccDscaff11-processed-gene-71.4,VaccDscaff8-augustus-gene-159.32,	0.13848289668951347
Biological process	response to antibiotic	GO:0046677	4	0.023066709265829877	2.312478019515223	8	1261	115	41918	VaccDscaff2-processed-gene-364.26,VaccDscaff22-processed-gene-12.3,VaccDscaff46-snap-gene-201.32,VaccDscaff1437-augustus-gene-0.6,VaccDscaff165-augustus-gene-2.35,VaccDscaff29-augustus-gene-27.40,VaccDscaff5-augustus-gene-192.33,VaccDscaff14-processed-gene-313.4,	0.1410581480206716
Biological process	regulation of RNA biosynthetic process	GO:2001141	8	0.02498161689318068	1.4892316874737985	25	6119	115	41918	VaccDscaff2-processed-gene-364.26,VaccDscaff28-snap-gene-344.49,VaccDscaff14-augustus-gene-155.31,VaccDscaff30-snap-gene-127.34,VaccDscaff17-snap-gene-166.24,VaccDscaff17-augustus-gene-368.23,VaccDscaff32-processed-gene-84.20,VaccDscaff47-augustus-gene-158.17,VaccDscaff24-augustus-gene-120.21,VaccDscaff7-processed-gene-67.5,VaccDscaff22-augustus-gene-298.44,VaccDscaff42-augustus-gene-124.16,VaccD…	0.14849073081306596
Biological process	obsolete regulation of nucleic acid-templated transcription	GO:1903506	0	0.02498161689318068	1.4892316874737985	25	6119	115	41918	VaccDscaff2-processed-gene-364.26,VaccDscaff28-snap-gene-344.49,VaccDscaff14-augustus-gene-155.31,VaccDscaff30-snap-gene-127.34,VaccDscaff17-snap-gene-166.24,VaccDscaff17-augustus-gene-368.23,VaccDscaff32-processed-gene-84.20,VaccDscaff47-augustus-gene-158.17,VaccDscaff24-augustus-gene-120.21,VaccDscaff7-processed-gene-67.5,VaccDscaff22-augustus-gene-298.44,VaccDscaff42-augustus-gene-124.16,VaccD…	0.14849073081306596
Biological process	organic cyclic compound biosynthetic process	GO:1901362	5	0.026863277765075466	1.3722896496608301	34	9031	115	41918	VaccDscaff2-processed-gene-364.26,VaccDscaff28-snap-gene-344.49,VaccDscaff14-augustus-gene-155.31,VaccDscaff30-snap-gene-127.34,VaccDscaff35-augustus-gene-320.55,VaccDscaff17-snap-gene-166.24,VaccDscaff1-augustus-gene-416.35,VaccDscaff17-augustus-gene-368.23,VaccDscaff32-processed-gene-84.20,VaccDscaff47-augustus-gene-158.17,VaccDscaff118-snap-gene-3.94,VaccDscaff24-augustus-gene-120.21,VaccDscaf…	0.1571607510192998
Biological process	immune system process	GO:0002376	2	0.028998400620616094	1.915694135731943	11	2093	115	41918	VaccDscaff2-processed-gene-364.26,VaccDscaff13-augustus-gene-316.17,VaccDscaff1-augustus-gene-18.52,VaccDscaff44-augustus-gene-151.19,VaccDscaff22-processed-gene-12.3,VaccDscaff10-augustus-gene-385.37,VaccDscaff42-augustus-gene-124.16,VaccDscaff5-augustus-gene-16.30,VaccDscaff6-augustus-gene-154.23,VaccDscaff1437-augustus-gene-0.6,VaccDscaff14-processed-gene-313.4,	0.1584250857435129
Biological process	reproductive process	GO:0022414	2	0.029035333928803753	1.4688279651276877	25	6204	115	41918	VaccDscaff2-processed-gene-364.26,VaccDscaff14-augustus-gene-155.31,VaccDscaff30-snap-gene-127.34,VaccDscaff6-snap-gene-255.21,VaccDscaff31-processed-gene-29.14,VaccDscaff35-augustus-gene-320.55,VaccDscaff34-processed-gene-95.3,VaccDscaff26-processed-gene-123.26,VaccDscaff32-processed-gene-84.20,VaccDscaff47-augustus-gene-158.17,VaccDscaff22-processed-gene-12.3,VaccDscaff29-augustus-gene-121.23,V…	0.15804581032308562
Biological process	heterocycle biosynthetic process	GO:0018130	5	0.03136112783240952	1.3849288862126115	31	8159	115	41918	VaccDscaff2-processed-gene-364.26,VaccDscaff28-snap-gene-344.49,VaccDscaff14-augustus-gene-155.31,VaccDscaff30-snap-gene-127.34,VaccDscaff35-augustus-gene-320.55,VaccDscaff17-snap-gene-166.24,VaccDscaff1-augustus-gene-416.35,VaccDscaff17-augustus-gene-368.23,VaccDscaff32-processed-gene-84.20,VaccDscaff47-augustus-gene-158.17,VaccDscaff118-snap-gene-3.94,VaccDscaff24-augustus-gene-120.21,VaccDscaf…	0.1646736252966804
Biological process	aromatic compound biosynthetic process	GO:0019438	5	0.031400571252741316	1.3748395957608184	32	8484	115	41918	VaccDscaff2-processed-gene-364.26,VaccDscaff28-snap-gene-344.49,VaccDscaff14-augustus-gene-155.31,VaccDscaff30-snap-gene-127.34,VaccDscaff35-augustus-gene-320.55,VaccDscaff17-snap-gene-166.24,VaccDscaff17-augustus-gene-368.23,VaccDscaff32-processed-gene-84.20,VaccDscaff47-augustus-gene-158.17,VaccDscaff118-snap-gene-3.94,VaccDscaff24-augustus-gene-120.21,VaccDscaff7-processed-gene-67.5,VaccDscaff…	0.1643001721182169
Biological process	reproduction	GO:0000003	2	0.031648293238164094	1.4570848569958703	25	6254	115	41918	VaccDscaff2-processed-gene-364.26,VaccDscaff14-augustus-gene-155.31,VaccDscaff30-snap-gene-127.34,VaccDscaff6-snap-gene-255.21,VaccDscaff31-processed-gene-29.14,VaccDscaff35-augustus-gene-320.55,VaccDscaff34-processed-gene-95.3,VaccDscaff26-processed-gene-123.26,VaccDscaff32-processed-gene-84.20,VaccDscaff47-augustus-gene-158.17,VaccDscaff22-processed-gene-12.3,VaccDscaff29-augustus-gene-121.23,V…	0.16386537892652212
Biological process	regulation of response to biotic stimulus	GO:0002831	5	0.0318158833317691	2.5371532331282154	6	862	115	41918	VaccDscaff14-augustus-gene-155.31,VaccDscaff13-augustus-gene-316.17,VaccDscaff44-augustus-gene-151.19,VaccDscaff42-augustus-gene-124.16,VaccDscaff46-snap-gene-201.32,VaccDscaff6-augustus-gene-154.23,	0.16416112024655863
Biological process	DNA-templated transcription	GO:0006351	9	0.03467043002329118	1.444611397535221	25	6308	115	41918	VaccDscaff2-processed-gene-364.26,VaccDscaff28-snap-gene-344.49,VaccDscaff14-augustus-gene-155.31,VaccDscaff30-snap-gene-127.34,VaccDscaff17-snap-gene-166.24,VaccDscaff17-augustus-gene-368.23,VaccDscaff32-processed-gene-84.20,VaccDscaff47-augustus-gene-158.17,VaccDscaff24-augustus-gene-120.21,VaccDscaff7-processed-gene-67.5,VaccDscaff22-augustus-gene-298.44,VaccDscaff42-augustus-gene-124.16,VaccD…	0.17173419671536896
Biological process	negative regulation of molecular function	GO:0044092	4	0.03609066997447452	2.7530539866018655	5	662	115	41918	VaccDscaff21-snap-gene-83.43,VaccDscaff33-processed-gene-17.23,VaccDscaff914-snap-gene-0.19,VaccDscaff6-augustus-gene-154.23,VaccDscaff40-snap-gene-16.49,	0.1735622510746574
Biological process	regulation of cellular metabolic process	GO:0031323	5	0.036679679295613665	1.3489563169519871	33	8917	115	41918	VaccDscaff2-processed-gene-364.26,VaccDscaff44-augustus-gene-94.24,VaccDscaff28-snap-gene-344.49,VaccDscaff14-augustus-gene-155.31,VaccDscaff30-snap-gene-127.34,VaccDscaff20-augustus-gene-262.18,VaccDscaff17-snap-gene-166.24,VaccDscaff17-augustus-gene-368.23,VaccDscaff32-processed-gene-84.20,VaccDscaff47-augustus-gene-158.17,VaccDscaff118-snap-gene-3.94,VaccDscaff24-augustus-gene-120.21,VaccDscaf…	0.17582581752671583
Biological process	positive regulation of DNA-templated transcription	GO:0045893	10	0.036812758280003965	2.0003287380699897	9	1640	115	41918	VaccDscaff2-processed-gene-364.26,VaccDscaff28-snap-gene-344.49,VaccDscaff14-augustus-gene-155.31,VaccDscaff30-snap-gene-127.34,VaccDscaff32-processed-gene-84.20,VaccDscaff21-snap-gene-44.52,VaccDscaff1023-snap-gene-0.8,VaccDscaff5-augustus-gene-212.22,VaccDscaff14-processed-gene-313.4,	0.17533256026950608
Biological process	response to organic substance	GO:0010033	4	0.03820568997159979	1.353462419405289	32	8618	115	41918	VaccDscaff2-processed-gene-364.26,VaccDscaff28-snap-gene-344.49,VaccDscaff14-augustus-gene-155.31,VaccDscaff27-augustus-gene-1.22,VaccDscaff1-snap-gene-225.37,VaccDscaff303-augustus-gene-0.44,VaccDscaff47-augustus-gene-134.35,VaccDscaff5-augustus-gene-295.34,VaccDscaff31-processed-gene-29.14,VaccDscaff20-augustus-gene-155.11,VaccDscaff47-augustus-gene-158.17,VaccDscaff22-processed-gene-12.3,VaccD…	0.1768649697750694
Biological process	regulation of nitrogen compound metabolic process	GO:0051171	5	0.03827926786427849	1.362550920367623	31	8293	115	41918	VaccDscaff2-processed-gene-364.26,VaccDscaff44-augustus-gene-94.24,VaccDscaff28-snap-gene-344.49,VaccDscaff14-augustus-gene-155.31,VaccDscaff30-snap-gene-127.34,VaccDscaff20-augustus-gene-262.18,VaccDscaff17-snap-gene-166.24,VaccDscaff17-augustus-gene-368.23,VaccDscaff32-processed-gene-84.20,VaccDscaff47-augustus-gene-158.17,VaccDscaff118-snap-gene-3.94,VaccDscaff24-augustus-gene-120.21,VaccDscaf…	0.1766552548022293
Biological process	regulation of shoot system development	GO:0048831	5	0.03957021570650787	2.216794469837193	7	1151	115	41918	VaccDscaff14-augustus-gene-155.31,VaccDscaff20-augustus-gene-155.11,VaccDscaff46-snap-gene-201.32,VaccDscaff20-augustus-gene-121.18,VaccDscaff7-augustus-gene-400.36,VaccDscaff11-processed-gene-356.13,VaccDscaff5-augustus-gene-212.22,	0.17982061327177584
Biological process	developmental process	GO:0032502	2	0.039789766558062434	1.2771487952528282	42	11987	115	41918	VaccDscaff2-processed-gene-364.26,VaccDscaff1277-augustus-gene-0.5,VaccDscaff14-augustus-gene-155.31,VaccDscaff30-snap-gene-127.34,VaccDscaff3-processed-gene-159.7,VaccDscaff303-augustus-gene-0.44,VaccDscaff6-snap-gene-255.21,VaccDscaff47-augustus-gene-134.35,VaccDscaff31-processed-gene-29.14,VaccDscaff35-augustus-gene-320.55,VaccDscaff34-processed-gene-95.3,VaccDscaff20-augustus-gene-155.11,Vacc…	0.18026705215024627
Biological process	RNA biosynthetic process	GO:0032774	8	0.04471804710475258	1.4095295739601197	25	6465	115	41918	VaccDscaff2-processed-gene-364.26,VaccDscaff28-snap-gene-344.49,VaccDscaff14-augustus-gene-155.31,VaccDscaff30-snap-gene-127.34,VaccDscaff17-snap-gene-166.24,VaccDscaff17-augustus-gene-368.23,VaccDscaff32-processed-gene-84.20,VaccDscaff47-augustus-gene-158.17,VaccDscaff24-augustus-gene-120.21,VaccDscaff7-processed-gene-67.5,VaccDscaff22-augustus-gene-298.44,VaccDscaff42-augustus-gene-124.16,VaccD…	0.19373474634886978
Biological process	regulation of primary metabolic process	GO:0080090	5	0.047622338340752246	1.3377098120763224	31	8447	115	41918	VaccDscaff2-processed-gene-364.26,VaccDscaff44-augustus-gene-94.24,VaccDscaff28-snap-gene-344.49,VaccDscaff14-augustus-gene-155.31,VaccDscaff30-snap-gene-127.34,VaccDscaff20-augustus-gene-262.18,VaccDscaff17-snap-gene-166.24,VaccDscaff44-augustus-gene-118.31,VaccDscaff17-augustus-gene-368.23,VaccDscaff32-processed-gene-84.20,VaccDscaff47-augustus-gene-158.17,VaccDscaff118-snap-gene-3.94,VaccDscaf…	0.2045283085964099
Biological process	sulfur compound metabolic process	GO:0006790	4	0.049643829982356724	2.273415890807195	6	962	115	41918	VaccDscaff2-processed-gene-364.26,VaccDscaff39-snap-gene-231.26,VaccDscaff22-snap-gene-18.35,VaccDscaff11-augustus-gene-205.21,VaccDscaff22-augustus-gene-298.44,VaccDscaff14-processed-gene-313.4,	0.20722115548815195
