# Supplementary material for: Supplementary Low Far-Red Light Promotes Proliferation and Photosynthetic Capacity of Blueberry In Vitro Plantlets
Source: Int J Mol Sci. 2024 Jan 5;25(2):688. doi: 10.3390/ijms25020688 (PMC10815622; doi:10.3390/ijms25020688)
Supplement: Supplementary file 1 [file ijms-25-00688-s001.zip › Supplementary Materials/Table S3 stem_blue_go_predictions.xlsx]

## Sheet: Sheet1
regulation of shoot system development GO:0048831	gene predictions	shoot system development GO:0048367	gene predictions	plant organ development GO:0099402	gene predictions	system development GO:0048731	gene predictions	anatomical structure development GO:0048856	gene predictions
VaccDscaff14-augustus-gene-155.31	ATAF1	VaccDscaff2-processed-gene-364.26	MKK9	VaccDscaff2-processed-gene-364.26	MKK9	VaccDscaff2-processed-gene-364.26	MKK9	VaccDscaff2-processed-gene-364.26	MKK9
VaccDscaff20-augustus-gene-155.11	CRE1	VaccDscaff1277-augustus-gene-0.5	FKBP42	VaccDscaff1277-augustus-gene-0.5	FKBP42	VaccDscaff1277-augustus-gene-0.5	FKBP42	VaccDscaff1277-augustus-gene-0.5	FKBP42
VaccDscaff46-snap-gene-201.32	SAG21	VaccDscaff14-augustus-gene-155.31	ATAF1	VaccDscaff14-augustus-gene-155.31	ATAF1	VaccDscaff14-augustus-gene-155.31	ATAF1	VaccDscaff14-augustus-gene-155.31	ATAF1
VaccDscaff20-augustus-gene-121.18	RAV1	VaccDscaff20-augustus-gene-155.11	CRE1	VaccDscaff34-processed-gene-95.3	GSO1	VaccDscaff30-snap-gene-127.34	RL6	VaccDscaff30-snap-gene-127.34	RL6
VaccDscaff7-augustus-gene-400.36	CYP90A1	VaccDscaff26-processed-gene-123.26	FER2	VaccDscaff20-augustus-gene-155.11	CRE1	VaccDscaff6-snap-gene-255.21	CYP78A9	VaccDscaff3-processed-gene-159.7	EXP1
VaccDscaff11-processed-gene-356.13	UGT87A2	VaccDscaff47-augustus-gene-158.17	NAC074	VaccDscaff26-processed-gene-123.26	FER2	VaccDscaff47-augustus-gene-134.35	GDI2	VaccDscaff303-augustus-gene-0.44	GASA1
VaccDscaff5-augustus-gene-212.22	AUX1	VaccDscaff29-augustus-gene-121.23	FER2	VaccDscaff17-augustus-gene-368.23	ERF74	VaccDscaff35-augustus-gene-320.55	TT13	VaccDscaff6-snap-gene-255.21	CYP78A9
		VaccDscaff46-snap-gene-201.32	SAG21	VaccDscaff47-augustus-gene-158.17	NAC074	VaccDscaff34-processed-gene-95.3	GSO1	VaccDscaff47-augustus-gene-134.35	GDI2
		VaccDscaff38-augustus-gene-76.18	COF1	VaccDscaff29-augustus-gene-121.23	FER2	VaccDscaff20-augustus-gene-155.11	CRE1	VaccDscaff31-processed-gene-29.14	GRDP1
		VaccDscaff21-snap-gene-120.36	FER2	VaccDscaff46-snap-gene-201.32	SAG21	VaccDscaff26-processed-gene-123.26	FER2	VaccDscaff35-augustus-gene-320.55	TT13
		VaccDscaff20-augustus-gene-121.18	RAV1	VaccDscaff27-augustus-gene-332.27	RAP2.2	VaccDscaff17-augustus-gene-368.23	ERF74	VaccDscaff34-processed-gene-95.3	GSO1
		VaccDscaff7-augustus-gene-400.36	CYP90A1	VaccDscaff38-augustus-gene-76.18	COF1	VaccDscaff32-processed-gene-84.20	RL1	VaccDscaff20-augustus-gene-155.11	CRE1
		VaccDscaff11-processed-gene-356.13	UGT87A2	VaccDscaff21-snap-gene-120.36	FER2	VaccDscaff47-augustus-gene-158.17	NAC074	VaccDscaff26-processed-gene-123.26	FER2
		VaccDscaff5-augustus-gene-212.22	AUX1	VaccDscaff20-augustus-gene-121.18	RAV1	VaccDscaff22-processed-gene-12.3	BAG6	VaccDscaff17-augustus-gene-368.23	ERF74
		VaccDscaff165-augustus-gene-2.35	FER1	VaccDscaff7-augustus-gene-400.36	CYP90A1	VaccDscaff29-augustus-gene-121.23	FER2	VaccDscaff32-processed-gene-84.20	RL1
		VaccDscaff33-augustus-gene-216.27	FER2	VaccDscaff5-augustus-gene-212.22	AUX1	VaccDscaff45-augustus-gene-102.32	AT5G49900.3	VaccDscaff47-augustus-gene-158.17	NAC074
		VaccDscaff33-augustus-gene-260.30	NEET	VaccDscaff165-augustus-gene-2.35	FER1	VaccDscaff46-snap-gene-201.32	SAG21	VaccDscaff22-processed-gene-12.3	BAG6
		VaccDscaff5-augustus-gene-192.33	FER1	VaccDscaff17-processed-gene-284.6	GSO1	VaccDscaff12-processed-gene-28.5	U2AF35B	VaccDscaff21-augustus-gene-152.24	HSP70-1
		VaccDscaff14-processed-gene-313.4	BUD1	VaccDscaff8-augustus-gene-159.32	ABCB4	VaccDscaff27-augustus-gene-332.27	RAP2.2	VaccDscaff29-augustus-gene-121.23	FER2
		VaccDscaff14-processed-gene-5.4	TZF3	VaccDscaff33-augustus-gene-216.27	FER2	VaccDscaff6-augustus-gene-154.23	DJC77	VaccDscaff45-augustus-gene-102.32	AT5G49900.3
				VaccDscaff33-augustus-gene-260.30	NEET	VaccDscaff38-augustus-gene-76.18	COF1	VaccDscaff46-snap-gene-201.32	SAG21
				VaccDscaff5-augustus-gene-192.33	FER1	VaccDscaff21-snap-gene-120.36	FER2	VaccDscaff12-processed-gene-28.5	U2AF35B
				VaccDscaff14-processed-gene-313.4	BUD1	VaccDscaff1437-augustus-gene-0.6	BAG6	VaccDscaff27-augustus-gene-332.27	RAP2.2
				VaccDscaff14-processed-gene-5.4	TZF3	VaccDscaff20-augustus-gene-121.18	RAV1	VaccDscaff21-snap-gene-44.52	SIGE
						VaccDscaff7-augustus-gene-400.36	CYP90A1	VaccDscaff6-augustus-gene-154.23	DJC77
						VaccDscaff11-processed-gene-356.13	UGT87A2	VaccDscaff38-augustus-gene-76.18	COF1
						VaccDscaff5-augustus-gene-212.22	AUX1	VaccDscaff21-snap-gene-120.36	FER2
						VaccDscaff165-augustus-gene-2.35	FER1	VaccDscaff1437-augustus-gene-0.6	BAG6
						VaccDscaff17-processed-gene-284.6	GSO1	VaccDscaff20-augustus-gene-121.18	RAV1
						VaccDscaff8-augustus-gene-159.32	ABCB4	VaccDscaff7-augustus-gene-400.36	CYP90A1
						VaccDscaff33-augustus-gene-216.27	FER2	VaccDscaff15-augustus-gene-216.27	PCAP1
						VaccDscaff33-augustus-gene-260.30	NEET	VaccDscaff11-processed-gene-356.13	UGT87A2
						VaccDscaff5-augustus-gene-192.33	FER1	VaccDscaff5-augustus-gene-212.22	AUX1
						VaccDscaff14-processed-gene-313.4	BUD1	VaccDscaff165-augustus-gene-2.35	FER1
						VaccDscaff14-processed-gene-5.4	TZF3	VaccDscaff17-processed-gene-284.6	GSO1
								VaccDscaff36-augustus-gene-285.26	bHLH104
								VaccDscaff8-augustus-gene-159.32	ABCB4
								VaccDscaff33-augustus-gene-216.27	FER2
								VaccDscaff33-augustus-gene-260.30	NEET
								VaccDscaff5-augustus-gene-192.33	FER1
								VaccDscaff14-processed-gene-313.4	BUD1
								VaccDscaff14-processed-gene-5.4	TZF3
