# Supplementary material for: Supplementary Low Far-Red Light Promotes Proliferation and Photosynthetic Capacity of Blueberry In Vitro Plantlets
Source: Int J Mol Sci. 2024 Jan 5;25(2):688. doi: 10.3390/ijms25020688 (PMC10815622; doi:10.3390/ijms25020688)
Supplement: Supplementary file 1 [file ijms-25-00688-s001.zip › Supplementary Materials/Table S4 stem_yellow_GO.xls]

Class	GO_Name	GO_ID	GO_Level	P_value	EnrichmentScore	HitsGenesCountsInSelectedSet	HitsGenesCountsInBackground	AllGenesCountsInSelectedSet	AllGenesCountsInBackground	GenesOfSelectedSetInGOterm	corrected p-value(BH method)
Molecular function	endopeptidase activity	GO:0004175	5	1.939287626003816E-4	5.85885823114084	7	598	72	36037	VaccDscaff28-augustus-gene-57.28,VaccDscaff23-augustus-gene-311.40,VaccDscaff28-augustus-gene-54.26,VaccDscaff35-augustus-gene-274.27,VaccDscaff36-augustus-gene-52.35,VaccDscaff4-snap-gene-377.41,VaccDscaff12-augustus-gene-100.19,	0.010520635371070702
Molecular function	null	GO:0016705	4	0.0011073146453622895	4.368575090052646	7	802	72	36037	VaccDscaff108-augustus-gene-4.25,VaccDscaff21-snap-gene-74.26,VaccDscaff47-processed-gene-140.9,VaccDscaff36-snap-gene-25.34,VaccDscaff377-augustus-gene-0.27,VaccDscaff221-processed-gene-1.7,VaccDscaff23-processed-gene-327.10,	0.026698586449290757
Molecular function	DNA-binding transcription factor activity	GO:0003700	3	0.002604283249988404	2.0687420644568713	17	4113	72	36037	VaccDscaff2-processed-gene-430.10,VaccDscaff20-snap-gene-308.40,VaccDscaff34-snap-gene-0.29,VaccDscaff25-processed-gene-294.3,VaccDscaff27-augustus-gene-332.29,VaccDscaff27-augustus-gene-332.26,VaccDscaff31-processed-gene-288.8,VaccDscaff13-snap-gene-273.47,VaccDscaff6-processed-gene-412.2,VaccDscaff34-augustus-gene-0.23,VaccDscaff34-processed-gene-288.6,VaccDscaff37-processed-gene-293.4,VaccDsca…	0.05137540593158942
Molecular function	null	GO:0016709	5	0.0044810656323051035	4.651616067740603	5	538	72	36037	VaccDscaff108-augustus-gene-4.25,VaccDscaff47-processed-gene-140.9,VaccDscaff36-snap-gene-25.34,VaccDscaff377-augustus-gene-0.27,VaccDscaff23-processed-gene-327.10,	0.07479932632386212
Molecular function	transcription regulator activity	GO:0140110	2	0.005606804251705677	1.9207079257587156	17	4430	72	36037	VaccDscaff2-processed-gene-430.10,VaccDscaff20-snap-gene-308.40,VaccDscaff34-snap-gene-0.29,VaccDscaff25-processed-gene-294.3,VaccDscaff27-augustus-gene-332.29,VaccDscaff27-augustus-gene-332.26,VaccDscaff31-processed-gene-288.8,VaccDscaff13-snap-gene-273.47,VaccDscaff6-processed-gene-412.2,VaccDscaff34-augustus-gene-0.23,VaccDscaff34-processed-gene-288.6,VaccDscaff37-processed-gene-293.4,VaccDsca…	0.086905465901438
Molecular function	peptidase activity	GO:0008233	4	0.005669875911098243	3.2561312474184225	7	1076	72	36037	VaccDscaff28-augustus-gene-57.28,VaccDscaff23-augustus-gene-311.40,VaccDscaff28-augustus-gene-54.26,VaccDscaff35-augustus-gene-274.27,VaccDscaff36-augustus-gene-52.35,VaccDscaff4-snap-gene-377.41,VaccDscaff12-augustus-gene-100.19,	0.08202420484722125
Molecular function	monooxygenase activity	GO:0004497	4	0.006427120395476216	3.605142056822729	6	833	72	36037	VaccDscaff108-augustus-gene-4.25,VaccDscaff47-processed-gene-140.9,VaccDscaff36-snap-gene-25.34,VaccDscaff377-augustus-gene-0.27,VaccDscaff221-processed-gene-1.7,VaccDscaff23-processed-gene-327.10,	0.08716782036364618
Molecular function	sequence-specific DNA binding	GO:0043565	6	0.009626032989460964	2.22900922177238	11	2470	72	36037	VaccDscaff2-processed-gene-430.10,VaccDscaff20-snap-gene-308.40,VaccDscaff34-snap-gene-0.29,VaccDscaff25-processed-gene-294.3,VaccDscaff27-augustus-gene-332.29,VaccDscaff27-augustus-gene-332.26,VaccDscaff31-processed-gene-288.8,VaccDscaff34-augustus-gene-0.23,VaccDscaff17-augustus-gene-368.24,VaccDscaff28-processed-gene-233.7,VaccDscaff28-processed-gene-226.7,	0.1099394294059489
Molecular function	obsolete cofactor binding	GO:0048037	0	0.015373156989644143	3.432879896357263	5	729	72	36037	VaccDscaff1666-snap-gene-0.5,VaccDscaff38-augustus-gene-85.18,VaccDscaff10-snap-gene-362.41,VaccDscaff22-augustus-gene-237.33,VaccDscaff1-snap-gene-43.39,	0.14504239420664258
Molecular function	oxidoreductase activity	GO:0016491	3	0.022148030210568992	1.9000843614889802	12	3161	72	36037	VaccDscaff108-augustus-gene-4.25,VaccDscaff22-snap-gene-240.29,VaccDscaff21-snap-gene-74.26,VaccDscaff38-augustus-gene-85.18,VaccDscaff46-augustus-gene-104.22,VaccDscaff47-processed-gene-140.9,VaccDscaff36-snap-gene-25.34,VaccDscaff377-augustus-gene-0.27,VaccDscaff221-processed-gene-1.7,VaccDscaff5-augustus-gene-117.19,VaccDscaff23-processed-gene-327.10,VaccDscaff34-snap-gene-253.35,	0.1780045390997582
Cellular component	cell wall	GO:0005618	4	6.828031835979242E-4	3.1513843916360242	11	1918	76	41761	VaccDscaff34-processed-gene-9.9,VaccDscaff26-augustus-gene-19.23,VaccDscaff3-augustus-gene-177.37,VaccDscaff11-snap-gene-376.37,VaccDscaff29-processed-gene-153.14,VaccDscaff1666-snap-gene-0.5,VaccDscaff35-augustus-gene-274.27,VaccDscaff36-augustus-gene-52.35,VaccDscaff65-processed-gene-8.0,VaccDscaff4-snap-gene-377.41,VaccDscaff25-snap-gene-238.26,	0.04813762444365366
Cellular component	external encapsulating structure	GO:0030312	3	7.691856666639518E-4	3.1060407313247147	11	1946	76	41761	VaccDscaff34-processed-gene-9.9,VaccDscaff26-augustus-gene-19.23,VaccDscaff3-augustus-gene-177.37,VaccDscaff11-snap-gene-376.37,VaccDscaff29-processed-gene-153.14,VaccDscaff1666-snap-gene-0.5,VaccDscaff35-augustus-gene-274.27,VaccDscaff36-augustus-gene-52.35,VaccDscaff65-processed-gene-8.0,VaccDscaff4-snap-gene-377.41,VaccDscaff25-snap-gene-238.26,	0.036151726333205736
Cellular component	endoplasmic reticulum	GO:0005783	6	0.0010148890742607275	2.5447620871563625	14	3023	76	41761	VaccDscaff22-snap-gene-240.29,VaccDscaff16-augustus-gene-45.47,VaccDscaff41-augustus-gene-230.43,VaccDscaff28-augustus-gene-6.26,VaccDscaff14-augustus-gene-370.56,VaccDscaff46-augustus-gene-104.22,VaccDscaff23-augustus-gene-116.28,VaccDscaff18-augustus-gene-353.32,VaccDscaff35-augustus-gene-274.27,VaccDscaff12-processed-gene-301.1,VaccDscaff36-augustus-gene-52.35,VaccDscaff22-processed-gene-49.1,…	0.035774839867690644
Cellular component	extracellular region	GO:0005576	3	0.0019314494586748499	3.205043149026162	9	1543	76	41761	VaccDscaff34-processed-gene-9.9,VaccDscaff29-processed-gene-153.14,VaccDscaff28-augustus-gene-57.28,VaccDscaff28-augustus-gene-54.26,VaccDscaff35-augustus-gene-274.27,VaccDscaff36-augustus-gene-52.35,VaccDscaff10-augustus-gene-347.26,VaccDscaff4-snap-gene-377.41,VaccDscaff22-snap-gene-204.39,	0.054466874734630764
Cellular component	plant-type cell wall	GO:0009505	5	0.0064885606515188154	3.603192407247627	6	915	76	41761	VaccDscaff34-processed-gene-9.9,VaccDscaff1666-snap-gene-0.5,VaccDscaff35-augustus-gene-274.27,VaccDscaff36-augustus-gene-52.35,VaccDscaff65-processed-gene-8.0,VaccDscaff4-snap-gene-377.41,	0.13069815026630757
Cellular component	apoplast	GO:0048046	4	0.034230265871578736	2.780803856808012	5	988	76	41761	VaccDscaff34-processed-gene-9.9,VaccDscaff29-processed-gene-153.14,VaccDscaff28-augustus-gene-57.28,VaccDscaff28-augustus-gene-54.26,VaccDscaff22-snap-gene-204.39,	0.40220562399105014
Cellular component	endomembrane system	GO:0012505	3	0.042117380398313475	1.519551875540749	18	6509	76	41761	VaccDscaff22-snap-gene-240.29,VaccDscaff19-augustus-gene-173.45,VaccDscaff29-processed-gene-153.14,VaccDscaff16-augustus-gene-45.47,VaccDscaff41-augustus-gene-230.43,VaccDscaff28-augustus-gene-6.26,VaccDscaff14-augustus-gene-370.56,VaccDscaff46-augustus-gene-104.22,VaccDscaff23-augustus-gene-116.28,VaccDscaff10-snap-gene-362.41,VaccDscaff18-augustus-gene-353.32,VaccDscaff35-augustus-gene-274.27,V…	0.45681158739709227
Biological process	detection of hypoxia	GO:0070483	7	3.8688607872927605E-11	191.9322344322344	5	14	78	41918	VaccDscaff34-snap-gene-0.29,VaccDscaff27-augustus-gene-332.29,VaccDscaff27-augustus-gene-332.26,VaccDscaff34-augustus-gene-0.23,VaccDscaff17-augustus-gene-368.24,	3.4162040751795075E-8
Biological process	detection of oxygen	GO:0003032	5	3.8688607872927605E-11	191.9322344322344	5	14	78	41918	VaccDscaff34-snap-gene-0.29,VaccDscaff27-augustus-gene-332.29,VaccDscaff27-augustus-gene-332.26,VaccDscaff34-augustus-gene-0.23,VaccDscaff17-augustus-gene-368.24,	3.4162040751795075E-8
Biological process	defense response to fungus	GO:0050832	7	3.833888375426309E-5	4.867846525455221	10	1104	78	41918	VaccDscaff20-snap-gene-308.40,VaccDscaff29-processed-gene-153.14,VaccDscaff14-augustus-gene-370.56,VaccDscaff34-processed-gene-288.6,VaccDscaff35-augustus-gene-274.27,VaccDscaff36-augustus-gene-52.35,VaccDscaff4-snap-gene-377.41,VaccDscaff39-augustus-gene-105.22,VaccDscaff43-augustus-gene-8.43,VaccDscaff46-processed-gene-1.10,	0.011284411451671436
Biological process	regulation of root development	GO:2000280	5	5.3540370928639724E-5	9.10864841373316	6	354	78	41918	VaccDscaff34-snap-gene-0.29,VaccDscaff27-augustus-gene-332.29,VaccDscaff27-augustus-gene-332.26,VaccDscaff14-augustus-gene-370.56,VaccDscaff34-augustus-gene-0.23,VaccDscaff17-augustus-gene-368.24,	0.01181903688249722
Biological process	detection of chemical stimulus	GO:0009593	4	6.271128958357242E-5	12.049557318615614	5	223	78	41918	VaccDscaff34-snap-gene-0.29,VaccDscaff27-augustus-gene-332.29,VaccDscaff27-augustus-gene-332.26,VaccDscaff34-augustus-gene-0.23,VaccDscaff17-augustus-gene-368.24,	0.011074813740458888
Biological process	detection of stimulus	GO:0051606	3	7.036368339063959E-5	8.66790736145575	6	372	78	41918	VaccDscaff34-snap-gene-0.29,VaccDscaff19-augustus-gene-173.45,VaccDscaff27-augustus-gene-332.29,VaccDscaff27-augustus-gene-332.26,VaccDscaff34-augustus-gene-0.23,VaccDscaff17-augustus-gene-368.24,	0.010355188738989126
Biological process	secondary metabolite biosynthetic process	GO:0044550	4	1.009669788545331E-4	4.836692307692308	9	1000	78	41918	VaccDscaff108-augustus-gene-4.25,VaccDscaff22-snap-gene-240.29,VaccDscaff46-augustus-gene-104.22,VaccDscaff47-processed-gene-140.9,VaccDscaff36-snap-gene-25.34,VaccDscaff12-processed-gene-301.1,VaccDscaff22-processed-gene-49.1,VaccDscaff221-processed-gene-1.7,VaccDscaff23-processed-gene-327.10,	0.01114423029106909
Biological process	response to extracellular stimulus	GO:0009991	4	1.6764273940639285E-4	4.520273184759167	9	1070	78	41918	VaccDscaff26-augustus-gene-19.23,VaccDscaff16-augustus-gene-45.47,VaccDscaff41-augustus-gene-230.43,VaccDscaff14-augustus-gene-370.56,VaccDscaff23-augustus-gene-116.28,VaccDscaff18-augustus-gene-353.32,VaccDscaff11-augustus-gene-222.34,VaccDscaff7-augustus-gene-379.12,VaccDscaff43-augustus-gene-8.43,	0.016447615432871654
Biological process	regulation of multicellular organismal development	GO:2000026	5	1.962796341431483E-4	3.0034904549874613	14	2505	78	41918	VaccDscaff34-snap-gene-0.29,VaccDscaff25-processed-gene-294.3,VaccDscaff27-augustus-gene-332.29,VaccDscaff27-augustus-gene-332.26,VaccDscaff29-processed-gene-153.14,VaccDscaff14-augustus-gene-370.56,VaccDscaff34-augustus-gene-0.23,VaccDscaff34-processed-gene-288.6,VaccDscaff17-augustus-gene-368.24,VaccDscaff3-snap-gene-159.14,VaccDscaff28-processed-gene-233.7,VaccDscaff1250-snap-gene-0.5,VaccDsca…	0.014442909745699997
Biological process	response to chemical	GO:0042221	3	2.31011510988699E-4	1.6841009136257716	37	11807	78	41918	VaccDscaff34-processed-gene-9.9,VaccDscaff2-processed-gene-430.10,VaccDscaff21-snap-gene-74.26,VaccDscaff20-snap-gene-308.40,VaccDscaff34-snap-gene-0.29,VaccDscaff19-augustus-gene-173.45,VaccDscaff25-processed-gene-294.3,VaccDscaff27-augustus-gene-332.29,VaccDscaff27-augustus-gene-332.26,VaccDscaff29-processed-gene-153.14,VaccDscaff16-augustus-gene-45.47,VaccDscaff43-snap-gene-219.34,VaccDscaff39…	0.014570226014501515
Biological process	response to hypoxia	GO:0001666	6	3.3152834620453486E-4	8.423358250944457	5	319	78	41918	VaccDscaff34-snap-gene-0.29,VaccDscaff27-augustus-gene-332.29,VaccDscaff27-augustus-gene-332.26,VaccDscaff34-augustus-gene-0.23,VaccDscaff17-augustus-gene-368.24,	0.01951596864657362
Biological process	response to fungus	GO:0009620	6	3.3446410612092414E-4	3.732015669515669	10	1440	78	41918	VaccDscaff20-snap-gene-308.40,VaccDscaff29-processed-gene-153.14,VaccDscaff14-augustus-gene-370.56,VaccDscaff34-processed-gene-288.6,VaccDscaff35-augustus-gene-274.27,VaccDscaff36-augustus-gene-52.35,VaccDscaff4-snap-gene-377.41,VaccDscaff39-augustus-gene-105.22,VaccDscaff43-augustus-gene-8.43,VaccDscaff46-processed-gene-1.10,	0.0184582378565485
Biological process	response to external stimulus	GO:0009605	3	3.91793931049933E-4	2.070771636360512	23	5969	78	41918	VaccDscaff29-augustus-gene-52.36,VaccDscaff26-augustus-gene-19.23,VaccDscaff20-snap-gene-308.40,VaccDscaff19-augustus-gene-173.45,VaccDscaff29-processed-gene-153.14,VaccDscaff16-augustus-gene-45.47,VaccDscaff13-snap-gene-273.47,VaccDscaff41-augustus-gene-230.43,VaccDscaff14-augustus-gene-370.56,VaccDscaff28-augustus-gene-57.28,VaccDscaff28-augustus-gene-54.26,VaccDscaff23-augustus-gene-116.28,Vac…	0.020350237712770048
Biological process	negative regulation of developmental process	GO:0051093	5	4.104315676034531E-4	5.188788682581786	7	725	78	41918	VaccDscaff25-processed-gene-294.3,VaccDscaff29-processed-gene-153.14,VaccDscaff34-processed-gene-288.6,VaccDscaff3-snap-gene-159.14,VaccDscaff11-augustus-gene-222.34,VaccDscaff28-processed-gene-233.7,VaccDscaff28-processed-gene-226.7,	0.02013394856632495
Biological process	defense response to other organism	GO:0098542	6	4.3342339099272653E-4	2.540946838819179	16	3384	78	41918	VaccDscaff29-augustus-gene-52.36,VaccDscaff20-snap-gene-308.40,VaccDscaff19-augustus-gene-173.45,VaccDscaff29-processed-gene-153.14,VaccDscaff14-augustus-gene-370.56,VaccDscaff28-augustus-gene-57.28,VaccDscaff28-augustus-gene-54.26,VaccDscaff34-processed-gene-288.6,VaccDscaff35-augustus-gene-274.27,VaccDscaff36-augustus-gene-52.35,VaccDscaff4-snap-gene-377.41,VaccDscaff11-augustus-gene-222.34,Vac…	0.020142781802451448
Biological process	plant organ development	GO:0099402	4	5.448002497165927E-4	2.397264329303164	17	3811	78	41918	VaccDscaff21-snap-gene-74.26,VaccDscaff34-snap-gene-0.29,VaccDscaff25-processed-gene-294.3,VaccDscaff27-augustus-gene-332.29,VaccDscaff27-augustus-gene-332.26,VaccDscaff14-augustus-gene-370.56,VaccDscaff1-snap-gene-33.40,VaccDscaff34-augustus-gene-0.23,VaccDscaff34-processed-gene-288.6,VaccDscaff35-augustus-gene-274.27,VaccDscaff17-augustus-gene-368.24,VaccDscaff635-augustus-gene-0.6,VaccDscaff36…	0.024052931024987567
Biological process	response to decreased oxygen levels	GO:0036293	5	5.528277083302058E-4	7.526754291460173	5	357	78	41918	VaccDscaff34-snap-gene-0.29,VaccDscaff27-augustus-gene-332.29,VaccDscaff27-augustus-gene-332.26,VaccDscaff34-augustus-gene-0.23,VaccDscaff17-augustus-gene-368.24,	0.023245088878836747
Biological process	response to oxygen levels	GO:0070482	4	5.959804262449797E-4	7.402345129617856	5	363	78	41918	VaccDscaff34-snap-gene-0.29,VaccDscaff27-augustus-gene-332.29,VaccDscaff27-augustus-gene-332.26,VaccDscaff34-augustus-gene-0.23,VaccDscaff17-augustus-gene-368.24,	0.021927113182263213
Biological process	system development	GO:0048731	4	8.554824889612789E-4	1.8830072053617957	25	7135	78	41918	VaccDscaff108-augustus-gene-4.25,VaccDscaff21-snap-gene-74.26,VaccDscaff34-snap-gene-0.29,VaccDscaff25-processed-gene-294.3,VaccDscaff27-augustus-gene-332.29,VaccDscaff27-augustus-gene-332.26,VaccDscaff16-augustus-gene-45.47,VaccDscaff13-snap-gene-273.47,VaccDscaff43-snap-gene-219.34,VaccDscaff14-augustus-gene-370.56,VaccDscaff1-snap-gene-33.40,VaccDscaff34-augustus-gene-0.23,VaccDscaff34-process…	0.03021564151011237
Biological process	regulation of developmental process	GO:0050793	4	9.882221358449295E-4	2.447966549090145	15	3293	78	41918	VaccDscaff34-snap-gene-0.29,VaccDscaff25-processed-gene-294.3,VaccDscaff27-augustus-gene-332.29,VaccDscaff27-augustus-gene-332.26,VaccDscaff29-processed-gene-153.14,VaccDscaff14-augustus-gene-370.56,VaccDscaff34-augustus-gene-0.23,VaccDscaff34-processed-gene-288.6,VaccDscaff17-augustus-gene-368.24,VaccDscaff3-snap-gene-159.14,VaccDscaff11-augustus-gene-222.34,VaccDscaff28-processed-gene-233.7,Vac…	0.0323185239241138
Biological process	secondary metabolic process	GO:0019748	3	0.0010832445667483537	3.48967698967699	9	1386	78	41918	VaccDscaff108-augustus-gene-4.25,VaccDscaff22-snap-gene-240.29,VaccDscaff46-augustus-gene-104.22,VaccDscaff47-processed-gene-140.9,VaccDscaff36-snap-gene-25.34,VaccDscaff12-processed-gene-301.1,VaccDscaff22-processed-gene-49.1,VaccDscaff221-processed-gene-1.7,VaccDscaff23-processed-gene-327.10,	0.03416089115852844
Biological process	response to stimulus	GO:0050896	2	0.0011112732286840954	1.3756235232344447	51	19924	78	41918	VaccDscaff29-augustus-gene-52.36,VaccDscaff34-processed-gene-9.9,VaccDscaff2-processed-gene-430.10,VaccDscaff21-snap-gene-74.26,VaccDscaff26-augustus-gene-19.23,VaccDscaff20-snap-gene-308.40,VaccDscaff34-snap-gene-0.29,VaccDscaff19-augustus-gene-173.45,VaccDscaff25-processed-gene-294.3,VaccDscaff27-augustus-gene-332.29,VaccDscaff27-augustus-gene-332.26,VaccDscaff29-processed-gene-153.14,VaccDscaf…	0.033836353825105386
Biological process	regulation of multicellular organismal process	GO:0051239	4	0.0011839733646707984	2.50791452991453	14	3000	78	41918	VaccDscaff34-snap-gene-0.29,VaccDscaff25-processed-gene-294.3,VaccDscaff27-augustus-gene-332.29,VaccDscaff27-augustus-gene-332.26,VaccDscaff29-processed-gene-153.14,VaccDscaff14-augustus-gene-370.56,VaccDscaff34-augustus-gene-0.23,VaccDscaff34-processed-gene-288.6,VaccDscaff17-augustus-gene-368.24,VaccDscaff3-snap-gene-159.14,VaccDscaff28-processed-gene-233.7,VaccDscaff1250-snap-gene-0.5,VaccDsca…	0.03484828270014383
Biological process	phyllome development	GO:0048827	5	0.0013090072615139503	2.9120752810407984	11	2030	78	41918	VaccDscaff21-snap-gene-74.26,VaccDscaff25-processed-gene-294.3,VaccDscaff1-snap-gene-33.40,VaccDscaff34-processed-gene-288.6,VaccDscaff35-augustus-gene-274.27,VaccDscaff635-augustus-gene-0.6,VaccDscaff36-augustus-gene-52.35,VaccDscaff4-snap-gene-377.41,VaccDscaff28-processed-gene-233.7,VaccDscaff43-augustus-gene-8.43,VaccDscaff28-processed-gene-226.7,	0.03612041912240056
Biological process	negative regulation of post-embryonic development	GO:0048581	7	0.0015329239107273462	5.984524013477242	5	449	78	41918	VaccDscaff25-processed-gene-294.3,VaccDscaff29-processed-gene-153.14,VaccDscaff3-snap-gene-159.14,VaccDscaff28-processed-gene-233.7,VaccDscaff28-processed-gene-226.7,	0.04101732767188626
Biological process	negative regulation of multicellular organismal process	GO:0051241	5	0.001728912696606022	4.727949469884954	6	682	78	41918	VaccDscaff25-processed-gene-294.3,VaccDscaff29-processed-gene-153.14,VaccDscaff34-processed-gene-288.6,VaccDscaff3-snap-gene-159.14,VaccDscaff28-processed-gene-233.7,VaccDscaff28-processed-gene-226.7,	0.04361799746008907
Biological process	response to nutrient levels	GO:0031667	5	0.0019549331208625897	3.9640377185161166	7	949	78	41918	VaccDscaff26-augustus-gene-19.23,VaccDscaff16-augustus-gene-45.47,VaccDscaff41-augustus-gene-230.43,VaccDscaff23-augustus-gene-116.28,VaccDscaff18-augustus-gene-353.32,VaccDscaff11-augustus-gene-222.34,VaccDscaff7-augustus-gene-379.12,	0.04665421474923424
Biological process	response to stress	GO:0006950	3	0.002146066517167089	1.5797736024887281	33	11226	78	41918	VaccDscaff29-augustus-gene-52.36,VaccDscaff34-processed-gene-9.9,VaccDscaff2-processed-gene-430.10,VaccDscaff26-augustus-gene-19.23,VaccDscaff20-snap-gene-308.40,VaccDscaff34-snap-gene-0.29,VaccDscaff19-augustus-gene-173.45,VaccDscaff27-augustus-gene-332.29,VaccDscaff27-augustus-gene-332.26,VaccDscaff29-processed-gene-153.14,VaccDscaff16-augustus-gene-45.47,VaccDscaff41-augustus-gene-230.43,VaccD…	0.04986780880680367
Biological process	defense response	GO:0006952	4	0.0022724138300419527	2.1740996466660185	16	3955	78	41918	VaccDscaff29-augustus-gene-52.36,VaccDscaff20-snap-gene-308.40,VaccDscaff19-augustus-gene-173.45,VaccDscaff29-processed-gene-153.14,VaccDscaff14-augustus-gene-370.56,VaccDscaff28-augustus-gene-57.28,VaccDscaff28-augustus-gene-54.26,VaccDscaff34-processed-gene-288.6,VaccDscaff35-augustus-gene-274.27,VaccDscaff36-augustus-gene-52.35,VaccDscaff4-snap-gene-377.41,VaccDscaff11-augustus-gene-222.34,Vac…	0.05016353529817611
Biological process	phenylpropanoid biosynthetic process	GO:0009699	6	0.0023827911382483524	5.406541814992519	5	497	78	41918	VaccDscaff22-snap-gene-240.29,VaccDscaff46-augustus-gene-104.22,VaccDscaff12-processed-gene-301.1,VaccDscaff22-processed-gene-49.1,VaccDscaff221-processed-gene-1.7,	0.051317184757885256
Biological process	defense response to bacterium	GO:0042742	7	0.0024097040492797595	3.104423817517527	9	1558	78	41918	VaccDscaff29-augustus-gene-52.36,VaccDscaff20-snap-gene-308.40,VaccDscaff19-augustus-gene-173.45,VaccDscaff29-processed-gene-153.14,VaccDscaff34-processed-gene-288.6,VaccDscaff11-augustus-gene-222.34,VaccDscaff16-augustus-gene-117.33,VaccDscaff39-augustus-gene-105.22,VaccDscaff43-augustus-gene-8.43,	0.05066115894081018
Biological process	response to cold	GO:0009409	5	0.0025802059193434923	3.0728667774411105	9	1574	78	41918	VaccDscaff34-processed-gene-9.9,VaccDscaff29-processed-gene-153.14,VaccDscaff16-augustus-gene-45.47,VaccDscaff41-augustus-gene-230.43,VaccDscaff18-augustus-gene-353.32,VaccDscaff11-augustus-gene-222.34,VaccDscaff7-augustus-gene-379.12,VaccDscaff43-augustus-gene-8.43,VaccDscaff5-augustus-gene-117.19,	0.05298422852977451
Biological process	innate immune response	GO:0045087	7	0.0033878930238961935	2.949202626641651	9	1640	78	41918	VaccDscaff29-augustus-gene-52.36,VaccDscaff14-augustus-gene-370.56,VaccDscaff28-augustus-gene-57.28,VaccDscaff28-augustus-gene-54.26,VaccDscaff34-processed-gene-288.6,VaccDscaff35-augustus-gene-274.27,VaccDscaff36-augustus-gene-52.35,VaccDscaff4-snap-gene-377.41,VaccDscaff16-augustus-gene-117.33,	0.05983019080200678
Biological process	response to brassinosteroid	GO:0009741	6	0.0035608344583031304	4.921339344416267	5	546	78	41918	VaccDscaff25-processed-gene-294.3,VaccDscaff6-processed-gene-412.2,VaccDscaff37-processed-gene-293.4,VaccDscaff28-processed-gene-233.7,VaccDscaff28-processed-gene-226.7,	0.06165131032709145
Biological process	reproductive system development	GO:0061458	5	0.0037006665925302107	2.0105577374503434	17	4544	78	41918	VaccDscaff108-augustus-gene-4.25,VaccDscaff21-snap-gene-74.26,VaccDscaff25-processed-gene-294.3,VaccDscaff16-augustus-gene-45.47,VaccDscaff13-snap-gene-273.47,VaccDscaff43-snap-gene-219.34,VaccDscaff14-augustus-gene-370.56,VaccDscaff1-snap-gene-33.40,VaccDscaff18-augustus-gene-353.32,VaccDscaff35-augustus-gene-274.27,VaccDscaff36-augustus-gene-52.35,VaccDscaff4-snap-gene-377.41,VaccDscaff28-proce…	0.06284016540777261
Biological process	reproductive structure development	GO:0048608	4	0.0037006665925302107	2.0105577374503434	17	4544	78	41918	VaccDscaff108-augustus-gene-4.25,VaccDscaff21-snap-gene-74.26,VaccDscaff25-processed-gene-294.3,VaccDscaff16-augustus-gene-45.47,VaccDscaff13-snap-gene-273.47,VaccDscaff43-snap-gene-219.34,VaccDscaff14-augustus-gene-370.56,VaccDscaff1-snap-gene-33.40,VaccDscaff18-augustus-gene-353.32,VaccDscaff35-augustus-gene-274.27,VaccDscaff36-augustus-gene-52.35,VaccDscaff4-snap-gene-377.41,VaccDscaff28-proce…	0.06284016540777261
Biological process	root development	GO:0048364	5	0.003977993745305275	2.6803504060361916	10	2005	78	41918	VaccDscaff34-snap-gene-0.29,VaccDscaff25-processed-gene-294.3,VaccDscaff27-augustus-gene-332.29,VaccDscaff27-augustus-gene-332.26,VaccDscaff14-augustus-gene-370.56,VaccDscaff34-augustus-gene-0.23,VaccDscaff17-augustus-gene-368.24,VaccDscaff28-processed-gene-233.7,VaccDscaff43-augustus-gene-8.43,VaccDscaff28-processed-gene-226.7,	0.06504756439082514
Biological process	root system development	GO:0022622	5	0.00403410040869967	2.6750137203098876	10	2009	78	41918	VaccDscaff34-snap-gene-0.29,VaccDscaff25-processed-gene-294.3,VaccDscaff27-augustus-gene-332.29,VaccDscaff27-augustus-gene-332.26,VaccDscaff14-augustus-gene-370.56,VaccDscaff34-augustus-gene-0.23,VaccDscaff17-augustus-gene-368.24,VaccDscaff28-processed-gene-233.7,VaccDscaff43-augustus-gene-8.43,VaccDscaff28-processed-gene-226.7,	0.06476564837966925
Biological process	phenylpropanoid metabolic process	GO:0009698	5	0.004332762839854287	4.697642101488255	5	572	78	41918	VaccDscaff22-snap-gene-240.29,VaccDscaff46-augustus-gene-104.22,VaccDscaff12-processed-gene-301.1,VaccDscaff22-processed-gene-49.1,VaccDscaff221-processed-gene-1.7,	0.06831838549270243
Biological process	vegetative to reproductive phase transition of meristem	GO:0010228	4	0.0045595226165986436	4.640848500952127	5	579	78	41918	VaccDscaff21-snap-gene-74.26,VaccDscaff25-processed-gene-294.3,VaccDscaff28-processed-gene-233.7,VaccDscaff28-processed-gene-226.7,VaccDscaff34-snap-gene-253.35,	0.07063260474485268
Biological process	multicellular organism development	GO:0007275	4	0.005656270792574469	1.5804523873004075	28	9521	78	41918	VaccDscaff108-augustus-gene-4.25,VaccDscaff21-snap-gene-74.26,VaccDscaff34-snap-gene-0.29,VaccDscaff25-processed-gene-294.3,VaccDscaff27-augustus-gene-332.29,VaccDscaff27-augustus-gene-332.26,VaccDscaff29-processed-gene-153.14,VaccDscaff16-augustus-gene-45.47,VaccDscaff13-snap-gene-273.47,VaccDscaff43-snap-gene-219.34,VaccDscaff14-augustus-gene-370.56,VaccDscaff1-snap-gene-33.40,VaccDscaff34-augu…	0.08611184672143546
Biological process	immune response	GO:0006955	3	0.006096518544985496	2.6930358060647595	9	1796	78	41918	VaccDscaff29-augustus-gene-52.36,VaccDscaff14-augustus-gene-370.56,VaccDscaff28-augustus-gene-57.28,VaccDscaff28-augustus-gene-54.26,VaccDscaff34-processed-gene-288.6,VaccDscaff35-augustus-gene-274.27,VaccDscaff36-augustus-gene-52.35,VaccDscaff4-snap-gene-377.41,VaccDscaff16-augustus-gene-117.33,	0.0912411165291897
Biological process	response to metal ion	GO:0010038	5	0.006359370119751961	2.6751616746085776	9	1808	78	41918	VaccDscaff29-processed-gene-153.14,VaccDscaff4-augustus-gene-359.28,VaccDscaff47-processed-gene-140.9,VaccDscaff36-snap-gene-25.34,VaccDscaff635-augustus-gene-0.6,VaccDscaff30-augustus-gene-337.33,VaccDscaff11-augustus-gene-222.34,VaccDscaff22-snap-gene-204.39,VaccDscaff34-snap-gene-253.35,	0.0935887302623497
Biological process	response to abiotic stimulus	GO:0009628	3	0.006445241313036809	1.6823786439956305	23	7347	78	41918	VaccDscaff34-processed-gene-9.9,VaccDscaff21-snap-gene-74.26,VaccDscaff34-snap-gene-0.29,VaccDscaff25-processed-gene-294.3,VaccDscaff27-augustus-gene-332.29,VaccDscaff27-augustus-gene-332.26,VaccDscaff29-processed-gene-153.14,VaccDscaff16-augustus-gene-45.47,VaccDscaff13-snap-gene-273.47,VaccDscaff41-augustus-gene-230.43,VaccDscaff6-augustus-gene-247.26,VaccDscaff34-augustus-gene-0.23,VaccDscaff1…	0.09179271095825003
Biological process	response to other organism	GO:0051707	5	0.00663601085050014	1.949345749844503	16	4411	78	41918	VaccDscaff29-augustus-gene-52.36,VaccDscaff20-snap-gene-308.40,VaccDscaff19-augustus-gene-173.45,VaccDscaff29-processed-gene-153.14,VaccDscaff14-augustus-gene-370.56,VaccDscaff28-augustus-gene-57.28,VaccDscaff28-augustus-gene-54.26,VaccDscaff34-processed-gene-288.6,VaccDscaff35-augustus-gene-274.27,VaccDscaff36-augustus-gene-52.35,VaccDscaff4-snap-gene-377.41,VaccDscaff11-augustus-gene-222.34,Vac…	0.09300948541256546
Biological process	response to external biotic stimulus	GO:0043207	4	0.006837671408237211	1.943178328263074	16	4425	78	41918	VaccDscaff29-augustus-gene-52.36,VaccDscaff20-snap-gene-308.40,VaccDscaff19-augustus-gene-173.45,VaccDscaff29-processed-gene-153.14,VaccDscaff14-augustus-gene-370.56,VaccDscaff28-augustus-gene-57.28,VaccDscaff28-augustus-gene-54.26,VaccDscaff34-processed-gene-288.6,VaccDscaff35-augustus-gene-274.27,VaccDscaff36-augustus-gene-52.35,VaccDscaff4-snap-gene-377.41,VaccDscaff11-augustus-gene-222.34,Vac…	0.09433849771052277
Biological process	response to biotic stimulus	GO:0009607	3	0.007332855566753671	1.9287941010686636	16	4458	78	41918	VaccDscaff29-augustus-gene-52.36,VaccDscaff20-snap-gene-308.40,VaccDscaff19-augustus-gene-173.45,VaccDscaff29-processed-gene-153.14,VaccDscaff14-augustus-gene-370.56,VaccDscaff28-augustus-gene-57.28,VaccDscaff28-augustus-gene-54.26,VaccDscaff34-processed-gene-288.6,VaccDscaff35-augustus-gene-274.27,VaccDscaff36-augustus-gene-52.35,VaccDscaff4-snap-gene-377.41,VaccDscaff11-augustus-gene-222.34,Vac…	0.09810471917338623
Biological process	flower development	GO:0009908	7	0.007807854732741926	2.5892357107560535	9	1868	78	41918	VaccDscaff21-snap-gene-74.26,VaccDscaff25-processed-gene-294.3,VaccDscaff1-snap-gene-33.40,VaccDscaff35-augustus-gene-274.27,VaccDscaff36-augustus-gene-52.35,VaccDscaff4-snap-gene-377.41,VaccDscaff28-processed-gene-233.7,VaccDscaff1250-snap-gene-0.5,VaccDscaff28-processed-gene-226.7,	0.09444295519193316
Biological process	post-embryonic development	GO:0009791	3	0.008298936692388015	1.7366626479568796	20	6189	78	41918	VaccDscaff108-augustus-gene-4.25,VaccDscaff21-snap-gene-74.26,VaccDscaff25-processed-gene-294.3,VaccDscaff29-processed-gene-153.14,VaccDscaff16-augustus-gene-45.47,VaccDscaff13-snap-gene-273.47,VaccDscaff43-snap-gene-219.34,VaccDscaff14-augustus-gene-370.56,VaccDscaff1-snap-gene-33.40,VaccDscaff18-augustus-gene-353.32,VaccDscaff35-augustus-gene-274.27,VaccDscaff3-snap-gene-159.14,VaccDscaff36-aug…	0.09902650134295429
Biological process	reproductive shoot system development	GO:0090567	6	0.008677453803346169	2.5456275303643725	9	1900	78	41918	VaccDscaff21-snap-gene-74.26,VaccDscaff25-processed-gene-294.3,VaccDscaff1-snap-gene-33.40,VaccDscaff35-augustus-gene-274.27,VaccDscaff36-augustus-gene-52.35,VaccDscaff4-snap-gene-377.41,VaccDscaff28-processed-gene-233.7,VaccDscaff1250-snap-gene-0.5,VaccDscaff28-processed-gene-226.7,	0.10216255611139556
Biological process	anatomical structure development	GO:0048856	3	0.008918398036846131	1.4806005997794123	31	11252	78	41918	VaccDscaff108-augustus-gene-4.25,VaccDscaff21-snap-gene-74.26,VaccDscaff34-snap-gene-0.29,VaccDscaff25-processed-gene-294.3,VaccDscaff27-augustus-gene-332.29,VaccDscaff27-augustus-gene-332.26,VaccDscaff29-processed-gene-153.14,VaccDscaff16-augustus-gene-45.47,VaccDscaff13-snap-gene-273.47,VaccDscaff43-snap-gene-219.34,VaccDscaff14-augustus-gene-370.56,VaccDscaff1-snap-gene-33.40,VaccDscaff34-augu…	0.10361770350704125
Biological process	response to bacterium	GO:0009617	6	0.009527817399210714	2.5073573393946647	9	1929	78	41918	VaccDscaff29-augustus-gene-52.36,VaccDscaff20-snap-gene-308.40,VaccDscaff19-augustus-gene-173.45,VaccDscaff29-processed-gene-153.14,VaccDscaff34-processed-gene-288.6,VaccDscaff11-augustus-gene-222.34,VaccDscaff16-augustus-gene-117.33,VaccDscaff39-augustus-gene-105.22,VaccDscaff43-augustus-gene-8.43,	0.10785977901927
Biological process	biological process involved in interspecies interaction between organisms	GO:0044419	2	0.009537150837095831	1.8749594641439387	16	4586	78	41918	VaccDscaff29-augustus-gene-52.36,VaccDscaff20-snap-gene-308.40,VaccDscaff19-augustus-gene-173.45,VaccDscaff29-processed-gene-153.14,VaccDscaff14-augustus-gene-370.56,VaccDscaff28-augustus-gene-57.28,VaccDscaff28-augustus-gene-54.26,VaccDscaff34-processed-gene-288.6,VaccDscaff35-augustus-gene-274.27,VaccDscaff36-augustus-gene-52.35,VaccDscaff4-snap-gene-377.41,VaccDscaff11-augustus-gene-222.34,Vac…	0.1065987872045015
Biological process	response to lipid	GO:0033993	5	0.009785294105499553	1.9825411303672174	14	3795	78	41918	VaccDscaff21-snap-gene-74.26,VaccDscaff25-processed-gene-294.3,VaccDscaff16-augustus-gene-45.47,VaccDscaff14-augustus-gene-370.56,VaccDscaff6-processed-gene-412.2,VaccDscaff34-processed-gene-288.6,VaccDscaff18-augustus-gene-353.32,VaccDscaff37-processed-gene-293.4,VaccDscaff16-augustus-gene-117.33,VaccDscaff28-processed-gene-233.7,VaccDscaff7-augustus-gene-379.12,VaccDscaff39-augustus-gene-105.22…	0.1080051836894513
Biological process	regulation of response to external stimulus	GO:0032101	5	0.011450127505830965	3.1893783763219967	6	1011	78	41918	VaccDscaff41-augustus-gene-230.43,VaccDscaff23-augustus-gene-116.28,VaccDscaff34-processed-gene-288.6,VaccDscaff16-augustus-gene-117.33,VaccDscaff43-augustus-gene-8.43,VaccDscaff46-processed-gene-1.10,	0.11756351846103189
Biological process	negative regulation of DNA-templated transcription	GO:0045892	10	0.012241638748459294	3.1427500374868798	6	1026	78	41918	VaccDscaff20-snap-gene-308.40,VaccDscaff25-processed-gene-294.3,VaccDscaff6-augustus-gene-247.26,VaccDscaff34-processed-gene-288.6,VaccDscaff28-processed-gene-233.7,VaccDscaff28-processed-gene-226.7,	0.1214535619650512
Biological process	obsolete negative regulation of cellular macromolecule biosynthetic process	GO:2000113	0	0.012390597918342294	2.8073670110983544	7	1340	78	41918	VaccDscaff2-processed-gene-430.10,VaccDscaff20-snap-gene-308.40,VaccDscaff25-processed-gene-294.3,VaccDscaff6-augustus-gene-247.26,VaccDscaff34-processed-gene-288.6,VaccDscaff28-processed-gene-233.7,VaccDscaff28-processed-gene-226.7,	0.1215655329099583
Biological process	negative regulation of RNA biosynthetic process	GO:1902679	9	0.015348309560331064	2.98837955371783	6	1079	78	41918	VaccDscaff20-snap-gene-308.40,VaccDscaff25-processed-gene-294.3,VaccDscaff6-augustus-gene-247.26,VaccDscaff34-processed-gene-288.6,VaccDscaff28-processed-gene-233.7,VaccDscaff28-processed-gene-226.7,	0.13286820923306206
Biological process	obsolete negative regulation of nucleic acid-templated transcription	GO:1903507	0	0.015348309560331064	2.98837955371783	6	1079	78	41918	VaccDscaff20-snap-gene-308.40,VaccDscaff25-processed-gene-294.3,VaccDscaff6-augustus-gene-247.26,VaccDscaff34-processed-gene-288.6,VaccDscaff28-processed-gene-233.7,VaccDscaff28-processed-gene-226.7,	0.13286820923306206
Biological process	immune system process	GO:0002376	2	0.015584603804422392	2.310889779117204	9	2093	78	41918	VaccDscaff29-augustus-gene-52.36,VaccDscaff14-augustus-gene-370.56,VaccDscaff28-augustus-gene-57.28,VaccDscaff28-augustus-gene-54.26,VaccDscaff34-processed-gene-288.6,VaccDscaff35-augustus-gene-274.27,VaccDscaff36-augustus-gene-52.35,VaccDscaff4-snap-gene-377.41,VaccDscaff16-augustus-gene-117.33,	0.13231928037793245
Biological process	shoot system development	GO:0048367	5	0.016148123583100027	1.992868688789579	12	3236	78	41918	VaccDscaff21-snap-gene-74.26,VaccDscaff25-processed-gene-294.3,VaccDscaff1-snap-gene-33.40,VaccDscaff34-processed-gene-288.6,VaccDscaff35-augustus-gene-274.27,VaccDscaff635-augustus-gene-0.6,VaccDscaff36-augustus-gene-52.35,VaccDscaff4-snap-gene-377.41,VaccDscaff28-processed-gene-233.7,VaccDscaff1250-snap-gene-0.5,VaccDscaff43-augustus-gene-8.43,VaccDscaff28-processed-gene-226.7,	0.1357980297512126
Biological process	multicellular organismal process	GO:0032501	2	0.016861320570123683	1.4451870767709047	29	10784	78	41918	VaccDscaff108-augustus-gene-4.25,VaccDscaff21-snap-gene-74.26,VaccDscaff145-augustus-gene-0.34,VaccDscaff34-snap-gene-0.29,VaccDscaff25-processed-gene-294.3,VaccDscaff27-augustus-gene-332.29,VaccDscaff27-augustus-gene-332.26,VaccDscaff29-processed-gene-153.14,VaccDscaff16-augustus-gene-45.47,VaccDscaff13-snap-gene-273.47,VaccDscaff43-snap-gene-219.34,VaccDscaff14-augustus-gene-370.56,VaccDscaff1-…	0.12304583523486953
Biological process	reproductive process	GO:0022414	2	0.017561402954210825	1.6458405660533322	19	6204	78	41918	VaccDscaff108-augustus-gene-4.25,VaccDscaff21-snap-gene-74.26,VaccDscaff25-processed-gene-294.3,VaccDscaff16-augustus-gene-45.47,VaccDscaff13-snap-gene-273.47,VaccDscaff43-snap-gene-219.34,VaccDscaff14-augustus-gene-370.56,VaccDscaff1-snap-gene-33.40,VaccDscaff18-augustus-gene-353.32,VaccDscaff35-augustus-gene-274.27,VaccDscaff3-snap-gene-159.14,VaccDscaff36-augustus-gene-52.35,VaccDscaff4-snap-g…	0.1271042525292472
Biological process	aromatic compound biosynthetic process	GO:0019438	5	0.018172378141909196	1.5202553222355204	24	8484	78	41918	VaccDscaff22-snap-gene-240.29,VaccDscaff2-processed-gene-430.10,VaccDscaff20-snap-gene-308.40,VaccDscaff11-snap-gene-221.30,VaccDscaff34-snap-gene-0.29,VaccDscaff25-processed-gene-294.3,VaccDscaff27-augustus-gene-332.29,VaccDscaff27-augustus-gene-332.26,VaccDscaff31-processed-gene-288.8,VaccDscaff13-snap-gene-273.47,VaccDscaff6-processed-gene-412.2,VaccDscaff6-augustus-gene-247.26,VaccDscaff34-au…	0.12940491854278885
Biological process	leaf development	GO:0048366	6	0.018716486992125247	2.5837031558185406	7	1456	78	41918	VaccDscaff21-snap-gene-74.26,VaccDscaff25-processed-gene-294.3,VaccDscaff34-processed-gene-288.6,VaccDscaff635-augustus-gene-0.6,VaccDscaff28-processed-gene-233.7,VaccDscaff43-augustus-gene-8.43,VaccDscaff28-processed-gene-226.7,	0.12712813856958918
Biological process	response to inorganic substance	GO:0010035	4	0.0187712885446345	1.8856500224921275	13	3705	78	41918	VaccDscaff29-processed-gene-153.14,VaccDscaff16-augustus-gene-45.47,VaccDscaff4-augustus-gene-359.28,VaccDscaff47-processed-gene-140.9,VaccDscaff36-snap-gene-25.34,VaccDscaff18-augustus-gene-353.32,VaccDscaff635-augustus-gene-0.6,VaccDscaff30-augustus-gene-337.33,VaccDscaff11-augustus-gene-222.34,VaccDscaff22-snap-gene-204.39,VaccDscaff7-augustus-gene-379.12,VaccDscaff43-augustus-gene-8.43,VaccDs…	0.12652708232757454
Biological process	reproduction	GO:0000003	2	0.018990666044097715	1.6326822628389623	19	6254	78	41918	VaccDscaff108-augustus-gene-4.25,VaccDscaff21-snap-gene-74.26,VaccDscaff25-processed-gene-294.3,VaccDscaff16-augustus-gene-45.47,VaccDscaff13-snap-gene-273.47,VaccDscaff43-snap-gene-219.34,VaccDscaff14-augustus-gene-370.56,VaccDscaff1-snap-gene-33.40,VaccDscaff18-augustus-gene-353.32,VaccDscaff35-augustus-gene-274.27,VaccDscaff3-snap-gene-159.14,VaccDscaff36-augustus-gene-52.35,VaccDscaff4-snap-g…	0.12703604634044155
Biological process	developmental process involved in reproduction	GO:0003006	3	0.01919708356880001	1.695300493407749	17	5389	78	41918	VaccDscaff108-augustus-gene-4.25,VaccDscaff21-snap-gene-74.26,VaccDscaff25-processed-gene-294.3,VaccDscaff16-augustus-gene-45.47,VaccDscaff13-snap-gene-273.47,VaccDscaff43-snap-gene-219.34,VaccDscaff14-augustus-gene-370.56,VaccDscaff1-snap-gene-33.40,VaccDscaff18-augustus-gene-353.32,VaccDscaff35-augustus-gene-274.27,VaccDscaff36-augustus-gene-52.35,VaccDscaff4-snap-gene-377.41,VaccDscaff28-proce…	0.1274513142199279
Biological process	biological process involved in symbiotic interaction	GO:0044403	3	0.020128733981769287	3.2065051098463986	5	838	78	41918	VaccDscaff35-augustus-gene-274.27,VaccDscaff36-augustus-gene-52.35,VaccDscaff4-snap-gene-377.41,VaccDscaff11-augustus-gene-222.34,VaccDscaff46-processed-gene-1.10,	0.13165683041409096
Biological process	organic cyclic compound biosynthetic process	GO:1901362	5	0.02025973895810762	1.4876820297039544	25	9031	78	41918	VaccDscaff22-snap-gene-240.29,VaccDscaff2-processed-gene-430.10,VaccDscaff20-snap-gene-308.40,VaccDscaff11-snap-gene-221.30,VaccDscaff34-snap-gene-0.29,VaccDscaff25-processed-gene-294.3,VaccDscaff27-augustus-gene-332.29,VaccDscaff27-augustus-gene-332.26,VaccDscaff31-processed-gene-288.8,VaccDscaff13-snap-gene-273.47,VaccDscaff6-processed-gene-412.2,VaccDscaff6-augustus-gene-247.26,VaccDscaff34-au…	0.12963296739136979
Biological process	regulation of shoot system development	GO:0048831	5	0.020396018384633674	2.8014435607832655	6	1151	78	41918	VaccDscaff25-processed-gene-294.3,VaccDscaff34-processed-gene-288.6,VaccDscaff28-processed-gene-233.7,VaccDscaff1250-snap-gene-0.5,VaccDscaff43-augustus-gene-8.43,VaccDscaff28-processed-gene-226.7,	0.12506725162244123
Biological process	negative regulation of macromolecule biosynthetic process	GO:0010558	7	0.0220449959482506	2.4979228385602887	7	1506	78	41918	VaccDscaff2-processed-gene-430.10,VaccDscaff20-snap-gene-308.40,VaccDscaff25-processed-gene-294.3,VaccDscaff6-augustus-gene-247.26,VaccDscaff34-processed-gene-288.6,VaccDscaff28-processed-gene-233.7,VaccDscaff28-processed-gene-226.7,	0.1342464236021054
Biological process	developmental process	GO:0032502	2	0.02226173571474277	1.389815462477513	31	11987	78	41918	VaccDscaff108-augustus-gene-4.25,VaccDscaff21-snap-gene-74.26,VaccDscaff34-snap-gene-0.29,VaccDscaff25-processed-gene-294.3,VaccDscaff27-augustus-gene-332.29,VaccDscaff27-augustus-gene-332.26,VaccDscaff29-processed-gene-153.14,VaccDscaff16-augustus-gene-45.47,VaccDscaff13-snap-gene-273.47,VaccDscaff43-snap-gene-219.34,VaccDscaff14-augustus-gene-370.56,VaccDscaff1-snap-gene-33.40,VaccDscaff34-augu…	0.1310474175741191
Biological process	response to hormone	GO:0009725	5	0.02488888371424447	1.6151919544806503	18	5989	78	41918	VaccDscaff34-processed-gene-9.9,VaccDscaff21-snap-gene-74.26,VaccDscaff20-snap-gene-308.40,VaccDscaff25-processed-gene-294.3,VaccDscaff16-augustus-gene-45.47,VaccDscaff43-snap-gene-219.34,VaccDscaff14-augustus-gene-370.56,VaccDscaff6-processed-gene-412.2,VaccDscaff34-processed-gene-288.6,VaccDscaff18-augustus-gene-353.32,VaccDscaff37-processed-gene-293.4,VaccDscaff11-augustus-gene-222.34,VaccDsca…	0.1399801549024068
Biological process	response to temperature stimulus	GO:0009266	4	0.025163850411245137	2.1269535214126245	9	2274	78	41918	VaccDscaff34-processed-gene-9.9,VaccDscaff29-processed-gene-153.14,VaccDscaff16-augustus-gene-45.47,VaccDscaff41-augustus-gene-230.43,VaccDscaff18-augustus-gene-353.32,VaccDscaff11-augustus-gene-222.34,VaccDscaff7-augustus-gene-379.12,VaccDscaff43-augustus-gene-8.43,VaccDscaff5-augustus-gene-117.19,	0.13974641454798398
Biological process	regulation of DNA-templated transcription	GO:0006355	9	0.025689977621447757	1.6095481889159093	18	6010	78	41918	VaccDscaff2-processed-gene-430.10,VaccDscaff20-snap-gene-308.40,VaccDscaff34-snap-gene-0.29,VaccDscaff25-processed-gene-294.3,VaccDscaff27-augustus-gene-332.29,VaccDscaff27-augustus-gene-332.26,VaccDscaff31-processed-gene-288.8,VaccDscaff13-snap-gene-273.47,VaccDscaff6-processed-gene-412.2,VaccDscaff6-augustus-gene-247.26,VaccDscaff34-augustus-gene-0.23,VaccDscaff34-processed-gene-288.6,VaccDscaf…	0.1417765639983648
Biological process	negative regulation of RNA metabolic process	GO:0051253	8	0.025837428321624833	2.6516953441295548	6	1216	78	41918	VaccDscaff20-snap-gene-308.40,VaccDscaff25-processed-gene-294.3,VaccDscaff6-augustus-gene-247.26,VaccDscaff34-processed-gene-288.6,VaccDscaff28-processed-gene-233.7,VaccDscaff28-processed-gene-226.7,	0.13420264239996899
Biological process	negative regulation of cellular biosynthetic process	GO:0031327	7	0.026240642870988817	2.408368626678486	7	1562	78	41918	VaccDscaff2-processed-gene-430.10,VaccDscaff20-snap-gene-308.40,VaccDscaff25-processed-gene-294.3,VaccDscaff6-augustus-gene-247.26,VaccDscaff34-processed-gene-288.6,VaccDscaff28-processed-gene-233.7,VaccDscaff28-processed-gene-226.7,	0.13549992780750367
Biological process	negative regulation of biosynthetic process	GO:0009890	6	0.02836390848506687	2.368936898533876	7	1588	78	41918	VaccDscaff2-processed-gene-430.10,VaccDscaff20-snap-gene-308.40,VaccDscaff25-processed-gene-294.3,VaccDscaff6-augustus-gene-247.26,VaccDscaff34-processed-gene-288.6,VaccDscaff28-processed-gene-233.7,VaccDscaff28-processed-gene-226.7,	0.14070410782198903
Biological process	regulation of RNA biosynthetic process	GO:2001141	8	0.03017209888487571	1.5808767143952631	18	6119	78	41918	VaccDscaff2-processed-gene-430.10,VaccDscaff20-snap-gene-308.40,VaccDscaff34-snap-gene-0.29,VaccDscaff25-processed-gene-294.3,VaccDscaff27-augustus-gene-332.29,VaccDscaff27-augustus-gene-332.26,VaccDscaff31-processed-gene-288.8,VaccDscaff13-snap-gene-273.47,VaccDscaff6-processed-gene-412.2,VaccDscaff6-augustus-gene-247.26,VaccDscaff34-augustus-gene-0.23,VaccDscaff34-processed-gene-288.6,VaccDscaf…	0.14558449899095766
Biological process	obsolete regulation of nucleic acid-templated transcription	GO:1903506	0	0.03017209888487571	1.5808767143952631	18	6119	78	41918	VaccDscaff2-processed-gene-430.10,VaccDscaff20-snap-gene-308.40,VaccDscaff34-snap-gene-0.29,VaccDscaff25-processed-gene-294.3,VaccDscaff27-augustus-gene-332.29,VaccDscaff27-augustus-gene-332.26,VaccDscaff31-processed-gene-288.8,VaccDscaff13-snap-gene-273.47,VaccDscaff6-processed-gene-412.2,VaccDscaff6-augustus-gene-247.26,VaccDscaff34-augustus-gene-0.23,VaccDscaff34-processed-gene-288.6,VaccDscaf…	0.14558449899095766
Biological process	response to oxygen-containing compound	GO:1901700	4	0.03173312467716727	1.5461530696236936	19	6604	78	41918	VaccDscaff2-processed-gene-430.10,VaccDscaff21-snap-gene-74.26,VaccDscaff20-snap-gene-308.40,VaccDscaff19-augustus-gene-173.45,VaccDscaff25-processed-gene-294.3,VaccDscaff16-augustus-gene-45.47,VaccDscaff14-augustus-gene-370.56,VaccDscaff6-processed-gene-412.2,VaccDscaff34-processed-gene-288.6,VaccDscaff18-augustus-gene-353.32,VaccDscaff37-processed-gene-293.4,VaccDscaff635-augustus-gene-0.6,Vacc…	0.14904441005286542
Biological process	biosynthetic process	GO:0009058	3	0.031811533533119274	1.314145111043036	35	14313	78	41918	VaccDscaff108-augustus-gene-4.25,VaccDscaff22-snap-gene-240.29,VaccDscaff2-processed-gene-430.10,VaccDscaff21-snap-gene-74.26,VaccDscaff20-snap-gene-308.40,VaccDscaff11-snap-gene-221.30,VaccDscaff34-snap-gene-0.29,VaccDscaff25-processed-gene-294.3,VaccDscaff27-augustus-gene-332.29,VaccDscaff27-augustus-gene-332.26,VaccDscaff31-processed-gene-288.8,VaccDscaff13-snap-gene-273.47,VaccDscaff6-process…	0.14862213814679534
Biological process	response to endogenous stimulus	GO:0009719	3	0.03227928571912286	1.56882656752913	18	6166	78	41918	VaccDscaff34-processed-gene-9.9,VaccDscaff21-snap-gene-74.26,VaccDscaff20-snap-gene-308.40,VaccDscaff25-processed-gene-294.3,VaccDscaff16-augustus-gene-45.47,VaccDscaff43-snap-gene-219.34,VaccDscaff14-augustus-gene-370.56,VaccDscaff6-processed-gene-412.2,VaccDscaff34-processed-gene-288.6,VaccDscaff18-augustus-gene-353.32,VaccDscaff37-processed-gene-293.4,VaccDscaff11-augustus-gene-222.34,VaccDsca…	0.1500137331051868
Biological process	obsolete oxidation-reduction process	GO:0055114	0	0.03242827833261952	1.8018784791626368	12	3579	78	41918	VaccDscaff108-augustus-gene-4.25,VaccDscaff22-snap-gene-240.29,VaccDscaff21-snap-gene-74.26,VaccDscaff38-augustus-gene-85.18,VaccDscaff46-augustus-gene-104.22,VaccDscaff47-processed-gene-140.9,VaccDscaff36-snap-gene-25.34,VaccDscaff377-augustus-gene-0.27,VaccDscaff221-processed-gene-1.7,VaccDscaff5-augustus-gene-117.19,VaccDscaff23-processed-gene-327.10,VaccDscaff34-snap-gene-253.35,	0.1491363008734533
Biological process	regulation of post-embryonic development	GO:0048580	6	0.033517223605325164	2.2854628158394865	7	1646	78	41918	VaccDscaff25-processed-gene-294.3,VaccDscaff29-processed-gene-153.14,VaccDscaff3-snap-gene-159.14,VaccDscaff28-processed-gene-233.7,VaccDscaff1250-snap-gene-0.5,VaccDscaff43-augustus-gene-8.43,VaccDscaff28-processed-gene-226.7,	0.14797854221751058
Biological process	regulation of response to stress	GO:0080134	5	0.03792488006277839	2.2246432849626223	7	1691	78	41918	VaccDscaff20-snap-gene-308.40,VaccDscaff41-augustus-gene-230.43,VaccDscaff23-augustus-gene-116.28,VaccDscaff34-processed-gene-288.6,VaccDscaff16-augustus-gene-117.33,VaccDscaff43-augustus-gene-8.43,VaccDscaff46-processed-gene-1.10,	0.15946509093063485
Biological process	DNA-templated transcription	GO:0006351	9	0.03932594564977132	1.5335105604604655	18	6308	78	41918	VaccDscaff2-processed-gene-430.10,VaccDscaff20-snap-gene-308.40,VaccDscaff34-snap-gene-0.29,VaccDscaff25-processed-gene-294.3,VaccDscaff27-augustus-gene-332.29,VaccDscaff27-augustus-gene-332.26,VaccDscaff31-processed-gene-288.8,VaccDscaff13-snap-gene-273.47,VaccDscaff6-processed-gene-412.2,VaccDscaff6-augustus-gene-247.26,VaccDscaff34-augustus-gene-0.23,VaccDscaff34-processed-gene-288.6,VaccDscaf…	0.16076300929975962
Biological process	negative regulation of nucleobase-containing compound metabolic process	GO:0045934	7	0.03969942209371724	2.3920337822414974	6	1348	78	41918	VaccDscaff20-snap-gene-308.40,VaccDscaff25-processed-gene-294.3,VaccDscaff6-augustus-gene-247.26,VaccDscaff34-processed-gene-288.6,VaccDscaff28-processed-gene-233.7,VaccDscaff28-processed-gene-226.7,	0.16154188805876646
Biological process	response to salt stress	GO:0009651	5	0.044492273864598086	2.0165488045412996	8	2132	78	41918	VaccDscaff16-augustus-gene-45.47,VaccDscaff18-augustus-gene-353.32,VaccDscaff12-processed-gene-301.1,VaccDscaff22-processed-gene-49.1,VaccDscaff11-augustus-gene-222.34,VaccDscaff16-augustus-gene-117.33,VaccDscaff7-augustus-gene-379.12,VaccDscaff43-augustus-gene-8.43,	0.1785758082838187
Biological process	lipid metabolic process	GO:0006629	4	0.044635138247921424	1.8354175423847552	10	2928	78	41918	VaccDscaff22-snap-gene-240.29,VaccDscaff21-snap-gene-74.26,VaccDscaff11-snap-gene-221.30,VaccDscaff38-augustus-gene-85.18,VaccDscaff46-augustus-gene-104.22,VaccDscaff47-processed-gene-140.9,VaccDscaff36-snap-gene-25.34,VaccDscaff377-augustus-gene-0.27,VaccDscaff221-processed-gene-1.7,VaccDscaff117-augustus-gene-3.69,	0.17833858404033764
Biological process	RNA biosynthetic process	GO:0032774	8	0.0483875678509349	1.4962698554345888	18	6465	78	41918	VaccDscaff2-processed-gene-430.10,VaccDscaff20-snap-gene-308.40,VaccDscaff34-snap-gene-0.29,VaccDscaff25-processed-gene-294.3,VaccDscaff27-augustus-gene-332.29,VaccDscaff27-augustus-gene-332.26,VaccDscaff31-processed-gene-288.8,VaccDscaff13-snap-gene-273.47,VaccDscaff6-processed-gene-412.2,VaccDscaff6-augustus-gene-247.26,VaccDscaff34-augustus-gene-0.23,VaccDscaff34-processed-gene-288.6,VaccDscaf…	0.18989432183278007
Biological process	regulation of reproductive process	GO:2000241	4	0.04840220232195125	2.27716210343329	6	1416	78	41918	VaccDscaff25-processed-gene-294.3,VaccDscaff3-snap-gene-159.14,VaccDscaff28-processed-gene-233.7,VaccDscaff1250-snap-gene-0.5,VaccDscaff43-augustus-gene-8.43,VaccDscaff28-processed-gene-226.7,	0.18911125951452634
