# Supplementary material for: Supplementary Low Far-Red Light Promotes Proliferation and Photosynthetic Capacity of Blueberry In Vitro Plantlets
Source: Int J Mol Sci. 2024 Jan 5;25(2):688. doi: 10.3390/ijms25020688 (PMC10815622; doi:10.3390/ijms25020688)
Supplement: Supplementary file 1 [file ijms-25-00688-s001.zip › Supplementary Materials/Table S5 stem yellow_go_predictions.xlsx]

## Sheet: Sheet1
plant organ development GO:0099402	gene predictions	response to brassinosteroid GO:0009741	gene predictions	anatomical structure development GO:0048856	gene predictions	shoot system development GO:0048367	gene predictions	regulation of shoot system development GO:0048831	gene predictions	response to hormone GO:0009725	gene predictions
VaccDscaff21-snap-gene-74.26	GA20OX1	VaccDscaff25-processed-gene-294.3	RAV1	VaccDscaff108-augustus-gene-4.25	CYP78A9	VaccDscaff21-snap-gene-74.26	GA20OX1	VaccDscaff25-processed-gene-294.3	RAV1	VaccDscaff34-processed-gene-9.9	GER3
VaccDscaff34-snap-gene-0.29	ERF74	VaccDscaff6-processed-gene-412.2	IBL1	VaccDscaff21-snap-gene-74.26	GA20OX1	VaccDscaff25-processed-gene-294.3	RAV1	VaccDscaff34-processed-gene-288.6	WRKY70	VaccDscaff21-snap-gene-74.26	GA20OX1
VaccDscaff25-processed-gene-294.3	RAV1	VaccDscaff37-processed-gene-293.4	P1R1	VaccDscaff34-snap-gene-0.29	ERF74	VaccDscaff1-snap-gene-33.40	OVA2	VaccDscaff28-processed-gene-233.7	RAV1	VaccDscaff20-snap-gene-308.40	WRKY40
VaccDscaff27-augustus-gene-332.29	ERF74	VaccDscaff28-processed-gene-233.7	RAV1	VaccDscaff25-processed-gene-294.3	RAV1	VaccDscaff34-processed-gene-288.6	WRKY70	VaccDscaff1250-snap-gene-0.5	FLK	VaccDscaff25-processed-gene-294.3	RAV1
VaccDscaff27-augustus-gene-332.26	ERF74	VaccDscaff28-processed-gene-226.7	RAV1	VaccDscaff27-augustus-gene-332.29	ERF74	VaccDscaff35-augustus-gene-274.27	CEP1	VaccDscaff43-augustus-gene-8.43	LEA5	VaccDscaff16-augustus-gene-45.47	AATP1
VaccDscaff14-augustus-gene-370.56	ELK4			VaccDscaff27-augustus-gene-332.26	ERF74	VaccDscaff635-augustus-gene-0.6	NPF7.3	VaccDscaff28-processed-gene-226.7	RAV1	VaccDscaff43-snap-gene-219.34	RLG1
VaccDscaff1-snap-gene-33.40	OVA2			VaccDscaff29-processed-gene-153.14	HSC70	VaccDscaff36-augustus-gene-52.35	CEP1			VaccDscaff14-augustus-gene-370.56	ELK4
VaccDscaff34-augustus-gene-0.23	ERF74			VaccDscaff16-augustus-gene-45.47	AATP1	VaccDscaff4-snap-gene-377.41	CEP1			VaccDscaff6-processed-gene-412.2	IBL1
VaccDscaff34-processed-gene-288.6	WRKY70			VaccDscaff13-snap-gene-273.47	RSM2	VaccDscaff28-processed-gene-233.7	RAV1			VaccDscaff34-processed-gene-288.6	WRKY70
VaccDscaff35-augustus-gene-274.27	CEP1			VaccDscaff43-snap-gene-219.34	RLG1	VaccDscaff1250-snap-gene-0.5	FLK			VaccDscaff18-augustus-gene-353.32	AATP1
VaccDscaff17-augustus-gene-368.24	RAP2.2			VaccDscaff14-augustus-gene-370.56	ELK4	VaccDscaff43-augustus-gene-8.43	LEA5			VaccDscaff37-processed-gene-293.4	P1R1
VaccDscaff635-augustus-gene-0.6	NPF7.3			VaccDscaff1-snap-gene-33.40	OVA2	VaccDscaff28-processed-gene-226.7	RAV1			VaccDscaff11-augustus-gene-222.34	PCAP1
VaccDscaff36-augustus-gene-52.35	CEP1			VaccDscaff34-augustus-gene-0.23	ERF74					VaccDscaff16-augustus-gene-117.33	GAP1
VaccDscaff4-snap-gene-377.41	CEP1			VaccDscaff34-processed-gene-288.6	WRKY70					VaccDscaff28-processed-gene-233.7	RAV1
VaccDscaff28-processed-gene-233.7	RAV1			VaccDscaff18-augustus-gene-353.32	AATP1					VaccDscaff7-augustus-gene-379.12	AATP1
VaccDscaff43-augustus-gene-8.43	LEA5			VaccDscaff35-augustus-gene-274.27	CEP1					VaccDscaff39-augustus-gene-105.22	WRKY51
VaccDscaff28-processed-gene-226.7	RAV1			VaccDscaff17-augustus-gene-368.24	RAP2.2					VaccDscaff43-augustus-gene-8.43	LEA5
				VaccDscaff635-augustus-gene-0.6	NPF7.3					VaccDscaff28-processed-gene-226.7	RAV1
				VaccDscaff377-augustus-gene-0.27	CYP707A4
				VaccDscaff3-snap-gene-159.14	CDF3
				VaccDscaff36-augustus-gene-52.35	CEP1
				VaccDscaff31-snap-gene-336.39	AT5G07850.1
				VaccDscaff4-snap-gene-377.41	CEP1
				VaccDscaff11-augustus-gene-222.34	PCAP1
				VaccDscaff28-processed-gene-233.7	RAV1
				VaccDscaff7-augustus-gene-379.12	AATP1
				VaccDscaff1250-snap-gene-0.5	FLK
				VaccDscaff43-augustus-gene-8.43	LEA5
				VaccDscaff28-processed-gene-226.7	RAV1
				VaccDscaff25-snap-gene-238.26	EXPA1
				VaccDscaff34-snap-gene-253.35	LAC8
