# Supplementary material for: Supplementary Low Far-Red Light Promotes Proliferation and Photosynthetic Capacity of Blueberry In Vitro Plantlets
Source: Int J Mol Sci. 2024 Jan 5;25(2):688. doi: 10.3390/ijms25020688 (PMC10815622; doi:10.3390/ijms25020688)
Supplement: Supplementary file 1 [file ijms-25-00688-s001.zip › Supplementary Materials/Table S6 stem_brown_GO.xls]

Class	GO_Name	GO_ID	GO_Level	P_value	EnrichmentScore	HitsGenesCountsInSelectedSet	HitsGenesCountsInBackground	AllGenesCountsInSelectedSet	AllGenesCountsInBackground	GenesOfSelectedSetInGOterm	corrected p-value(BH method)
Molecular function	inorganic molecular entity transmembrane transporter activity	GO:0015318	4	4.29E-04	3.295701696	11	1940	62	36037	VaccDscaff8-augustus-gene-279.41,VaccDscaff32-augustus-gene-179.26,VaccDscaff19-augustus-gene-340.29,VaccDscaff22-augustus-gene-62.24,VaccDscaff5-snap-gene-137.21,VaccDscaff36-snap-gene-54.58,VaccDscaff38-processed-gene-77.3,VaccDscaff28-augustus-gene-108.25,VaccDscaff15-augustus-gene-210.26,VaccDscaff22-augustus-gene-355.22,VaccDscaff3-snap-gene-165.27,	0.015432863
Molecular function	monoatomic anion transmembrane transporter activity	GO:0008509	5	4.51E-04	5.066866187	7	803	62	36037	VaccDscaff32-augustus-gene-179.26,VaccDscaff19-augustus-gene-340.29,VaccDscaff22-augustus-gene-62.24,VaccDscaff36-snap-gene-54.58,VaccDscaff38-processed-gene-77.3,VaccDscaff15-augustus-gene-210.26,VaccDscaff3-snap-gene-165.27,	0.013913235
Molecular function	active transmembrane transporter activity	GO:0022804	4	0.001342464	3.708082523	8	1254	62	36037	VaccDscaff8-augustus-gene-279.41,VaccDscaff32-augustus-gene-179.26,VaccDscaff19-augustus-gene-340.29,VaccDscaff22-augustus-gene-62.24,VaccDscaff5-snap-gene-137.21,VaccDscaff38-processed-gene-77.3,VaccDscaff29-processed-gene-50.15,VaccDscaff22-augustus-gene-355.22,	0.036246523
Molecular function	secondary active transmembrane transporter activity	GO:0015291	5	0.002716499	5.217611629	5	557	62	36037	VaccDscaff8-augustus-gene-279.41,VaccDscaff19-augustus-gene-340.29,VaccDscaff22-augustus-gene-62.24,VaccDscaff5-snap-gene-137.21,VaccDscaff22-augustus-gene-355.22,	0.045135673
Molecular function	transmembrane transporter activity	GO:0022857	3	0.007891257	2.172190354	12	3211	62	36037	VaccDscaff8-augustus-gene-279.41,VaccDscaff32-augustus-gene-179.26,VaccDscaff19-augustus-gene-340.29,VaccDscaff22-augustus-gene-62.24,VaccDscaff5-snap-gene-137.21,VaccDscaff36-snap-gene-54.58,VaccDscaff38-processed-gene-77.3,VaccDscaff28-augustus-gene-108.25,VaccDscaff15-augustus-gene-210.26,VaccDscaff29-processed-gene-50.15,VaccDscaff22-augustus-gene-355.22,VaccDscaff3-snap-gene-165.27,	0.089711135
Molecular function	transporter activity	GO:0005215	2	0.015546431	1.984325242	12	3515	62	36037	VaccDscaff8-augustus-gene-279.41,VaccDscaff32-augustus-gene-179.26,VaccDscaff19-augustus-gene-340.29,VaccDscaff22-augustus-gene-62.24,VaccDscaff5-snap-gene-137.21,VaccDscaff36-snap-gene-54.58,VaccDscaff38-processed-gene-77.3,VaccDscaff28-augustus-gene-108.25,VaccDscaff15-augustus-gene-210.26,VaccDscaff29-processed-gene-50.15,VaccDscaff22-augustus-gene-355.22,VaccDscaff3-snap-gene-165.27,	0.146001262
Molecular function	monoatomic ion transmembrane transporter activity	GO:0015075	4	0.021068573	2.320327088	8	2004	62	36037	VaccDscaff32-augustus-gene-179.26,VaccDscaff19-augustus-gene-340.29,VaccDscaff22-augustus-gene-62.24,VaccDscaff36-snap-gene-54.58,VaccDscaff38-processed-gene-77.3,VaccDscaff15-augustus-gene-210.26,VaccDscaff22-augustus-gene-355.22,VaccDscaff3-snap-gene-165.27,	0.168548587
Molecular function	protein homodimerization activity	GO:0042803	5	0.022952743	3.085148278	5	942	62	36037	VaccDscaff30-augustus-gene-326.25,VaccDscaff24-snap-gene-244.27,VaccDscaff32-augustus-gene-179.26,VaccDscaff38-processed-gene-77.3,VaccDscaff25-processed-gene-190.14,	0.165259751
Molecular function	salt transmembrane transporter activity	GO:1901702	4	0.030028209	2.871748693	5	1012	62	36037	VaccDscaff19-augustus-gene-340.29,VaccDscaff22-augustus-gene-62.24,VaccDscaff36-snap-gene-54.58,VaccDscaff28-augustus-gene-108.25,VaccDscaff3-snap-gene-165.27,	0.180169256
Molecular function	protein dimerization activity	GO:0046983	4	0.038743509	2.678534265	5	1085	62	36037	VaccDscaff30-augustus-gene-326.25,VaccDscaff24-snap-gene-244.27,VaccDscaff32-augustus-gene-179.26,VaccDscaff38-processed-gene-77.3,VaccDscaff25-processed-gene-190.14,	0.185968842
Cellular component	cell periphery	GO:0071944	3	0.011811134	1.466076724	30	11098	77	41761	VaccDscaff2-processed-gene-17.4,VaccDscaff33-augustus-gene-315.23,VaccDscaff36-snap-gene-221.42,VaccDscaff53-augustus-gene-7.27,VaccDscaff10-augustus-gene-12.39,VaccDscaff39-augustus-gene-204.18,VaccDscaff14-augustus-gene-36.26,VaccDscaff13-augustus-gene-287.20,VaccDscaff47-augustus-gene-81.34,VaccDscaff18-augustus-gene-150.14,VaccDscaff26-augustus-gene-82.28,VaccDscaff32-snap-gene-264.37,VaccDsc…	0.547249214
Cellular component	membrane	GO:0016020	3	0.023795001	1.302042187	39	16245	77	41761	VaccDscaff2-processed-gene-17.4,VaccDscaff36-snap-gene-221.42,VaccDscaff53-augustus-gene-7.27,VaccDscaff9-augustus-gene-15.29,VaccDscaff21-snap-gene-19.36,VaccDscaff39-augustus-gene-204.18,VaccDscaff14-augustus-gene-36.26,VaccDscaff13-augustus-gene-287.20,VaccDscaff47-augustus-gene-81.34,VaccDscaff18-augustus-gene-150.14,VaccDscaff35-augustus-gene-34.47,VaccDscaff26-augustus-gene-82.28,VaccDscaff…	0.826876268
Biological process	response to wounding	GO:0009611	4	4.40E-07	6.247714626	12	1088	74	41918	VaccDscaff21-snap-gene-19.36,VaccDscaff8-processed-gene-335.15,VaccDscaff37-augustus-gene-172.29,VaccDscaff2-augustus-gene-198.27,VaccDscaff30-augustus-gene-326.25,VaccDscaff36-augustus-gene-33.17,VaccDscaff32-augustus-gene-179.26,VaccDscaff3-processed-gene-42.8,VaccDscaff36-snap-gene-54.58,VaccDscaff38-processed-gene-77.3,VaccDscaff36-snap-gene-66.31,VaccDscaff25-augustus-gene-212.27,	3.84E-04
Biological process	leaf senescence	GO:0010150	4	5.01E-06	8.423188988	8	538	74	41918	VaccDscaff2-processed-gene-17.4,VaccDscaff2-augustus-gene-198.27,VaccDscaff5-augustus-gene-293.26,VaccDscaff30-augustus-gene-326.25,VaccDscaff3-processed-gene-42.8,VaccDscaff22-augustus-gene-62.24,VaccDscaff26-augustus-gene-75.25,VaccDscaff25-augustus-gene-212.27,	0.002188195
Biological process	plant organ senescence	GO:0090693	3	6.98E-06	8.049157506	8	563	74	41918	VaccDscaff2-processed-gene-17.4,VaccDscaff2-augustus-gene-198.27,VaccDscaff5-augustus-gene-293.26,VaccDscaff30-augustus-gene-326.25,VaccDscaff3-processed-gene-42.8,VaccDscaff22-augustus-gene-62.24,VaccDscaff26-augustus-gene-75.25,VaccDscaff25-augustus-gene-212.27,	0.002030426
Biological process	monoatomic anion transmembrane transport	GO:0098656	7	3.48E-05	5.547481105	9	919	74	41918	VaccDscaff8-augustus-gene-279.41,VaccDscaff32-augustus-gene-179.26,VaccDscaff19-augustus-gene-340.29,VaccDscaff22-augustus-gene-62.24,VaccDscaff5-snap-gene-137.21,VaccDscaff36-snap-gene-54.58,VaccDscaff38-processed-gene-77.3,VaccDscaff15-augustus-gene-210.26,VaccDscaff3-snap-gene-165.27,	0.005060792
Biological process	leaf development	GO:0048366	6	4.80E-05	4.279570092	11	1456	74	41918	VaccDscaff2-processed-gene-17.4,VaccDscaff2-augustus-gene-198.27,VaccDscaff5-augustus-gene-293.26,VaccDscaff30-augustus-gene-326.25,VaccDscaff32-augustus-gene-179.26,VaccDscaff3-processed-gene-42.8,VaccDscaff22-augustus-gene-62.24,VaccDscaff26-augustus-gene-75.25,VaccDscaff38-processed-gene-77.3,VaccDscaff25-augustus-gene-212.27,VaccDscaff1-augustus-gene-237.23,	0.004655566
Biological process	response to salt	GO:1902074	4	2.31E-04	3.579008647	11	1741	74	41918	VaccDscaff53-augustus-gene-7.27,VaccDscaff2-augustus-gene-198.27,VaccDscaff30-augustus-gene-326.25,VaccDscaff377-augustus-gene-0.29,VaccDscaff35-augustus-gene-168.29,VaccDscaff2-augustus-gene-412.32,VaccDscaff19-augustus-gene-340.29,VaccDscaff22-augustus-gene-62.24,VaccDscaff36-snap-gene-54.58,VaccDscaff25-processed-gene-190.14,VaccDscaff25-augustus-gene-212.27,	0.015540797
Biological process	monoatomic anion transport	GO:0006820	6	4.40E-04	3.955108716	9	1289	74	41918	VaccDscaff8-augustus-gene-279.41,VaccDscaff32-augustus-gene-179.26,VaccDscaff19-augustus-gene-340.29,VaccDscaff22-augustus-gene-62.24,VaccDscaff5-snap-gene-137.21,VaccDscaff36-snap-gene-54.58,VaccDscaff38-processed-gene-77.3,VaccDscaff15-augustus-gene-210.26,VaccDscaff3-snap-gene-165.27,	0.025578996
Biological process	phyllome development	GO:0048827	5	8.39E-04	3.069484756	11	2030	74	41918	VaccDscaff2-processed-gene-17.4,VaccDscaff2-augustus-gene-198.27,VaccDscaff5-augustus-gene-293.26,VaccDscaff30-augustus-gene-326.25,VaccDscaff32-augustus-gene-179.26,VaccDscaff3-processed-gene-42.8,VaccDscaff22-augustus-gene-62.24,VaccDscaff26-augustus-gene-75.25,VaccDscaff38-processed-gene-77.3,VaccDscaff25-augustus-gene-212.27,VaccDscaff1-augustus-gene-237.23,	0.043081106
Biological process	response to osmotic stress	GO:0006970	4	0.001009136	2.818206266	12	2412	74	41918	VaccDscaff26-snap-gene-44.75,VaccDscaff53-augustus-gene-7.27,VaccDscaff8-processed-gene-335.15,VaccDscaff2-augustus-gene-198.27,VaccDscaff30-augustus-gene-326.25,VaccDscaff32-augustus-gene-179.26,VaccDscaff3-processed-gene-42.8,VaccDscaff19-augustus-gene-340.29,VaccDscaff38-processed-gene-77.3,VaccDscaff25-processed-gene-190.14,VaccDscaff25-augustus-gene-212.27,VaccDscaff35-augustus-gene-210.20,	0.046367156
Biological process	monoatomic ion transmembrane transport	GO:0034220	6	0.00200973	2.752232356	11	2264	74	41918	VaccDscaff8-augustus-gene-279.41,VaccDscaff32-augustus-gene-179.26,VaccDscaff19-augustus-gene-340.29,VaccDscaff22-augustus-gene-62.24,VaccDscaff5-snap-gene-137.21,VaccDscaff36-snap-gene-54.58,VaccDscaff38-processed-gene-77.3,VaccDscaff28-augustus-gene-108.25,VaccDscaff15-augustus-gene-210.26,VaccDscaff22-augustus-gene-355.22,VaccDscaff3-snap-gene-165.27,	0.083547355
Biological process	obsolete aging	GO:0007568	0	0.002113496	5.553524112	5	510	74	41918	VaccDscaff2-processed-gene-17.4,VaccDscaff30-augustus-gene-326.25,VaccDscaff3-processed-gene-42.8,VaccDscaff22-augustus-gene-62.24,VaccDscaff26-augustus-gene-75.25,	0.08022096
Biological process	monoatomic ion transport	GO:0006811	5	0.003454778	2.432896748	12	2794	74	41918	VaccDscaff8-augustus-gene-279.41,VaccDscaff32-augustus-gene-179.26,VaccDscaff19-augustus-gene-340.29,VaccDscaff22-augustus-gene-62.24,VaccDscaff5-snap-gene-137.21,VaccDscaff36-snap-gene-54.58,VaccDscaff38-processed-gene-77.3,VaccDscaff28-augustus-gene-108.25,VaccDscaff15-augustus-gene-210.26,VaccDscaff22-augustus-gene-355.22,VaccDscaff3-snap-gene-165.27,VaccDscaff1-augustus-gene-237.23,	0.116000802
Biological process	response to acid chemical	GO:0001101	4	0.004047942	2.04590324	16	4430	74	41918	VaccDscaff2-processed-gene-17.4,VaccDscaff53-augustus-gene-7.27,VaccDscaff2-augustus-gene-198.27,VaccDscaff30-augustus-gene-326.25,VaccDscaff377-augustus-gene-0.29,VaccDscaff36-augustus-gene-33.17,VaccDscaff32-augustus-gene-179.26,VaccDscaff35-augustus-gene-168.29,VaccDscaff3-processed-gene-42.8,VaccDscaff2-augustus-gene-412.32,VaccDscaff22-augustus-gene-62.24,VaccDscaff36-snap-gene-54.58,VaccDsc…	0.126209042
Biological process	response to salt stress	GO:0009651	5	0.004173018	2.656939303	10	2132	74	41918	VaccDscaff26-snap-gene-44.75,VaccDscaff2-augustus-gene-198.27,VaccDscaff30-augustus-gene-326.25,VaccDscaff32-augustus-gene-179.26,VaccDscaff3-processed-gene-42.8,VaccDscaff19-augustus-gene-340.29,VaccDscaff38-processed-gene-77.3,VaccDscaff25-processed-gene-190.14,VaccDscaff25-augustus-gene-212.27,VaccDscaff35-augustus-gene-210.20,	0.125622218
Biological process	positive regulation of developmental process	GO:0051094	5	0.010238557	3.806851206	5	744	74	41918	VaccDscaff2-augustus-gene-198.27,VaccDscaff35-augustus-gene-34.47,VaccDscaff5-augustus-gene-293.26,VaccDscaff30-augustus-gene-326.25,VaccDscaff25-augustus-gene-212.27,	0.194310001
Biological process	secondary metabolic process	GO:0019748	3	0.011187523	2.860906361	7	1386	74	41918	VaccDscaff8-processed-gene-335.15,VaccDscaff37-augustus-gene-172.29,VaccDscaff24-snap-gene-244.27,VaccDscaff14-augustus-gene-124.25,VaccDscaff3-processed-gene-42.8,VaccDscaff21-augustus-gene-132.31,VaccDscaff32-augustus-gene-192.39,	0.187821293
Biological process	transmembrane transport	GO:0055085	5	0.01394272	1.95694206	13	3763	74	41918	VaccDscaff35-augustus-gene-34.47,VaccDscaff8-augustus-gene-279.41,VaccDscaff32-augustus-gene-179.26,VaccDscaff19-augustus-gene-340.29,VaccDscaff22-augustus-gene-62.24,VaccDscaff5-snap-gene-137.21,VaccDscaff36-snap-gene-54.58,VaccDscaff38-processed-gene-77.3,VaccDscaff28-augustus-gene-108.25,VaccDscaff15-augustus-gene-210.26,VaccDscaff29-processed-gene-50.15,VaccDscaff22-augustus-gene-355.22,VaccD…	0.217357047
Biological process	positive regulation of multicellular organismal process	GO:0051240	5	0.016839557	3.355802485	5	844	74	41918	VaccDscaff2-augustus-gene-198.27,VaccDscaff35-augustus-gene-34.47,VaccDscaff5-augustus-gene-293.26,VaccDscaff30-augustus-gene-326.25,VaccDscaff25-augustus-gene-212.27,	0.219416916
Biological process	positive regulation of response to stimulus	GO:0048584	5	0.019227536	2.566482988	7	1545	74	41918	VaccDscaff21-snap-gene-19.36,VaccDscaff2-augustus-gene-198.27,VaccDscaff30-augustus-gene-326.25,VaccDscaff35-augustus-gene-168.29,VaccDscaff3-processed-gene-42.8,VaccDscaff25-processed-gene-190.14,VaccDscaff25-augustus-gene-212.27,	0.233133874
Biological process	response to antibiotic	GO:0046677	4	0.023999405	2.695286881	6	1261	74	41918	VaccDscaff30-augustus-gene-326.25,VaccDscaff36-augustus-gene-33.17,VaccDscaff3-processed-gene-42.8,VaccDscaff25-processed-gene-190.14,VaccDscaff34-processed-gene-130.22,VaccDscaff1-augustus-gene-237.23,	0.24942239
Biological process	shoot system development	GO:0048367	5	0.026150214	1.925542044	11	3236	74	41918	VaccDscaff2-processed-gene-17.4,VaccDscaff2-augustus-gene-198.27,VaccDscaff5-augustus-gene-293.26,VaccDscaff30-augustus-gene-326.25,VaccDscaff32-augustus-gene-179.26,VaccDscaff3-processed-gene-42.8,VaccDscaff22-augustus-gene-62.24,VaccDscaff26-augustus-gene-75.25,VaccDscaff38-processed-gene-77.3,VaccDscaff25-augustus-gene-212.27,VaccDscaff1-augustus-gene-237.23,	0.26545508
Biological process	sulfur compound metabolic process	GO:0006790	4	0.027695285	2.944175985	5	962	74	41918	VaccDscaff37-augustus-gene-172.29,VaccDscaff14-augustus-gene-124.25,VaccDscaff3-processed-gene-42.8,VaccDscaff461-processed-gene-0.9,VaccDscaff8-augustus-gene-18.34,	0.262804168
Biological process	response to inorganic substance	GO:0010035	4	0.028393462	1.834686508	12	3705	74	41918	VaccDscaff36-snap-gene-221.42,VaccDscaff53-augustus-gene-7.27,VaccDscaff2-augustus-gene-198.27,VaccDscaff30-augustus-gene-326.25,VaccDscaff377-augustus-gene-0.29,VaccDscaff35-augustus-gene-168.29,VaccDscaff2-augustus-gene-412.32,VaccDscaff22-augustus-gene-62.24,VaccDscaff36-snap-gene-54.58,VaccDscaff25-processed-gene-190.14,VaccDscaff25-augustus-gene-212.27,VaccDscaff1-augustus-gene-237.23,	0.266532173
Biological process	regulation of response to stress	GO:0080134	5	0.029602103	2.344894273	7	1691	74	41918	VaccDscaff21-snap-gene-19.36,VaccDscaff2-augustus-gene-198.27,VaccDscaff30-augustus-gene-326.25,VaccDscaff36-augustus-gene-33.17,VaccDscaff35-augustus-gene-168.29,VaccDscaff25-processed-gene-190.14,VaccDscaff25-augustus-gene-212.27,	0.274921663
Biological process	secondary metabolite biosynthetic process	GO:0044550	4	0.031961879	2.832297297	5	1000	74	41918	VaccDscaff8-processed-gene-335.15,VaccDscaff24-snap-gene-244.27,VaccDscaff3-processed-gene-42.8,VaccDscaff21-augustus-gene-132.31,VaccDscaff32-augustus-gene-192.39,	0.2790272
Biological process	plant organ development	GO:0099402	4	0.034305009	1.783656131	12	3811	74	41918	VaccDscaff2-processed-gene-17.4,VaccDscaff2-augustus-gene-198.27,VaccDscaff5-augustus-gene-293.26,VaccDscaff30-augustus-gene-326.25,VaccDscaff32-augustus-gene-179.26,VaccDscaff3-processed-gene-42.8,VaccDscaff9-augustus-gene-115.31,VaccDscaff22-augustus-gene-62.24,VaccDscaff26-augustus-gene-75.25,VaccDscaff38-processed-gene-77.3,VaccDscaff25-augustus-gene-212.27,VaccDscaff1-augustus-gene-237.23,	0.296517556
Biological process	response to oxygen-containing compound	GO:1901700	4	0.036357798	1.543953705	18	6604	74	41918	VaccDscaff2-processed-gene-17.4,VaccDscaff53-augustus-gene-7.27,VaccDscaff37-augustus-gene-172.29,VaccDscaff2-augustus-gene-198.27,VaccDscaff30-augustus-gene-326.25,VaccDscaff377-augustus-gene-0.29,VaccDscaff36-augustus-gene-33.17,VaccDscaff32-augustus-gene-179.26,VaccDscaff35-augustus-gene-168.29,VaccDscaff3-processed-gene-42.8,VaccDscaff2-augustus-gene-412.32,VaccDscaff22-augustus-gene-62.24,Va…	0.308158816
Biological process	response to toxic substance	GO:0009636	4	0.042658837	2.615232961	5	1083	74	41918	VaccDscaff30-augustus-gene-326.25,VaccDscaff14-augustus-gene-124.25,VaccDscaff25-processed-gene-190.14,VaccDscaff32-augustus-gene-192.39,VaccDscaff1-augustus-gene-237.23,	0.315603091
