# Supplementary material for: Supplementary Low Far-Red Light Promotes Proliferation and Photosynthetic Capacity of Blueberry In Vitro Plantlets
Source: Int J Mol Sci. 2024 Jan 5;25(2):688. doi: 10.3390/ijms25020688 (PMC10815622; doi:10.3390/ijms25020688)
Supplement: Supplementary file 1 [file ijms-25-00688-s001.zip › Supplementary Materials/Table S7 stem_brown_go_predictions.xlsx]

## Sheet: Sheet1
plant organ senescence GO:0090693	gene predictions	positive regulation of developmental process GO:0051094	gene predictions	positive regulation of response to stimulus GO:0048584	gene predictions	shoot system development GO:0048367	gene predictions	plant organ development GO:0099402	gene predictions
VaccDscaff2-processed-gene-17.4	TZF3	VaccDscaff2-augustus-gene-198.27	ANAC2	VaccDscaff21-snap-gene-19.36	BEN1	VaccDscaff2-processed-gene-17.4	TZF3	VaccDscaff2-processed-gene-17.4	TZF3
VaccDscaff2-augustus-gene-198.27	ANAC2	VaccDscaff35-augustus-gene-34.47	ELIP1	VaccDscaff2-augustus-gene-198.27	ANAC2	VaccDscaff2-augustus-gene-198.27	ANAC2	VaccDscaff2-augustus-gene-198.27	ANAC2
VaccDscaff5-augustus-gene-293.26	NAC100	VaccDscaff5-augustus-gene-293.26	NAC100	VaccDscaff30-augustus-gene-326.25	NAC100	VaccDscaff5-augustus-gene-293.26	NAC100	VaccDscaff5-augustus-gene-293.26	NAC100
VaccDscaff30-augustus-gene-326.25	NAC100	VaccDscaff30-augustus-gene-326.25	NAC100	VaccDscaff35-augustus-gene-168.29	LDAP1	VaccDscaff30-augustus-gene-326.25	NAC100	VaccDscaff30-augustus-gene-326.25	NAC100
VaccDscaff3-processed-gene-42.8	MKK7	VaccDscaff25-augustus-gene-212.27	ANAC2	VaccDscaff3-processed-gene-42.8	MKK7	VaccDscaff32-augustus-gene-179.26	COF1	VaccDscaff32-augustus-gene-179.26	COF1
VaccDscaff22-augustus-gene-62.24	NRT1.5			VaccDscaff25-processed-gene-190.14	ADH1	VaccDscaff3-processed-gene-42.8	MKK7	VaccDscaff3-processed-gene-42.8	MKK7
VaccDscaff26-augustus-gene-75.25	NEET			VaccDscaff25-augustus-gene-212.27	ANAC2	VaccDscaff22-augustus-gene-62.24	NRT1.5	VaccDscaff9-augustus-gene-115.31	SCN1
VaccDscaff25-augustus-gene-212.27	ANAC2					VaccDscaff26-augustus-gene-75.25	NEET	VaccDscaff22-augustus-gene-62.24	NRT1.5
						VaccDscaff38-processed-gene-77.3	COF1	VaccDscaff26-augustus-gene-75.25	NEET
						VaccDscaff25-augustus-gene-212.27	ANAC2	VaccDscaff38-processed-gene-77.3	COF1
						VaccDscaff1-augustus-gene-237.23	FER1	VaccDscaff25-augustus-gene-212.27	ANAC2
								VaccDscaff1-augustus-gene-237.23	FER1
