# Supplementary material for: Supplementary Low Far-Red Light Promotes Proliferation and Photosynthetic Capacity of Blueberry In Vitro Plantlets
Source: Int J Mol Sci. 2024 Jan 5;25(2):688. doi: 10.3390/ijms25020688 (PMC10815622; doi:10.3390/ijms25020688)
Supplement: Supplementary file 1 [file ijms-25-00688-s001.zip › Supplementary Materials/Table S8 leaf_magenta_GO.xls]

Class	GO_Name	GO_ID	GO_Level	P_value	EnrichmentScore	HitsGenesCountsInSelectedSet	HitsGenesCountsInBackground	AllGenesCountsInSelectedSet	AllGenesCountsInBackground	GenesOfSelectedSetInGOterm	corrected p-value(BH method)
Molecular function	iron ion binding	GO:0005506	7	9.85E-12	44.77341202	8	137	47	36037	VaccDscaff27-snap-gene-15.41,VaccDscaff26-processed-gene-123.26,VaccDscaff27-augustus-gene-15.34,VaccDscaff33-augustus-gene-216.27,VaccDscaff34-snap-gene-278.41,VaccDscaff5-augustus-gene-192.33,VaccDscaff1-augustus-gene-237.23,VaccDscaff29-augustus-gene-121.23,	1.62E-09
Molecular function	transition metal ion binding	GO:0046914	6	5.85E-07	6.589212101	11	1280	47	36037	VaccDscaff16-augustus-gene-177.42,VaccDscaff27-snap-gene-15.41,VaccDscaff34-processed-gene-130.22,VaccDscaff26-processed-gene-123.26,VaccDscaff27-augustus-gene-15.34,VaccDscaff33-augustus-gene-216.27,VaccDscaff34-snap-gene-278.41,VaccDscaff2-snap-gene-317.38,VaccDscaff5-augustus-gene-192.33,VaccDscaff1-augustus-gene-237.23,VaccDscaff29-augustus-gene-121.23,	1.61E-05
Molecular function	metal ion binding	GO:0046872	5	6.89E-07	5.188797944	13	1921	47	36037	VaccDscaff16-augustus-gene-177.42,VaccDscaff27-snap-gene-15.41,VaccDscaff9-augustus-gene-132.34,VaccDscaff34-processed-gene-130.22,VaccDscaff26-processed-gene-123.26,VaccDscaff27-augustus-gene-15.34,VaccDscaff33-augustus-gene-216.27,VaccDscaff34-snap-gene-278.41,VaccDscaff2-snap-gene-317.38,VaccDscaff5-augustus-gene-192.33,VaccDscaff1-augustus-gene-237.23,VaccDscaff32-processed-gene-217.2,VaccDsc…	1.62E-05
Molecular function	cation binding	GO:0043169	4	1.35E-06	4.888514395	13	2039	47	36037	VaccDscaff16-augustus-gene-177.42,VaccDscaff27-snap-gene-15.41,VaccDscaff9-augustus-gene-132.34,VaccDscaff34-processed-gene-130.22,VaccDscaff26-processed-gene-123.26,VaccDscaff27-augustus-gene-15.34,VaccDscaff33-augustus-gene-216.27,VaccDscaff34-snap-gene-278.41,VaccDscaff2-snap-gene-317.38,VaccDscaff5-augustus-gene-192.33,VaccDscaff1-augustus-gene-237.23,VaccDscaff32-processed-gene-217.2,VaccDsc…	2.78E-05
Molecular function	protein domain specific binding	GO:0019904	4	2.51E-05	14.412494	5	266	47	36037	VaccDscaff27-snap-gene-15.41,VaccDscaff27-augustus-gene-15.34,VaccDscaff34-snap-gene-278.41,VaccDscaff5-augustus-gene-192.33,VaccDscaff1-augustus-gene-237.23,	4.61E-04
Molecular function	ion binding	GO:0043167	3	5.03E-05	3.266715013	14	3286	47	36037	VaccDscaff16-augustus-gene-177.42,VaccDscaff27-snap-gene-15.41,VaccDscaff9-augustus-gene-132.34,VaccDscaff14-processed-gene-314.0,VaccDscaff34-processed-gene-130.22,VaccDscaff26-processed-gene-123.26,VaccDscaff27-augustus-gene-15.34,VaccDscaff33-augustus-gene-216.27,VaccDscaff34-snap-gene-278.41,VaccDscaff2-snap-gene-317.38,VaccDscaff5-augustus-gene-192.33,VaccDscaff1-augustus-gene-237.23,VaccDsc…	8.29E-04
Molecular function	S-adenosylmethionine-dependent methyltransferase activity	GO:0008757	2	6.49E-04	7.165838139	5	535	47	36037	VaccDscaff9-augustus-gene-306.24,VaccDscaff23-snap-gene-74.33,VaccDscaff36-augustus-gene-115.21,VaccDscaff36-augustus-gene-115.22,VaccDscaff30-processed-gene-58.9,	0.008927804
Molecular function	methyltransferase activity	GO:0008168	0	0.001441318	5.990192819	5	640	47	36037	VaccDscaff9-augustus-gene-306.24,VaccDscaff23-snap-gene-74.33,VaccDscaff36-augustus-gene-115.21,VaccDscaff36-augustus-gene-115.22,VaccDscaff30-processed-gene-58.9,	0.018293658
Molecular function	null	GO:0016741	4	0.001927925	5.604858778	5	684	47	36037	VaccDscaff9-augustus-gene-306.24,VaccDscaff23-snap-gene-74.33,VaccDscaff36-augustus-gene-115.21,VaccDscaff36-augustus-gene-115.22,VaccDscaff30-processed-gene-58.9,	0.021207178
Cellular component	chloroplast stroma	GO:0009570	4	8.77E-07	4.714191259	14	2340	53	41761	VaccDscaff16-augustus-gene-177.42,VaccDscaff27-snap-gene-15.41,VaccDscaff10-augustus-gene-139.26,VaccDscaff26-processed-gene-123.26,VaccDscaff37-augustus-gene-173.13,VaccDscaff27-augustus-gene-15.34,VaccDscaff1-augustus-gene-291.25,VaccDscaff33-augustus-gene-216.27,VaccDscaff5-augustus-gene-270.20,VaccDscaff34-snap-gene-278.41,VaccDscaff26-augustus-gene-359.36,VaccDscaff5-augustus-gene-192.33,Vac…	5.83E-05
Cellular component	plastid stroma	GO:0009532	3	1.01E-06	4.660417215	14	2367	53	41761	VaccDscaff16-augustus-gene-177.42,VaccDscaff27-snap-gene-15.41,VaccDscaff10-augustus-gene-139.26,VaccDscaff26-processed-gene-123.26,VaccDscaff37-augustus-gene-173.13,VaccDscaff27-augustus-gene-15.34,VaccDscaff1-augustus-gene-291.25,VaccDscaff33-augustus-gene-216.27,VaccDscaff5-augustus-gene-270.20,VaccDscaff34-snap-gene-278.41,VaccDscaff26-augustus-gene-359.36,VaccDscaff5-augustus-gene-192.33,Vac…	4.46E-05
Cellular component	plastid envelope	GO:0009526	5	3.62E-05	3.949590959	12	2394	53	41761	VaccDscaff27-snap-gene-15.41,VaccDscaff10-augustus-gene-139.26,VaccDscaff26-processed-gene-123.26,VaccDscaff27-augustus-gene-15.34,VaccDscaff1-augustus-gene-291.25,VaccDscaff35-snap-gene-33.12,VaccDscaff33-augustus-gene-216.27,VaccDscaff5-augustus-gene-270.20,VaccDscaff34-snap-gene-278.41,VaccDscaff5-augustus-gene-192.33,VaccDscaff1-augustus-gene-237.23,VaccDscaff29-augustus-gene-121.23,	0.001202963
Cellular component	plastid membrane	GO:0042170	5	3.81E-05	5.384579017	9	1317	53	41761	VaccDscaff27-snap-gene-15.41,VaccDscaff10-augustus-gene-139.26,VaccDscaff27-augustus-gene-15.34,VaccDscaff1-augustus-gene-291.25,VaccDscaff35-snap-gene-33.12,VaccDscaff5-augustus-gene-270.20,VaccDscaff34-snap-gene-278.41,VaccDscaff5-augustus-gene-192.33,VaccDscaff1-augustus-gene-237.23,	0.00101437
Cellular component	obsolete chloroplast part	GO:0044434	0	6.62E-05	3.04538803	15	3881	53	41761	VaccDscaff16-augustus-gene-177.42,VaccDscaff27-snap-gene-15.41,VaccDscaff10-augustus-gene-139.26,VaccDscaff26-processed-gene-123.26,VaccDscaff37-augustus-gene-173.13,VaccDscaff27-augustus-gene-15.34,VaccDscaff1-augustus-gene-291.25,VaccDscaff35-snap-gene-33.12,VaccDscaff33-augustus-gene-216.27,VaccDscaff5-augustus-gene-270.20,VaccDscaff34-snap-gene-278.41,VaccDscaff26-augustus-gene-359.36,VaccDsc…	0.001466509
Cellular component	obsolete plastid part	GO:0044435	0	8.05E-05	2.993705913	15	3948	53	41761	VaccDscaff16-augustus-gene-177.42,VaccDscaff27-snap-gene-15.41,VaccDscaff10-augustus-gene-139.26,VaccDscaff26-processed-gene-123.26,VaccDscaff37-augustus-gene-173.13,VaccDscaff27-augustus-gene-15.34,VaccDscaff1-augustus-gene-291.25,VaccDscaff35-snap-gene-33.12,VaccDscaff33-augustus-gene-216.27,VaccDscaff5-augustus-gene-270.20,VaccDscaff34-snap-gene-278.41,VaccDscaff26-augustus-gene-359.36,VaccDsc…	0.001528676
Cellular component	mitochondrion	GO:0005739	6	9.69E-05	3.116160324	14	3540	53	41761	VaccDscaff27-snap-gene-15.41,VaccDscaff10-augustus-gene-139.26,VaccDscaff6-augustus-gene-154.23,VaccDscaff26-processed-gene-123.26,VaccDscaff13-augustus-gene-69.34,VaccDscaff27-augustus-gene-15.34,VaccDscaff1-augustus-gene-291.25,VaccDscaff33-augustus-gene-216.27,VaccDscaff5-augustus-gene-270.20,VaccDscaff29-augustus-gene-44.30,VaccDscaff34-snap-gene-278.41,VaccDscaff5-augustus-gene-192.33,VaccDs…	0.001611479
Cellular component	chloroplast	GO:0009507	7	3.38E-04	2.244179962	19	6671	53	41761	VaccDscaff16-augustus-gene-177.42,VaccDscaff27-snap-gene-15.41,VaccDscaff9-augustus-gene-132.34,VaccDscaff10-augustus-gene-139.26,VaccDscaff26-processed-gene-123.26,VaccDscaff37-augustus-gene-173.13,VaccDscaff13-augustus-gene-69.34,VaccDscaff27-augustus-gene-15.34,VaccDscaff1-augustus-gene-291.25,VaccDscaff35-snap-gene-33.12,VaccDscaff9-processed-gene-169.15,VaccDscaff33-augustus-gene-216.27,Vacc…	0.005001754
Cellular component	thylakoid	GO:0009579	6	4.68E-04	4.332334825	8	1455	53	41761	VaccDscaff27-snap-gene-15.41,VaccDscaff37-augustus-gene-173.13,VaccDscaff13-augustus-gene-69.34,VaccDscaff27-augustus-gene-15.34,VaccDscaff35-snap-gene-33.12,VaccDscaff34-snap-gene-278.41,VaccDscaff5-augustus-gene-192.33,VaccDscaff1-augustus-gene-237.23,	0.006225188
Cellular component	plastid	GO:0009536	6	5.87E-04	2.150685897	19	6961	53	41761	VaccDscaff16-augustus-gene-177.42,VaccDscaff27-snap-gene-15.41,VaccDscaff9-augustus-gene-132.34,VaccDscaff10-augustus-gene-139.26,VaccDscaff26-processed-gene-123.26,VaccDscaff37-augustus-gene-173.13,VaccDscaff13-augustus-gene-69.34,VaccDscaff27-augustus-gene-15.34,VaccDscaff1-augustus-gene-291.25,VaccDscaff35-snap-gene-33.12,VaccDscaff9-processed-gene-169.15,VaccDscaff33-augustus-gene-216.27,Vacc…	0.007094724
Cellular component	chloroplast thylakoid membrane	GO:0009535	7	8.55E-04	5.366243334	6	881	53	41761	VaccDscaff27-snap-gene-15.41,VaccDscaff27-augustus-gene-15.34,VaccDscaff35-snap-gene-33.12,VaccDscaff34-snap-gene-278.41,VaccDscaff5-augustus-gene-192.33,VaccDscaff1-augustus-gene-237.23,	0.00948139
Cellular component	plastid thylakoid membrane	GO:0055035	6	9.50E-04	5.258799085	6	899	53	41761	VaccDscaff27-snap-gene-15.41,VaccDscaff27-augustus-gene-15.34,VaccDscaff35-snap-gene-33.12,VaccDscaff34-snap-gene-278.41,VaccDscaff5-augustus-gene-192.33,VaccDscaff1-augustus-gene-237.23,	0.009714621
Cellular component	thylakoid membrane	GO:0042651	5	0.001219838	5.008114807	6	944	53	41761	VaccDscaff27-snap-gene-15.41,VaccDscaff27-augustus-gene-15.34,VaccDscaff35-snap-gene-33.12,VaccDscaff34-snap-gene-278.41,VaccDscaff5-augustus-gene-192.33,VaccDscaff1-augustus-gene-237.23,	0.010815896
Cellular component	photosynthetic membrane	GO:0034357	4	0.001246451	4.98698352	6	948	53	41761	VaccDscaff27-snap-gene-15.41,VaccDscaff27-augustus-gene-15.34,VaccDscaff35-snap-gene-33.12,VaccDscaff34-snap-gene-278.41,VaccDscaff5-augustus-gene-192.33,VaccDscaff1-augustus-gene-237.23,	0.009751648
Cellular component	organelle membrane	GO:0031090	4	0.00151641	2.195592884	16	5742	53	41761	VaccDscaff27-snap-gene-15.41,VaccDscaff11-processed-gene-20.10,VaccDscaff10-augustus-gene-139.26,VaccDscaff9-augustus-gene-15.29,VaccDscaff37-augustus-gene-173.13,VaccDscaff27-augustus-gene-15.34,VaccDscaff1-augustus-gene-291.25,VaccDscaff35-snap-gene-33.12,VaccDscaff22-augustus-gene-86.29,VaccDscaff9-processed-gene-169.15,VaccDscaff44-augustus-gene-227.23,VaccDscaff5-augustus-gene-270.20,VaccDsc…	0.011204582
Cellular component	organelle envelope	GO:0031967	4	0.001787743	2.583420971	12	3660	53	41761	VaccDscaff27-snap-gene-15.41,VaccDscaff10-augustus-gene-139.26,VaccDscaff26-processed-gene-123.26,VaccDscaff27-augustus-gene-15.34,VaccDscaff1-augustus-gene-291.25,VaccDscaff35-snap-gene-33.12,VaccDscaff33-augustus-gene-216.27,VaccDscaff5-augustus-gene-270.20,VaccDscaff34-snap-gene-278.41,VaccDscaff5-augustus-gene-192.33,VaccDscaff1-augustus-gene-237.23,VaccDscaff29-augustus-gene-121.23,	0.0125142
Cellular component	envelope	GO:0031975	3	0.001846727	2.573576689	12	3674	53	41761	VaccDscaff27-snap-gene-15.41,VaccDscaff10-augustus-gene-139.26,VaccDscaff26-processed-gene-123.26,VaccDscaff27-augustus-gene-15.34,VaccDscaff1-augustus-gene-291.25,VaccDscaff35-snap-gene-33.12,VaccDscaff33-augustus-gene-216.27,VaccDscaff5-augustus-gene-270.20,VaccDscaff34-snap-gene-278.41,VaccDscaff5-augustus-gene-192.33,VaccDscaff1-augustus-gene-237.23,VaccDscaff29-augustus-gene-121.23,	0.012280738
Cellular component	chloroplast envelope	GO:0009941	6	0.001909621	3.482622746	8	1810	53	41761	VaccDscaff27-snap-gene-15.41,VaccDscaff10-augustus-gene-139.26,VaccDscaff26-processed-gene-123.26,VaccDscaff1-augustus-gene-291.25,VaccDscaff33-augustus-gene-216.27,VaccDscaff5-augustus-gene-270.20,VaccDscaff34-snap-gene-278.41,VaccDscaff29-augustus-gene-121.23,	0.012094269
Cellular component	obsolete thylakoid part	GO:0044436	0	0.002149437	4.476951115	6	1056	53	41761	VaccDscaff27-snap-gene-15.41,VaccDscaff27-augustus-gene-15.34,VaccDscaff35-snap-gene-33.12,VaccDscaff34-snap-gene-278.41,VaccDscaff5-augustus-gene-192.33,VaccDscaff1-augustus-gene-237.23,	0.012994324
Cellular component	obsolete cytoplasmic part	GO:0044444	0	0.002513251	1.367166101	39	22477	53	41761	VaccDscaff16-augustus-gene-177.42,VaccDscaff27-snap-gene-15.41,VaccDscaff9-augustus-gene-132.34,VaccDscaff3-processed-gene-32.5,VaccDscaff11-processed-gene-20.10,VaccDscaff10-augustus-gene-139.26,VaccDscaff14-processed-gene-314.0,VaccDscaff5-augustus-gene-43.29,VaccDscaff6-augustus-gene-154.23,VaccDscaff9-augustus-gene-15.29,VaccDscaff14-augustus-gene-370.56,VaccDscaff46-snap-gene-71.28,VaccDscaf…	0.014533147
Cellular component	chloroplast thylakoid	GO:0009534	8	0.00319574	4.13257026	6	1144	53	41761	VaccDscaff27-snap-gene-15.41,VaccDscaff27-augustus-gene-15.34,VaccDscaff35-snap-gene-33.12,VaccDscaff34-snap-gene-278.41,VaccDscaff5-augustus-gene-192.33,VaccDscaff1-augustus-gene-237.23,	0.017709723
Cellular component	plastid thylakoid	GO:0031976	7	0.003292875	4.107437339	6	1151	53	41761	VaccDscaff27-snap-gene-15.41,VaccDscaff27-augustus-gene-15.34,VaccDscaff35-snap-gene-33.12,VaccDscaff34-snap-gene-278.41,VaccDscaff5-augustus-gene-192.33,VaccDscaff1-augustus-gene-237.23,	0.017518096
Cellular component	organelle outer membrane	GO:0031968	6	0.00378091	3.9929564	6	1184	53	41761	VaccDscaff27-snap-gene-15.41,VaccDscaff27-augustus-gene-15.34,VaccDscaff35-snap-gene-33.12,VaccDscaff34-snap-gene-278.41,VaccDscaff5-augustus-gene-192.33,VaccDscaff1-augustus-gene-237.23,	0.019340811
Cellular component	outer membrane	GO:0019867	4	0.003906941	3.966158035	6	1192	53	41761	VaccDscaff27-snap-gene-15.41,VaccDscaff27-augustus-gene-15.34,VaccDscaff35-snap-gene-33.12,VaccDscaff34-snap-gene-278.41,VaccDscaff5-augustus-gene-192.33,VaccDscaff1-augustus-gene-237.23,	0.019245301
Cellular component	membrane	GO:0016020	3	0.006728284	1.455112458	30	16245	53	41761	VaccDscaff27-snap-gene-15.41,VaccDscaff3-processed-gene-32.5,VaccDscaff11-processed-gene-20.10,VaccDscaff10-augustus-gene-139.26,VaccDscaff5-augustus-gene-43.29,VaccDscaff6-augustus-gene-154.23,VaccDscaff9-augustus-gene-15.29,VaccDscaff14-augustus-gene-370.56,VaccDscaff15-augustus-gene-210.26,VaccDscaff31-processed-gene-29.14,VaccDscaff23-snap-gene-74.33,VaccDscaff39-snap-gene-44.38,VaccDscaff26-…	0.030857302
Cellular component	cytoplasm	GO:0005737	3	0.0075809	1.263597657	42	26190	53	41761	VaccDscaff16-augustus-gene-177.42,VaccDscaff27-snap-gene-15.41,VaccDscaff9-augustus-gene-132.34,VaccDscaff3-processed-gene-32.5,VaccDscaff11-processed-gene-20.10,VaccDscaff10-augustus-gene-139.26,VaccDscaff14-processed-gene-314.0,VaccDscaff5-augustus-gene-43.29,VaccDscaff6-augustus-gene-154.23,VaccDscaff9-augustus-gene-15.29,VaccDscaff14-augustus-gene-370.56,VaccDscaff46-snap-gene-71.28,VaccDscaf…	0.033608655
Cellular component	organelle subcompartment	GO:0031984	3	0.010798128	2.27795142	10	3459	53	41761	VaccDscaff27-snap-gene-15.41,VaccDscaff11-processed-gene-20.10,VaccDscaff5-augustus-gene-43.29,VaccDscaff27-augustus-gene-15.34,VaccDscaff35-snap-gene-33.12,VaccDscaff44-augustus-gene-227.23,VaccDscaff34-snap-gene-278.41,VaccDscaff5-augustus-gene-192.33,VaccDscaff1-augustus-gene-237.23,VaccDscaff29-augustus-gene-16.15,	0.042239737
Cellular component	cell junction	GO:0030054	3	0.011823618	2.38610046	9	2972	53	41761	VaccDscaff3-processed-gene-32.5,VaccDscaff6-augustus-gene-154.23,VaccDscaff1437-augustus-gene-0.6,VaccDscaff23-snap-gene-74.33,VaccDscaff34-processed-gene-130.22,VaccDscaff22-augustus-gene-86.29,VaccDscaff86-augustus-gene-5.56,VaccDscaff22-processed-gene-12.3,VaccDscaff60-augustus-gene-3.27,	0.044929747
Cellular component	endoplasmic reticulum	GO:0005783	6	0.013115184	2.345845374	9	3023	53	41761	VaccDscaff11-processed-gene-20.10,VaccDscaff9-augustus-gene-15.29,VaccDscaff14-augustus-gene-370.56,VaccDscaff34-processed-gene-130.22,VaccDscaff37-augustus-gene-173.13,VaccDscaff9-processed-gene-169.15,VaccDscaff44-augustus-gene-227.23,VaccDscaff43-augustus-gene-6.36,VaccDscaff29-augustus-gene-16.15,	0.048453319
Cellular component	bounding membrane of organelle	GO:0098588	5	0.020355135	2.065382428	10	3815	53	41761	VaccDscaff27-snap-gene-15.41,VaccDscaff9-augustus-gene-15.29,VaccDscaff37-augustus-gene-173.13,VaccDscaff27-augustus-gene-15.34,VaccDscaff35-snap-gene-33.12,VaccDscaff22-augustus-gene-86.29,VaccDscaff9-processed-gene-169.15,VaccDscaff34-snap-gene-278.41,VaccDscaff5-augustus-gene-192.33,VaccDscaff1-augustus-gene-237.23,	0.067680825
Cellular component	symplast	GO:0055044	3	0.026560435	2.209445205	8	2853	53	41761	VaccDscaff3-processed-gene-32.5,VaccDscaff1437-augustus-gene-0.6,VaccDscaff23-snap-gene-74.33,VaccDscaff34-processed-gene-130.22,VaccDscaff22-augustus-gene-86.29,VaccDscaff86-augustus-gene-5.56,VaccDscaff22-processed-gene-12.3,VaccDscaff60-augustus-gene-3.27,	0.082152044
Cellular component	plasmodesma	GO:0009506	6	0.026560435	2.209445205	8	2853	53	41761	VaccDscaff3-processed-gene-32.5,VaccDscaff1437-augustus-gene-0.6,VaccDscaff23-snap-gene-74.33,VaccDscaff34-processed-gene-130.22,VaccDscaff22-augustus-gene-86.29,VaccDscaff86-augustus-gene-5.56,VaccDscaff22-processed-gene-12.3,VaccDscaff60-augustus-gene-3.27,	0.082152044
Cellular component	obsolete endoplasmic reticulum part	GO:0044432	0	0.028200016	2.911838124	5	1353	53	41761	VaccDscaff11-processed-gene-20.10,VaccDscaff37-augustus-gene-173.13,VaccDscaff44-augustus-gene-227.23,VaccDscaff43-augustus-gene-6.36,VaccDscaff29-augustus-gene-16.15,	0.083346715
Cellular component	anchoring junction	GO:0070161	4	0.028407917	2.18115819	8	2890	53	41761	VaccDscaff3-processed-gene-32.5,VaccDscaff1437-augustus-gene-0.6,VaccDscaff23-snap-gene-74.33,VaccDscaff34-processed-gene-130.22,VaccDscaff22-augustus-gene-86.29,VaccDscaff86-augustus-gene-5.56,VaccDscaff22-processed-gene-12.3,VaccDscaff60-augustus-gene-3.27,	0.082135933
Cellular component	cell-cell junction	GO:0005911	5	0.028407917	2.18115819	8	2890	53	41761	VaccDscaff3-processed-gene-32.5,VaccDscaff1437-augustus-gene-0.6,VaccDscaff23-snap-gene-74.33,VaccDscaff34-processed-gene-130.22,VaccDscaff22-augustus-gene-86.29,VaccDscaff86-augustus-gene-5.56,VaccDscaff22-processed-gene-12.3,VaccDscaff60-augustus-gene-3.27,	0.082135933
Biological process	intracellular sequestering of iron ion	GO:0006880	6	2.22E-16	155.9739535	8	43	50	41918	VaccDscaff27-snap-gene-15.41,VaccDscaff26-processed-gene-123.26,VaccDscaff27-augustus-gene-15.34,VaccDscaff33-augustus-gene-216.27,VaccDscaff34-snap-gene-278.41,VaccDscaff5-augustus-gene-192.33,VaccDscaff1-augustus-gene-237.23,VaccDscaff29-augustus-gene-121.23,	1.86E-13
Biological process	sequestering of iron ion	GO:0097577	5	2.22E-16	155.9739535	8	43	50	41918	VaccDscaff27-snap-gene-15.41,VaccDscaff26-processed-gene-123.26,VaccDscaff27-augustus-gene-15.34,VaccDscaff33-augustus-gene-216.27,VaccDscaff34-snap-gene-278.41,VaccDscaff5-augustus-gene-192.33,VaccDscaff1-augustus-gene-237.23,VaccDscaff29-augustus-gene-121.23,	1.86E-13
Biological process	iron ion transport	GO:0006826	9	1.08E-14	67.97513514	9	111	50	41918	VaccDscaff27-snap-gene-15.41,VaccDscaff26-processed-gene-123.26,VaccDscaff27-augustus-gene-15.34,VaccDscaff86-augustus-gene-5.56,VaccDscaff33-augustus-gene-216.27,VaccDscaff34-snap-gene-278.41,VaccDscaff5-augustus-gene-192.33,VaccDscaff1-augustus-gene-237.23,VaccDscaff29-augustus-gene-121.23,	3.01E-12
Biological process	sequestering of metal ion	GO:0051238	4	2.90E-14	91.87506849	8	73	50	41918	VaccDscaff27-snap-gene-15.41,VaccDscaff26-processed-gene-123.26,VaccDscaff27-augustus-gene-15.34,VaccDscaff33-augustus-gene-216.27,VaccDscaff34-snap-gene-278.41,VaccDscaff5-augustus-gene-192.33,VaccDscaff1-augustus-gene-237.23,VaccDscaff29-augustus-gene-121.23,	6.07E-12
Biological process	obsolete iron ion homeostasis	GO:0055072	0	1.15E-13	52.3975	9	144	50	41918	VaccDscaff27-snap-gene-15.41,VaccDscaff26-processed-gene-123.26,VaccDscaff27-augustus-gene-15.34,VaccDscaff86-augustus-gene-5.56,VaccDscaff33-augustus-gene-216.27,VaccDscaff34-snap-gene-278.41,VaccDscaff5-augustus-gene-192.33,VaccDscaff1-augustus-gene-237.23,VaccDscaff29-augustus-gene-121.23,	1.93E-11
Biological process	intracellular iron ion homeostasis	GO:0006879	7	9.15E-13	60.42234234	8	111	50	41918	VaccDscaff27-snap-gene-15.41,VaccDscaff26-processed-gene-123.26,VaccDscaff27-augustus-gene-15.34,VaccDscaff33-augustus-gene-216.27,VaccDscaff34-snap-gene-278.41,VaccDscaff5-augustus-gene-192.33,VaccDscaff1-augustus-gene-237.23,VaccDscaff29-augustus-gene-121.23,	1.28E-10
Biological process	transition metal ion transport	GO:0000041	8	1.10E-12	30.26570397	10	277	50	41918	VaccDscaff27-snap-gene-15.41,VaccDscaff26-processed-gene-123.26,VaccDscaff27-augustus-gene-15.34,VaccDscaff86-augustus-gene-5.56,VaccDscaff33-augustus-gene-216.27,VaccDscaff34-snap-gene-278.41,VaccDscaff5-augustus-gene-192.33,VaccDscaff1-augustus-gene-237.23,VaccDscaff29-augustus-gene-121.23,VaccDscaff6-augustus-gene-2.40,	1.31E-10
Biological process	obsolete transition metal ion homeostasis	GO:0055076	0	5.84E-12	25.5597561	10	328	50	41918	VaccDscaff16-augustus-gene-177.42,VaccDscaff27-snap-gene-15.41,VaccDscaff26-processed-gene-123.26,VaccDscaff27-augustus-gene-15.34,VaccDscaff86-augustus-gene-5.56,VaccDscaff33-augustus-gene-216.27,VaccDscaff34-snap-gene-278.41,VaccDscaff5-augustus-gene-192.33,VaccDscaff1-augustus-gene-237.23,VaccDscaff29-augustus-gene-121.23,	6.12E-10
Biological process	obsolete intracellular transition metal ion homeostasis	GO:0046916	0	6.26E-12	33.68410714	9	224	50	41918	VaccDscaff16-augustus-gene-177.42,VaccDscaff27-snap-gene-15.41,VaccDscaff26-processed-gene-123.26,VaccDscaff27-augustus-gene-15.34,VaccDscaff33-augustus-gene-216.27,VaccDscaff34-snap-gene-278.41,VaccDscaff5-augustus-gene-192.33,VaccDscaff1-augustus-gene-237.23,VaccDscaff29-augustus-gene-121.23,	5.83E-10
Biological process	intracellular monoatomic cation homeostasis	GO:0030003	6	1.22E-10	15.16769737	11	608	50	41918	VaccDscaff16-augustus-gene-177.42,VaccDscaff27-snap-gene-15.41,VaccDscaff15-augustus-gene-210.26,VaccDscaff26-processed-gene-123.26,VaccDscaff27-augustus-gene-15.34,VaccDscaff86-augustus-gene-5.56,VaccDscaff33-augustus-gene-216.27,VaccDscaff34-snap-gene-278.41,VaccDscaff5-augustus-gene-192.33,VaccDscaff1-augustus-gene-237.23,VaccDscaff29-augustus-gene-121.23,	1.03E-08
Biological process	intracellular monoatomic ion homeostasis	GO:0006873	5	1.94E-10	14.52277165	11	635	50	41918	VaccDscaff16-augustus-gene-177.42,VaccDscaff27-snap-gene-15.41,VaccDscaff15-augustus-gene-210.26,VaccDscaff26-processed-gene-123.26,VaccDscaff27-augustus-gene-15.34,VaccDscaff86-augustus-gene-5.56,VaccDscaff33-augustus-gene-216.27,VaccDscaff34-snap-gene-278.41,VaccDscaff5-augustus-gene-192.33,VaccDscaff1-augustus-gene-237.23,VaccDscaff29-augustus-gene-121.23,	1.47E-08
Biological process	photosynthesis	GO:0015979	4	2.41E-10	17.46583333	10	480	50	41918	VaccDscaff27-snap-gene-15.41,VaccDscaff26-processed-gene-123.26,VaccDscaff37-augustus-gene-173.13,VaccDscaff27-augustus-gene-15.34,VaccDscaff33-augustus-gene-216.27,VaccDscaff29-augustus-gene-44.30,VaccDscaff34-snap-gene-278.41,VaccDscaff5-augustus-gene-192.33,VaccDscaff1-augustus-gene-237.23,VaccDscaff29-augustus-gene-121.23,	1.68E-08
Biological process	obsolete intracellular metal ion homeostasis	GO:0006875	0	3.86E-10	16.63412698	10	504	50	41918	VaccDscaff16-augustus-gene-177.42,VaccDscaff27-snap-gene-15.41,VaccDscaff26-processed-gene-123.26,VaccDscaff27-augustus-gene-15.34,VaccDscaff86-augustus-gene-5.56,VaccDscaff33-augustus-gene-216.27,VaccDscaff34-snap-gene-278.41,VaccDscaff5-augustus-gene-192.33,VaccDscaff1-augustus-gene-237.23,VaccDscaff29-augustus-gene-121.23,	2.49E-08
Biological process	response to iron ion	GO:0010039	6	9.23E-10	25.50144487	8	263	50	41918	VaccDscaff27-snap-gene-15.41,VaccDscaff26-processed-gene-123.26,VaccDscaff27-augustus-gene-15.34,VaccDscaff33-augustus-gene-216.27,VaccDscaff34-snap-gene-278.41,VaccDscaff5-augustus-gene-192.33,VaccDscaff1-augustus-gene-237.23,VaccDscaff29-augustus-gene-121.23,	5.52E-08
Biological process	intracellular chemical homeostasis	GO:0055082	4	1.40E-09	12.02341591	11	767	50	41918	VaccDscaff16-augustus-gene-177.42,VaccDscaff27-snap-gene-15.41,VaccDscaff15-augustus-gene-210.26,VaccDscaff26-processed-gene-123.26,VaccDscaff27-augustus-gene-15.34,VaccDscaff86-augustus-gene-5.56,VaccDscaff33-augustus-gene-216.27,VaccDscaff34-snap-gene-278.41,VaccDscaff5-augustus-gene-192.33,VaccDscaff1-augustus-gene-237.23,VaccDscaff29-augustus-gene-121.23,	7.82E-08
Biological process	maintenance of location in cell	GO:0051651	4	1.99E-09	23.12717241	8	290	50	41918	VaccDscaff27-snap-gene-15.41,VaccDscaff26-processed-gene-123.26,VaccDscaff27-augustus-gene-15.34,VaccDscaff33-augustus-gene-216.27,VaccDscaff34-snap-gene-278.41,VaccDscaff5-augustus-gene-192.33,VaccDscaff1-augustus-gene-237.23,VaccDscaff29-augustus-gene-121.23,	1.04E-07
Biological process	monoatomic cation homeostasis	GO:0055080	5	6.92E-09	10.30386592	11	895	50	41918	VaccDscaff16-augustus-gene-177.42,VaccDscaff27-snap-gene-15.41,VaccDscaff15-augustus-gene-210.26,VaccDscaff26-processed-gene-123.26,VaccDscaff27-augustus-gene-15.34,VaccDscaff86-augustus-gene-5.56,VaccDscaff33-augustus-gene-216.27,VaccDscaff34-snap-gene-278.41,VaccDscaff5-augustus-gene-192.33,VaccDscaff1-augustus-gene-237.23,VaccDscaff29-augustus-gene-121.23,	3.41E-07
Biological process	cellular homeostasis	GO:0019725	3	9.92E-09	9.948176915	11	927	50	41918	VaccDscaff16-augustus-gene-177.42,VaccDscaff27-snap-gene-15.41,VaccDscaff15-augustus-gene-210.26,VaccDscaff26-processed-gene-123.26,VaccDscaff27-augustus-gene-15.34,VaccDscaff86-augustus-gene-5.56,VaccDscaff33-augustus-gene-216.27,VaccDscaff34-snap-gene-278.41,VaccDscaff5-augustus-gene-192.33,VaccDscaff1-augustus-gene-237.23,VaccDscaff29-augustus-gene-121.23,	4.62E-07
Biological process	inorganic ion homeostasis	GO:0098771	4	1.14E-08	9.810595745	11	940	50	41918	VaccDscaff16-augustus-gene-177.42,VaccDscaff27-snap-gene-15.41,VaccDscaff15-augustus-gene-210.26,VaccDscaff26-processed-gene-123.26,VaccDscaff27-augustus-gene-15.34,VaccDscaff86-augustus-gene-5.56,VaccDscaff33-augustus-gene-216.27,VaccDscaff34-snap-gene-278.41,VaccDscaff5-augustus-gene-192.33,VaccDscaff1-augustus-gene-237.23,VaccDscaff29-augustus-gene-121.23,	5.05E-07
Biological process	maintenance of location	GO:0051235	3	1.67E-08	17.60335958	8	381	50	41918	VaccDscaff27-snap-gene-15.41,VaccDscaff26-processed-gene-123.26,VaccDscaff27-augustus-gene-15.34,VaccDscaff33-augustus-gene-216.27,VaccDscaff34-snap-gene-278.41,VaccDscaff5-augustus-gene-192.33,VaccDscaff1-augustus-gene-237.23,VaccDscaff29-augustus-gene-121.23,	6.98E-07
Biological process	obsolete metal ion homeostasis	GO:0055065	0	2.16E-08	10.90195059	10	769	50	41918	VaccDscaff16-augustus-gene-177.42,VaccDscaff27-snap-gene-15.41,VaccDscaff26-processed-gene-123.26,VaccDscaff27-augustus-gene-15.34,VaccDscaff86-augustus-gene-5.56,VaccDscaff33-augustus-gene-216.27,VaccDscaff34-snap-gene-278.41,VaccDscaff5-augustus-gene-192.33,VaccDscaff1-augustus-gene-237.23,VaccDscaff29-augustus-gene-121.23,	8.61E-07
Biological process	monoatomic ion homeostasis	GO:0050801	4	3.82E-08	8.716408318	11	1058	50	41918	VaccDscaff16-augustus-gene-177.42,VaccDscaff27-snap-gene-15.41,VaccDscaff15-augustus-gene-210.26,VaccDscaff26-processed-gene-123.26,VaccDscaff27-augustus-gene-15.34,VaccDscaff86-augustus-gene-5.56,VaccDscaff33-augustus-gene-216.27,VaccDscaff34-snap-gene-278.41,VaccDscaff5-augustus-gene-192.33,VaccDscaff1-augustus-gene-237.23,VaccDscaff29-augustus-gene-121.23,	1.45E-06
Biological process	response to zinc ion	GO:0010043	6	3.89E-08	31.4385	6	160	50	41918	VaccDscaff27-snap-gene-15.41,VaccDscaff37-augustus-gene-173.13,VaccDscaff27-augustus-gene-15.34,VaccDscaff34-snap-gene-278.41,VaccDscaff5-augustus-gene-192.33,VaccDscaff1-augustus-gene-237.23,	1.42E-06
Biological process	response to reactive oxygen species	GO:0000302	5	4.66E-08	10.04023952	10	835	50	41918	VaccDscaff27-snap-gene-15.41,VaccDscaff1437-augustus-gene-0.6,VaccDscaff26-processed-gene-123.26,VaccDscaff27-augustus-gene-15.34,VaccDscaff33-augustus-gene-216.27,VaccDscaff22-processed-gene-12.3,VaccDscaff34-snap-gene-278.41,VaccDscaff5-augustus-gene-192.33,VaccDscaff1-augustus-gene-237.23,VaccDscaff29-augustus-gene-121.23,	1.63E-06
Biological process	homeostatic process	GO:0042592	2	5.15E-08	5.909889225	14	1986	50	41918	VaccDscaff16-augustus-gene-177.42,VaccDscaff27-snap-gene-15.41,VaccDscaff16-augustus-gene-69.27,VaccDscaff6-augustus-gene-154.23,VaccDscaff15-augustus-gene-210.26,VaccDscaff39-snap-gene-44.38,VaccDscaff26-processed-gene-123.26,VaccDscaff27-augustus-gene-15.34,VaccDscaff86-augustus-gene-5.56,VaccDscaff33-augustus-gene-216.27,VaccDscaff34-snap-gene-278.41,VaccDscaff5-augustus-gene-192.33,VaccDscaff…	1.72E-06
Biological process	chemical homeostasis	GO:0048878	3	6.33E-08	6.441300236	13	1692	50	41918	VaccDscaff16-augustus-gene-177.42,VaccDscaff27-snap-gene-15.41,VaccDscaff16-augustus-gene-69.27,VaccDscaff15-augustus-gene-210.26,VaccDscaff39-snap-gene-44.38,VaccDscaff26-processed-gene-123.26,VaccDscaff27-augustus-gene-15.34,VaccDscaff86-augustus-gene-5.56,VaccDscaff33-augustus-gene-216.27,VaccDscaff34-snap-gene-278.41,VaccDscaff5-augustus-gene-192.33,VaccDscaff1-augustus-gene-237.23,VaccDscaff…	1.90E-06
Biological process	metal ion transport	GO:0030001	7	6.34E-07	7.559603246	10	1109	50	41918	VaccDscaff27-snap-gene-15.41,VaccDscaff26-processed-gene-123.26,VaccDscaff27-augustus-gene-15.34,VaccDscaff86-augustus-gene-5.56,VaccDscaff33-augustus-gene-216.27,VaccDscaff34-snap-gene-278.41,VaccDscaff5-augustus-gene-192.33,VaccDscaff1-augustus-gene-237.23,VaccDscaff29-augustus-gene-121.23,VaccDscaff6-augustus-gene-2.40,	1.83E-05
Biological process	response to hydrogen peroxide	GO:0042542	6	6.75E-07	13.93947743	7	421	50	41918	VaccDscaff27-snap-gene-15.41,VaccDscaff1437-augustus-gene-0.6,VaccDscaff27-augustus-gene-15.34,VaccDscaff22-processed-gene-12.3,VaccDscaff34-snap-gene-278.41,VaccDscaff5-augustus-gene-192.33,VaccDscaff1-augustus-gene-237.23,	1.89E-05
Biological process	multicellular organism development	GO:0007275	4	1.55E-06	2.377451948	27	9521	50	41918	VaccDscaff27-snap-gene-15.41,VaccDscaff16-augustus-gene-69.27,VaccDscaff3-processed-gene-32.5,VaccDscaff14-processed-gene-314.0,VaccDscaff24-snap-gene-234.25,VaccDscaff6-augustus-gene-154.23,VaccDscaff9-augustus-gene-15.29,VaccDscaff14-augustus-gene-370.56,VaccDscaff1437-augustus-gene-0.6,VaccDscaff31-processed-gene-29.14,VaccDscaff9-augustus-gene-306.24,VaccDscaff11-augustus-gene-300.21,VaccDsca…	3.93E-05
Biological process	positive regulation of programmed cell death	GO:0043068	6	2.37E-06	23.5494382	5	178	50	41918	VaccDscaff6-augustus-gene-154.23,VaccDscaff1437-augustus-gene-0.6,VaccDscaff46-processed-gene-1.23,VaccDscaff14-augustus-gene-325.40,VaccDscaff22-processed-gene-12.3,	5.84E-05
Biological process	post-embryonic development	GO:0009791	3	2.97E-06	2.844653417	21	6189	50	41918	VaccDscaff27-snap-gene-15.41,VaccDscaff3-processed-gene-32.5,VaccDscaff14-processed-gene-314.0,VaccDscaff14-augustus-gene-370.56,VaccDscaff1437-augustus-gene-0.6,VaccDscaff31-processed-gene-29.14,VaccDscaff9-augustus-gene-306.24,VaccDscaff11-augustus-gene-300.21,VaccDscaff25-augustus-gene-163.34,VaccDscaff36-augustus-gene-115.21,VaccDscaff36-augustus-gene-115.22,VaccDscaff26-processed-gene-123.26…	6.91E-05
Biological process	multicellular organismal process	GO:0032501	2	5.24E-06	2.176750742	28	10784	50	41918	VaccDscaff27-snap-gene-15.41,VaccDscaff16-augustus-gene-69.27,VaccDscaff3-processed-gene-32.5,VaccDscaff14-processed-gene-314.0,VaccDscaff24-snap-gene-234.25,VaccDscaff6-augustus-gene-154.23,VaccDscaff9-augustus-gene-15.29,VaccDscaff14-augustus-gene-370.56,VaccDscaff1437-augustus-gene-0.6,VaccDscaff31-processed-gene-29.14,VaccDscaff9-augustus-gene-306.24,VaccDscaff11-augustus-gene-300.21,VaccDsca…	1.19E-04
Biological process	response to external stimulus	GO:0009605	3	7.08E-06	2.809046741	20	5969	50	41918	VaccDscaff27-snap-gene-15.41,VaccDscaff9-augustus-gene-132.34,VaccDscaff14-processed-gene-314.0,VaccDscaff6-augustus-gene-154.23,VaccDscaff14-augustus-gene-370.56,VaccDscaff1437-augustus-gene-0.6,VaccDscaff9-augustus-gene-306.24,VaccDscaff25-augustus-gene-163.34,VaccDscaff34-processed-gene-130.22,VaccDscaff36-augustus-gene-115.21,VaccDscaff46-processed-gene-1.23,VaccDscaff36-augustus-gene-115.22,…	1.56E-04
Biological process	regulation of biological quality	GO:0065008	3	1.15E-05	3.127522493	17	4557	50	41918	VaccDscaff16-augustus-gene-177.42,VaccDscaff27-snap-gene-15.41,VaccDscaff16-augustus-gene-69.27,VaccDscaff6-augustus-gene-154.23,VaccDscaff15-augustus-gene-210.26,VaccDscaff9-augustus-gene-306.24,VaccDscaff39-snap-gene-44.38,VaccDscaff36-augustus-gene-115.21,VaccDscaff36-augustus-gene-115.22,VaccDscaff26-processed-gene-123.26,VaccDscaff27-augustus-gene-15.34,VaccDscaff86-augustus-gene-5.56,VaccDs…	2.47E-04
Biological process	response to oxidative stress	GO:0006979	4	1.24E-05	5.405286912	10	1551	50	41918	VaccDscaff27-snap-gene-15.41,VaccDscaff1437-augustus-gene-0.6,VaccDscaff26-processed-gene-123.26,VaccDscaff27-augustus-gene-15.34,VaccDscaff33-augustus-gene-216.27,VaccDscaff22-processed-gene-12.3,VaccDscaff34-snap-gene-278.41,VaccDscaff5-augustus-gene-192.33,VaccDscaff1-augustus-gene-237.23,VaccDscaff29-augustus-gene-121.23,	2.60E-04
Biological process	regulation of programmed cell death	GO:0043067	5	2.14E-05	10.58981053	6	475	50	41918	VaccDscaff6-augustus-gene-154.23,VaccDscaff1437-augustus-gene-0.6,VaccDscaff46-processed-gene-1.23,VaccDscaff37-augustus-gene-173.13,VaccDscaff14-augustus-gene-325.40,VaccDscaff22-processed-gene-12.3,	4.37E-04
Biological process	plant organ development	GO:0099402	4	2.41E-05	3.299763842	15	3811	50	41918	VaccDscaff27-snap-gene-15.41,VaccDscaff14-processed-gene-314.0,VaccDscaff24-snap-gene-234.25,VaccDscaff14-augustus-gene-370.56,VaccDscaff9-augustus-gene-306.24,VaccDscaff36-augustus-gene-115.21,VaccDscaff36-augustus-gene-115.22,VaccDscaff26-processed-gene-123.26,VaccDscaff27-augustus-gene-15.34,VaccDscaff9-processed-gene-169.15,VaccDscaff33-augustus-gene-216.27,VaccDscaff34-snap-gene-278.41,VaccD…	4.80E-04
Biological process	obsolete multi-organism process	GO:0051704	0	2.47E-05	2.814337934	18	5362	50	41918	VaccDscaff27-snap-gene-15.41,VaccDscaff9-augustus-gene-132.34,VaccDscaff14-processed-gene-314.0,VaccDscaff14-augustus-gene-370.56,VaccDscaff1437-augustus-gene-0.6,VaccDscaff9-augustus-gene-306.24,VaccDscaff25-augustus-gene-163.34,VaccDscaff34-processed-gene-130.22,VaccDscaff36-augustus-gene-115.21,VaccDscaff46-processed-gene-1.23,VaccDscaff36-augustus-gene-115.22,VaccDscaff27-augustus-gene-15.34,…	4.82E-04
Biological process	monoatomic cation transport	GO:0006812	6	2.58E-05	4.963647128	10	1689	50	41918	VaccDscaff27-snap-gene-15.41,VaccDscaff26-processed-gene-123.26,VaccDscaff27-augustus-gene-15.34,VaccDscaff86-augustus-gene-5.56,VaccDscaff33-augustus-gene-216.27,VaccDscaff34-snap-gene-278.41,VaccDscaff5-augustus-gene-192.33,VaccDscaff1-augustus-gene-237.23,VaccDscaff29-augustus-gene-121.23,VaccDscaff6-augustus-gene-2.40,	4.92E-04
Biological process	system development	GO:0048731	4	2.86E-05	2.467492642	21	7135	50	41918	VaccDscaff27-snap-gene-15.41,VaccDscaff3-processed-gene-32.5,VaccDscaff14-processed-gene-314.0,VaccDscaff24-snap-gene-234.25,VaccDscaff6-augustus-gene-154.23,VaccDscaff14-augustus-gene-370.56,VaccDscaff1437-augustus-gene-0.6,VaccDscaff9-augustus-gene-306.24,VaccDscaff25-augustus-gene-163.34,VaccDscaff36-augustus-gene-115.21,VaccDscaff36-augustus-gene-115.22,VaccDscaff26-processed-gene-123.26,Vacc…	5.33E-04
Biological process	response to other organism	GO:0051707	5	3.25E-05	3.04097937	16	4411	50	41918	VaccDscaff27-snap-gene-15.41,VaccDscaff9-augustus-gene-132.34,VaccDscaff14-processed-gene-314.0,VaccDscaff6-augustus-gene-154.23,VaccDscaff14-augustus-gene-370.56,VaccDscaff1437-augustus-gene-0.6,VaccDscaff25-augustus-gene-163.34,VaccDscaff34-processed-gene-130.22,VaccDscaff46-processed-gene-1.23,VaccDscaff27-augustus-gene-15.34,VaccDscaff22-processed-gene-12.3,VaccDscaff34-snap-gene-278.41,VaccD…	5.92E-04
Biological process	response to external biotic stimulus	GO:0043207	4	3.38E-05	3.031358192	16	4425	50	41918	VaccDscaff27-snap-gene-15.41,VaccDscaff9-augustus-gene-132.34,VaccDscaff14-processed-gene-314.0,VaccDscaff6-augustus-gene-154.23,VaccDscaff14-augustus-gene-370.56,VaccDscaff1437-augustus-gene-0.6,VaccDscaff25-augustus-gene-163.34,VaccDscaff34-processed-gene-130.22,VaccDscaff46-processed-gene-1.23,VaccDscaff27-augustus-gene-15.34,VaccDscaff22-processed-gene-12.3,VaccDscaff34-snap-gene-278.41,VaccD…	6.03E-04
Biological process	response to biotic stimulus	GO:0009607	3	3.70E-05	3.008918798	16	4458	50	41918	VaccDscaff27-snap-gene-15.41,VaccDscaff9-augustus-gene-132.34,VaccDscaff14-processed-gene-314.0,VaccDscaff6-augustus-gene-154.23,VaccDscaff14-augustus-gene-370.56,VaccDscaff1437-augustus-gene-0.6,VaccDscaff25-augustus-gene-163.34,VaccDscaff34-processed-gene-130.22,VaccDscaff46-processed-gene-1.23,VaccDscaff27-augustus-gene-15.34,VaccDscaff22-processed-gene-12.3,VaccDscaff34-snap-gene-278.41,VaccD…	6.47E-04
Biological process	anatomical structure development	GO:0048856	3	4.32E-05	2.011706363	27	11252	50	41918	VaccDscaff27-snap-gene-15.41,VaccDscaff16-augustus-gene-69.27,VaccDscaff3-processed-gene-32.5,VaccDscaff14-processed-gene-314.0,VaccDscaff24-snap-gene-234.25,VaccDscaff6-augustus-gene-154.23,VaccDscaff9-augustus-gene-15.29,VaccDscaff14-augustus-gene-370.56,VaccDscaff1437-augustus-gene-0.6,VaccDscaff31-processed-gene-29.14,VaccDscaff9-augustus-gene-306.24,VaccDscaff11-augustus-gene-300.21,VaccDsca…	7.39E-04
Biological process	response to metal ion	GO:0010038	5	4.60E-05	4.636946903	10	1808	50	41918	VaccDscaff27-snap-gene-15.41,VaccDscaff26-processed-gene-123.26,VaccDscaff37-augustus-gene-173.13,VaccDscaff13-augustus-gene-69.34,VaccDscaff27-augustus-gene-15.34,VaccDscaff33-augustus-gene-216.27,VaccDscaff34-snap-gene-278.41,VaccDscaff5-augustus-gene-192.33,VaccDscaff1-augustus-gene-237.23,VaccDscaff29-augustus-gene-121.23,	7.71E-04
Biological process	leaf development	GO:0048366	6	4.98E-05	5.18217033	9	1456	50	41918	VaccDscaff27-snap-gene-15.41,VaccDscaff24-snap-gene-234.25,VaccDscaff26-processed-gene-123.26,VaccDscaff27-augustus-gene-15.34,VaccDscaff33-augustus-gene-216.27,VaccDscaff34-snap-gene-278.41,VaccDscaff5-augustus-gene-192.33,VaccDscaff1-augustus-gene-237.23,VaccDscaff29-augustus-gene-121.23,	8.18E-04
Biological process	biological process involved in interspecies interaction between organisms	GO:0044419	2	5.24E-05	2.924936764	16	4586	50	41918	VaccDscaff27-snap-gene-15.41,VaccDscaff9-augustus-gene-132.34,VaccDscaff14-processed-gene-314.0,VaccDscaff6-augustus-gene-154.23,VaccDscaff14-augustus-gene-370.56,VaccDscaff1437-augustus-gene-0.6,VaccDscaff25-augustus-gene-163.34,VaccDscaff34-processed-gene-130.22,VaccDscaff46-processed-gene-1.23,VaccDscaff27-augustus-gene-15.34,VaccDscaff22-processed-gene-12.3,VaccDscaff34-snap-gene-278.41,VaccD…	8.45E-04
Biological process	response to cytokinin	GO:0009735	6	7.12E-05	6.792268519	7	864	50	41918	VaccDscaff27-snap-gene-15.41,VaccDscaff37-augustus-gene-173.13,VaccDscaff27-augustus-gene-15.34,VaccDscaff1-processed-gene-280.9,VaccDscaff34-snap-gene-278.41,VaccDscaff5-augustus-gene-192.33,VaccDscaff1-augustus-gene-237.23,	0.001126545
Biological process	developmental process involved in reproduction	GO:0003006	3	1.01E-04	2.64466877	17	5389	50	41918	VaccDscaff27-snap-gene-15.41,VaccDscaff3-processed-gene-32.5,VaccDscaff14-augustus-gene-370.56,VaccDscaff1437-augustus-gene-0.6,VaccDscaff9-augustus-gene-306.24,VaccDscaff25-augustus-gene-163.34,VaccDscaff36-augustus-gene-115.21,VaccDscaff36-augustus-gene-115.22,VaccDscaff26-processed-gene-123.26,VaccDscaff37-augustus-gene-173.13,VaccDscaff27-augustus-gene-15.34,VaccDscaff33-augustus-gene-216.27,…	0.001536552
Biological process	response to antibiotic	GO:0046677	4	1.15E-04	5.318699445	8	1261	50	41918	VaccDscaff27-snap-gene-15.41,VaccDscaff1437-augustus-gene-0.6,VaccDscaff34-processed-gene-130.22,VaccDscaff27-augustus-gene-15.34,VaccDscaff22-processed-gene-12.3,VaccDscaff34-snap-gene-278.41,VaccDscaff5-augustus-gene-192.33,VaccDscaff1-augustus-gene-237.23,	0.001714958
Biological process	developmental process	GO:0032502	2	1.42E-04	1.888355719	27	11987	50	41918	VaccDscaff27-snap-gene-15.41,VaccDscaff16-augustus-gene-69.27,VaccDscaff3-processed-gene-32.5,VaccDscaff14-processed-gene-314.0,VaccDscaff24-snap-gene-234.25,VaccDscaff6-augustus-gene-154.23,VaccDscaff9-augustus-gene-15.29,VaccDscaff14-augustus-gene-370.56,VaccDscaff1437-augustus-gene-0.6,VaccDscaff31-processed-gene-29.14,VaccDscaff9-augustus-gene-306.24,VaccDscaff11-augustus-gene-300.21,VaccDsca…	0.002085211
Biological process	reproductive process	GO:0022414	2	1.72E-04	2.43237911	18	6204	50	41918	VaccDscaff27-snap-gene-15.41,VaccDscaff3-processed-gene-32.5,VaccDscaff14-augustus-gene-370.56,VaccDscaff1437-augustus-gene-0.6,VaccDscaff31-processed-gene-29.14,VaccDscaff9-augustus-gene-306.24,VaccDscaff25-augustus-gene-163.34,VaccDscaff36-augustus-gene-115.21,VaccDscaff36-augustus-gene-115.22,VaccDscaff26-processed-gene-123.26,VaccDscaff37-augustus-gene-173.13,VaccDscaff27-augustus-gene-15.34,…	0.002488424
Biological process	reproduction	GO:0000003	2	1.91E-04	2.412932523	18	6254	50	41918	VaccDscaff27-snap-gene-15.41,VaccDscaff3-processed-gene-32.5,VaccDscaff14-augustus-gene-370.56,VaccDscaff1437-augustus-gene-0.6,VaccDscaff31-processed-gene-29.14,VaccDscaff9-augustus-gene-306.24,VaccDscaff25-augustus-gene-163.34,VaccDscaff36-augustus-gene-115.21,VaccDscaff36-augustus-gene-115.22,VaccDscaff26-processed-gene-123.26,VaccDscaff37-augustus-gene-173.13,VaccDscaff27-augustus-gene-15.34,…	0.002712867
Biological process	response to toxic substance	GO:0009636	4	2.86E-04	5.418762696	7	1083	50	41918	VaccDscaff27-snap-gene-15.41,VaccDscaff1437-augustus-gene-0.6,VaccDscaff27-augustus-gene-15.34,VaccDscaff22-processed-gene-12.3,VaccDscaff34-snap-gene-278.41,VaccDscaff5-augustus-gene-192.33,VaccDscaff1-augustus-gene-237.23,	0.003740466
Biological process	response to inorganic substance	GO:0010035	4	3.06E-04	2.941614035	13	3705	50	41918	VaccDscaff27-snap-gene-15.41,VaccDscaff1437-augustus-gene-0.6,VaccDscaff26-processed-gene-123.26,VaccDscaff37-augustus-gene-173.13,VaccDscaff13-augustus-gene-69.34,VaccDscaff27-augustus-gene-15.34,VaccDscaff33-augustus-gene-216.27,VaccDscaff22-processed-gene-12.3,VaccDscaff34-snap-gene-278.41,VaccDscaff2-snap-gene-317.38,VaccDscaff5-augustus-gene-192.33,VaccDscaff1-augustus-gene-237.23,VaccDscaff…	0.003888027
Biological process	flower development	GO:0009908	7	3.26E-04	4.039207709	9	1868	50	41918	VaccDscaff27-snap-gene-15.41,VaccDscaff3-processed-gene-32.5,VaccDscaff26-processed-gene-123.26,VaccDscaff27-augustus-gene-15.34,VaccDscaff33-augustus-gene-216.27,VaccDscaff34-snap-gene-278.41,VaccDscaff5-augustus-gene-192.33,VaccDscaff1-augustus-gene-237.23,VaccDscaff29-augustus-gene-121.23,	0.004072231
Biological process	reproductive shoot system development	GO:0090567	6	3.69E-04	3.971178947	9	1900	50	41918	VaccDscaff27-snap-gene-15.41,VaccDscaff3-processed-gene-32.5,VaccDscaff26-processed-gene-123.26,VaccDscaff27-augustus-gene-15.34,VaccDscaff33-augustus-gene-216.27,VaccDscaff34-snap-gene-278.41,VaccDscaff5-augustus-gene-192.33,VaccDscaff1-augustus-gene-237.23,VaccDscaff29-augustus-gene-121.23,	0.004543912
Biological process	monoatomic ion transport	GO:0006811	5	3.74E-04	3.300629921	11	2794	50	41918	VaccDscaff27-snap-gene-15.41,VaccDscaff15-augustus-gene-210.26,VaccDscaff26-processed-gene-123.26,VaccDscaff27-augustus-gene-15.34,VaccDscaff86-augustus-gene-5.56,VaccDscaff33-augustus-gene-216.27,VaccDscaff34-snap-gene-278.41,VaccDscaff5-augustus-gene-192.33,VaccDscaff1-augustus-gene-237.23,VaccDscaff29-augustus-gene-121.23,VaccDscaff6-augustus-gene-2.40,	0.004540679
Biological process	response to stress	GO:0006950	3	3.89E-04	1.867005167	25	11226	50	41918	VaccDscaff27-snap-gene-15.41,VaccDscaff9-augustus-gene-132.34,VaccDscaff14-processed-gene-314.0,VaccDscaff6-augustus-gene-154.23,VaccDscaff20-augustus-gene-264.32,VaccDscaff14-augustus-gene-370.56,VaccDscaff1437-augustus-gene-0.6,VaccDscaff31-processed-gene-29.14,VaccDscaff25-augustus-gene-163.34,VaccDscaff34-processed-gene-130.22,VaccDscaff46-processed-gene-1.23,VaccDscaff26-processed-gene-123.2…	0.004650971
Biological process	phyllome development	GO:0048827	5	5.96E-04	3.716866995	9	2030	50	41918	VaccDscaff27-snap-gene-15.41,VaccDscaff24-snap-gene-234.25,VaccDscaff26-processed-gene-123.26,VaccDscaff27-augustus-gene-15.34,VaccDscaff33-augustus-gene-216.27,VaccDscaff34-snap-gene-278.41,VaccDscaff5-augustus-gene-192.33,VaccDscaff1-augustus-gene-237.23,VaccDscaff29-augustus-gene-121.23,	0.006656842
Biological process	reproductive system development	GO:0061458	5	6.44E-04	2.582975352	14	4544	50	41918	VaccDscaff27-snap-gene-15.41,VaccDscaff3-processed-gene-32.5,VaccDscaff14-augustus-gene-370.56,VaccDscaff1437-augustus-gene-0.6,VaccDscaff25-augustus-gene-163.34,VaccDscaff26-processed-gene-123.26,VaccDscaff37-augustus-gene-173.13,VaccDscaff27-augustus-gene-15.34,VaccDscaff33-augustus-gene-216.27,VaccDscaff22-processed-gene-12.3,VaccDscaff34-snap-gene-278.41,VaccDscaff5-augustus-gene-192.33,VaccD…	0.007105537
Biological process	reproductive structure development	GO:0048608	4	6.44E-04	2.582975352	14	4544	50	41918	VaccDscaff27-snap-gene-15.41,VaccDscaff3-processed-gene-32.5,VaccDscaff14-augustus-gene-370.56,VaccDscaff1437-augustus-gene-0.6,VaccDscaff25-augustus-gene-163.34,VaccDscaff26-processed-gene-123.26,VaccDscaff37-augustus-gene-173.13,VaccDscaff27-augustus-gene-15.34,VaccDscaff33-augustus-gene-216.27,VaccDscaff22-processed-gene-12.3,VaccDscaff34-snap-gene-278.41,VaccDscaff5-augustus-gene-192.33,VaccD…	0.007105537
Biological process	post-embryonic root development	GO:0048528	6	6.52E-04	7.177739726	5	584	50	41918	VaccDscaff14-processed-gene-314.0,VaccDscaff14-augustus-gene-370.56,VaccDscaff9-augustus-gene-306.24,VaccDscaff36-augustus-gene-115.21,VaccDscaff36-augustus-gene-115.22,	0.007002898
Biological process	programmed cell death	GO:0012501	4	0.001085801	5.11195122	6	984	50	41918	VaccDscaff6-augustus-gene-154.23,VaccDscaff1437-augustus-gene-0.6,VaccDscaff46-processed-gene-1.23,VaccDscaff37-augustus-gene-173.13,VaccDscaff14-augustus-gene-325.40,VaccDscaff22-processed-gene-12.3,	0.011233347
Biological process	obsolete regulation of cell death	GO:0010941	0	0.001210537	6.24709389	5	671	50	41918	VaccDscaff6-augustus-gene-154.23,VaccDscaff1437-augustus-gene-0.6,VaccDscaff37-augustus-gene-173.13,VaccDscaff14-augustus-gene-325.40,VaccDscaff22-processed-gene-12.3,	0.01222205
Biological process	cell death	GO:0008219	3	0.001792743	4.631823204	6	1086	50	41918	VaccDscaff6-augustus-gene-154.23,VaccDscaff1437-augustus-gene-0.6,VaccDscaff46-processed-gene-1.23,VaccDscaff37-augustus-gene-173.13,VaccDscaff14-augustus-gene-325.40,VaccDscaff22-processed-gene-12.3,	0.017468822
Biological process	response to bacterium	GO:0009617	6	0.001894462	3.476868844	8	1929	50	41918	VaccDscaff27-snap-gene-15.41,VaccDscaff9-augustus-gene-132.34,VaccDscaff14-processed-gene-314.0,VaccDscaff25-augustus-gene-163.34,VaccDscaff27-augustus-gene-15.34,VaccDscaff34-snap-gene-278.41,VaccDscaff5-augustus-gene-192.33,VaccDscaff1-augustus-gene-237.23,	0.018247806
Biological process	biological regulation	GO:0065007	2	0.001977222	1.475198891	33	18754	50	41918	VaccDscaff16-augustus-gene-177.42,VaccDscaff27-snap-gene-15.41,VaccDscaff16-augustus-gene-69.27,VaccDscaff9-augustus-gene-132.34,VaccDscaff3-processed-gene-32.5,VaccDscaff14-processed-gene-314.0,VaccDscaff6-augustus-gene-154.23,VaccDscaff14-augustus-gene-370.56,VaccDscaff15-augustus-gene-210.26,VaccDscaff1437-augustus-gene-0.6,VaccDscaff31-processed-gene-29.14,VaccDscaff9-augustus-gene-306.24,Vac…	0.018828542
Biological process	response to chemical	GO:0042221	3	0.00226535	1.70412806	24	11807	50	41918	VaccDscaff27-snap-gene-15.41,VaccDscaff6-augustus-gene-154.23,VaccDscaff20-augustus-gene-264.32,VaccDscaff14-augustus-gene-370.56,VaccDscaff1437-augustus-gene-0.6,VaccDscaff31-processed-gene-29.14,VaccDscaff9-augustus-gene-306.24,VaccDscaff34-processed-gene-130.22,VaccDscaff36-augustus-gene-115.21,VaccDscaff36-augustus-gene-115.22,VaccDscaff26-processed-gene-123.26,VaccDscaff37-augustus-gene-173.…	0.021092927
Biological process	post-embryonic plant organ development	GO:0090696	5	0.002705563	5.194299876	5	807	50	41918	VaccDscaff14-processed-gene-314.0,VaccDscaff14-augustus-gene-370.56,VaccDscaff9-augustus-gene-306.24,VaccDscaff36-augustus-gene-115.21,VaccDscaff36-augustus-gene-115.22,	0.02464415
Biological process	shoot system development	GO:0048367	5	0.004361644	2.590729295	10	3236	50	41918	VaccDscaff27-snap-gene-15.41,VaccDscaff3-processed-gene-32.5,VaccDscaff24-snap-gene-234.25,VaccDscaff26-processed-gene-123.26,VaccDscaff27-augustus-gene-15.34,VaccDscaff33-augustus-gene-216.27,VaccDscaff34-snap-gene-278.41,VaccDscaff5-augustus-gene-192.33,VaccDscaff1-augustus-gene-237.23,VaccDscaff29-augustus-gene-121.23,	0.037296505
Biological process	response to temperature stimulus	GO:0009266	4	0.005181175	2.94937555	8	2274	50	41918	VaccDscaff27-snap-gene-15.41,VaccDscaff1437-augustus-gene-0.6,VaccDscaff27-augustus-gene-15.34,VaccDscaff35-snap-gene-33.12,VaccDscaff22-processed-gene-12.3,VaccDscaff34-snap-gene-278.41,VaccDscaff5-augustus-gene-192.33,VaccDscaff1-augustus-gene-237.23,	0.039471131
Biological process	response to oxygen-containing compound	GO:1901700	4	0.008314942	1.90420957	15	6604	50	41918	VaccDscaff27-snap-gene-15.41,VaccDscaff14-augustus-gene-370.56,VaccDscaff1437-augustus-gene-0.6,VaccDscaff31-processed-gene-29.14,VaccDscaff34-processed-gene-130.22,VaccDscaff26-processed-gene-123.26,VaccDscaff27-augustus-gene-15.34,VaccDscaff33-augustus-gene-216.27,VaccDscaff22-processed-gene-12.3,VaccDscaff34-snap-gene-278.41,VaccDscaff26-augustus-gene-359.36,VaccDscaff2-snap-gene-317.38,VaccDs…	0.052390389
Biological process	methylation	GO:0032259	3	0.01039923	3.759461883	5	1115	50	41918	VaccDscaff9-augustus-gene-306.24,VaccDscaff23-snap-gene-74.33,VaccDscaff36-augustus-gene-115.21,VaccDscaff36-augustus-gene-115.22,VaccDscaff30-processed-gene-58.9,	0.058097031
Biological process	response to cold	GO:0009409	5	0.010763243	3.195781449	6	1574	50	41918	VaccDscaff27-snap-gene-15.41,VaccDscaff27-augustus-gene-15.34,VaccDscaff35-snap-gene-33.12,VaccDscaff34-snap-gene-278.41,VaccDscaff5-augustus-gene-192.33,VaccDscaff1-augustus-gene-237.23,	0.054009565
Biological process	innate immune response	GO:0045087	7	0.012984389	3.067170732	6	1640	50	41918	VaccDscaff6-augustus-gene-154.23,VaccDscaff14-augustus-gene-370.56,VaccDscaff1437-augustus-gene-0.6,VaccDscaff34-processed-gene-130.22,VaccDscaff22-processed-gene-12.3,VaccDscaff43-augustus-gene-6.36,	0.061128752
Biological process	cellular localization	GO:0051641	3	0.016606337	2.249624329	9	3354	50	41918	VaccDscaff27-snap-gene-15.41,VaccDscaff6-augustus-gene-154.23,VaccDscaff26-processed-gene-123.26,VaccDscaff27-augustus-gene-15.34,VaccDscaff33-augustus-gene-216.27,VaccDscaff34-snap-gene-278.41,VaccDscaff5-augustus-gene-192.33,VaccDscaff1-augustus-gene-237.23,VaccDscaff29-augustus-gene-121.23,	0.073242685
Biological process	defense response to other organism	GO:0098542	6	0.01750973	2.229680851	9	3384	50	41918	VaccDscaff9-augustus-gene-132.34,VaccDscaff14-processed-gene-314.0,VaccDscaff6-augustus-gene-154.23,VaccDscaff14-augustus-gene-370.56,VaccDscaff1437-augustus-gene-0.6,VaccDscaff34-processed-gene-130.22,VaccDscaff46-processed-gene-1.23,VaccDscaff22-processed-gene-12.3,VaccDscaff43-augustus-gene-6.36,	0.076822794
Biological process	immune response	GO:0006955	3	0.019489014	2.800757238	6	1796	50	41918	VaccDscaff6-augustus-gene-154.23,VaccDscaff14-augustus-gene-370.56,VaccDscaff1437-augustus-gene-0.6,VaccDscaff34-processed-gene-130.22,VaccDscaff22-processed-gene-12.3,VaccDscaff43-augustus-gene-6.36,	0.082483807
Biological process	response to abiotic stimulus	GO:0009628	3	0.021277776	1.711637403	15	7347	50	41918	VaccDscaff27-snap-gene-15.41,VaccDscaff14-processed-gene-314.0,VaccDscaff20-augustus-gene-264.32,VaccDscaff1437-augustus-gene-0.6,VaccDscaff31-processed-gene-29.14,VaccDscaff37-augustus-gene-173.13,VaccDscaff27-augustus-gene-15.34,VaccDscaff35-snap-gene-33.12,VaccDscaff29-augustus-gene-44.30,VaccDscaff22-augustus-gene-302.27,VaccDscaff22-processed-gene-12.3,VaccDscaff34-snap-gene-278.41,VaccDscaf…	0.086139014
Biological process	cellular lipid metabolic process	GO:0044255	5	0.022814009	2.450321503	7	2395	50	41918	VaccDscaff16-augustus-gene-69.27,VaccDscaff9-augustus-gene-132.34,VaccDscaff9-augustus-gene-306.24,VaccDscaff36-augustus-gene-115.21,VaccDscaff36-augustus-gene-115.22,VaccDscaff22-augustus-gene-86.29,VaccDscaff26-augustus-gene-359.36,	0.091038759
Biological process	lipid biosynthetic process	GO:0008610	5	0.026929646	2.599565891	6	1935	50	41918	VaccDscaff16-augustus-gene-69.27,VaccDscaff9-augustus-gene-132.34,VaccDscaff9-augustus-gene-306.24,VaccDscaff36-augustus-gene-115.21,VaccDscaff36-augustus-gene-115.22,VaccDscaff26-augustus-gene-359.36,	0.101197504
Biological process	response to stimulus	GO:0050896	2	0.028033994	1.304414776	31	19924	50	41918	VaccDscaff27-snap-gene-15.41,VaccDscaff9-augustus-gene-132.34,VaccDscaff14-processed-gene-314.0,VaccDscaff6-augustus-gene-154.23,VaccDscaff20-augustus-gene-264.32,VaccDscaff14-augustus-gene-370.56,VaccDscaff1437-augustus-gene-0.6,VaccDscaff31-processed-gene-29.14,VaccDscaff9-augustus-gene-306.24,VaccDscaff25-augustus-gene-163.34,VaccDscaff34-processed-gene-130.22,VaccDscaff36-augustus-gene-115.21…	0.104411053
Biological process	response to xenobiotic stimulus	GO:0009410	4	0.0287849	2.046444264	9	3687	50	41918	VaccDscaff27-snap-gene-15.41,VaccDscaff20-augustus-gene-264.32,VaccDscaff1437-augustus-gene-0.6,VaccDscaff34-processed-gene-130.22,VaccDscaff27-augustus-gene-15.34,VaccDscaff22-processed-gene-12.3,VaccDscaff34-snap-gene-278.41,VaccDscaff5-augustus-gene-192.33,VaccDscaff1-augustus-gene-237.23,	0.105797133
Biological process	immune system process	GO:0002376	2	0.037466145	2.40332537	6	2093	50	41918	VaccDscaff6-augustus-gene-154.23,VaccDscaff14-augustus-gene-370.56,VaccDscaff1437-augustus-gene-0.6,VaccDscaff34-processed-gene-130.22,VaccDscaff22-processed-gene-12.3,VaccDscaff43-augustus-gene-6.36,	0.125586517
Biological process	response to organic substance	GO:0010033	4	0.038720034	1.556481782	16	8618	50	41918	VaccDscaff27-snap-gene-15.41,VaccDscaff6-augustus-gene-154.23,VaccDscaff20-augustus-gene-264.32,VaccDscaff14-augustus-gene-370.56,VaccDscaff1437-augustus-gene-0.6,VaccDscaff31-processed-gene-29.14,VaccDscaff34-processed-gene-130.22,VaccDscaff37-augustus-gene-173.13,VaccDscaff27-augustus-gene-15.34,VaccDscaff1-processed-gene-280.9,VaccDscaff22-processed-gene-12.3,VaccDscaff34-snap-gene-278.41,Vacc…	0.126254428
Biological process	defense response	GO:0006952	4	0.042438314	1.90777244	9	3955	50	41918	VaccDscaff9-augustus-gene-132.34,VaccDscaff14-processed-gene-314.0,VaccDscaff6-augustus-gene-154.23,VaccDscaff14-augustus-gene-370.56,VaccDscaff1437-augustus-gene-0.6,VaccDscaff34-processed-gene-130.22,VaccDscaff46-processed-gene-1.23,VaccDscaff22-processed-gene-12.3,VaccDscaff43-augustus-gene-6.36,	0.135737813
Biological process	response to hormone	GO:0009725	5	0.04589697	1.679799633	12	5989	50	41918	VaccDscaff27-snap-gene-15.41,VaccDscaff20-augustus-gene-264.32,VaccDscaff14-augustus-gene-370.56,VaccDscaff31-processed-gene-29.14,VaccDscaff34-processed-gene-130.22,VaccDscaff37-augustus-gene-173.13,VaccDscaff27-augustus-gene-15.34,VaccDscaff1-processed-gene-280.9,VaccDscaff34-snap-gene-278.41,VaccDscaff26-augustus-gene-359.36,VaccDscaff5-augustus-gene-192.33,VaccDscaff1-augustus-gene-237.23,	0.142450596
