# Supplementary material for: Supplementary Low Far-Red Light Promotes Proliferation and Photosynthetic Capacity of Blueberry In Vitro Plantlets
Source: Int J Mol Sci. 2024 Jan 5;25(2):688. doi: 10.3390/ijms25020688 (PMC10815622; doi:10.3390/ijms25020688)
Supplement: Supplementary file 1 [file ijms-25-00688-s001.zip › Supplementary Materials/Table S9 leaf_magenta_go_predictions.xlsx]

## Sheet: Sheet1
intracellular sequestering of iron ion GO:0006880	gene predictions	sequestering of iron ion GO:0097577	gene predictions	iron ion transportGO:0006826	gene predictions	sequestering of metal ion GO:0051238	gene predictions	obsolete iron ion homeostasis GO:0055072	gene predictions	intracellular iron ion homeostasis GO:0006879	gene predictions	transition metal ion transport GO:0000041	gene predictions	intracellular monoatomic cation homeostasis GO:0030003	gene predictions	photosynthesis GO:0015979	gene predictions
VaccDscaff27-snap-gene-15.41	FER1	VaccDscaff27-snap-gene-15.41	FER1	VaccDscaff27-snap-gene-15.41	FER1	VaccDscaff27-snap-gene-15.41	FER1	VaccDscaff27-snap-gene-15.41	FER1	VaccDscaff27-snap-gene-15.41	FER1	VaccDscaff27-snap-gene-15.41	FER1	VaccDscaff16-augustus-gene-177.42	AtHMP03	VaccDscaff27-snap-gene-15.41	FER1
VaccDscaff26-processed-gene-123.26	FER2	VaccDscaff26-processed-gene-123.26	FER2	VaccDscaff26-processed-gene-123.26	FER2	VaccDscaff26-processed-gene-123.26	FER2	VaccDscaff26-processed-gene-123.26	FER2	VaccDscaff26-processed-gene-123.26	FER2	VaccDscaff26-processed-gene-123.26	FER2	VaccDscaff27-snap-gene-15.41	FER1	VaccDscaff26-processed-gene-123.26	FER2
VaccDscaff27-augustus-gene-15.34	FER1	VaccDscaff27-augustus-gene-15.34	FER1	VaccDscaff27-augustus-gene-15.34	FER1	VaccDscaff27-augustus-gene-15.34	FER1	VaccDscaff27-augustus-gene-15.34	FER1	VaccDscaff27-augustus-gene-15.34	FER1	VaccDscaff27-augustus-gene-15.34	FER1	VaccDscaff15-augustus-gene-210.26	TDT	VaccDscaff37-augustus-gene-173.13	PDI5
VaccDscaff33-augustus-gene-216.27	FER2	VaccDscaff86-augustus-gene-5.56	OPT3	VaccDscaff33-augustus-gene-216.27	FER2	VaccDscaff86-augustus-gene-5.56	OPT3	VaccDscaff86-augustus-gene-5.56	OPT3	VaccDscaff33-augustus-gene-216.27	FER2	VaccDscaff86-augustus-gene-5.56	OPT3	VaccDscaff26-processed-gene-123.26	FER2	VaccDscaff27-augustus-gene-15.34	FER1
VaccDscaff34-snap-gene-278.41	FER1	VaccDscaff33-augustus-gene-216.27	FER2	VaccDscaff34-snap-gene-278.41	FER1	VaccDscaff33-augustus-gene-216.27	FER2	VaccDscaff33-augustus-gene-216.27	FER2	VaccDscaff34-snap-gene-278.41	FER1	VaccDscaff33-augustus-gene-216.27	FER2	VaccDscaff27-augustus-gene-15.34	FER1	VaccDscaff33-augustus-gene-216.27	FER2
VaccDscaff5-augustus-gene-192.33	FER1	VaccDscaff34-snap-gene-278.41	FER1	VaccDscaff5-augustus-gene-192.33	FER1	VaccDscaff34-snap-gene-278.41	FER1	VaccDscaff34-snap-gene-278.41	FER1	VaccDscaff5-augustus-gene-192.33	FER1	VaccDscaff34-snap-gene-278.41	FER1	VaccDscaff86-augustus-gene-5.56	OPT3	VaccDscaff29-augustus-gene-44.30	SIG5
VaccDscaff1-augustus-gene-237.23	FER1	VaccDscaff5-augustus-gene-192.33	FER1	VaccDscaff1-augustus-gene-237.23	FER1	VaccDscaff5-augustus-gene-192.33	FER1	VaccDscaff5-augustus-gene-192.33	FER1	VaccDscaff1-augustus-gene-237.23	FER1	VaccDscaff5-augustus-gene-192.33	FER1	VaccDscaff33-augustus-gene-216.27	FER2	VaccDscaff34-snap-gene-278.41	FER1
VaccDscaff29-augustus-gene-121.23	FER2	VaccDscaff1-augustus-gene-237.23	FER1	VaccDscaff29-augustus-gene-121.23	FER2	VaccDscaff1-augustus-gene-237.23	FER1	VaccDscaff1-augustus-gene-237.23	FER1	VaccDscaff29-augustus-gene-121.23	FER2	VaccDscaff1-augustus-gene-237.23	FER1	VaccDscaff34-snap-gene-278.41	FER1	VaccDscaff5-augustus-gene-192.33	FER1
		VaccDscaff29-augustus-gene-121.23	FER2			VaccDscaff29-augustus-gene-121.23	FER2	VaccDscaff29-augustus-gene-121.23	FER2			VaccDscaff29-augustus-gene-121.23	FER2	VaccDscaff5-augustus-gene-192.33	FER1	VaccDscaff1-augustus-gene-237.23	FER1
												VaccDscaff6-augustus-gene-2.40	ZIP1	VaccDscaff1-augustus-gene-237.23	FER1	VaccDscaff29-augustus-gene-121.23	FER2
														VaccDscaff29-augustus-gene-121.23	FER2
