# Supplementary material for: Supplementary Low Far-Red Light Promotes Proliferation and Photosynthetic Capacity of Blueberry In Vitro Plantlets
Source: Int J Mol Sci. 2024 Jan 5;25(2):688. doi: 10.3390/ijms25020688 (PMC10815622; doi:10.3390/ijms25020688)
Supplement: Supplementary file 1 [file ijms-25-00688-s001.zip › Supplementary Materials/Table S10 leaf_yellow_GO.xls]

Class	GO_Name	GO_ID	GO_Level	P_value	EnrichmentScore	HitsGenesCountsInSelectedSet	HitsGenesCountsInBackground	AllGenesCountsInSelectedSet	AllGenesCountsInBackground	GenesOfSelectedSetInGOterm	corrected p-value(BH method)
Molecular function	glucosyltransferase activity	GO:0046527	6	0.0015983501346793494	3.658950147223068	8	804	98	36037	VaccDscaff13-processed-gene-70.2,VaccDscaff47-snap-gene-118.36,VaccDscaff43-snap-gene-82.23,VaccDscaff43-snap-gene-82.25,VaccDscaff30-augustus-gene-323.30,VaccDscaff36-snap-gene-205.36,VaccDscaff12-processed-gene-300.7,VaccDscaff35-snap-gene-152.30,	0.04203660854206689
Molecular function	catalytic activity	GO:0003824	2	0.0019621141522206953	1.2459957299311084	72	21249	98	36037	VaccDscaff28-snap-gene-55.36,VaccDscaff37-augustus-gene-159.29,VaccDscaff29-snap-gene-311.58,VaccDscaff464-snap-gene-0.16,VaccDscaff26-snap-gene-324.58,VaccDscaff32-processed-gene-198.25,VaccDscaff9-snap-gene-310.41,VaccDscaff13-augustus-gene-11.33,VaccDscaff1-augustus-gene-187.25,VaccDscaff2-snap-gene-51.32,VaccDscaff13-processed-gene-70.2,VaccDscaff121-augustus-gene-0.25,VaccDscaff28-snap-gene-…	0.03685971585957449
Molecular function	quercetin 3-O-glucosyltransferase activity	GO:0080043	8	0.0020510287747453892	4.586999872714158	6	481	98	36037	VaccDscaff13-processed-gene-70.2,VaccDscaff47-snap-gene-118.36,VaccDscaff43-snap-gene-82.23,VaccDscaff43-snap-gene-82.25,VaccDscaff30-augustus-gene-323.30,VaccDscaff12-processed-gene-300.7,	0.035961371183869155
Molecular function	quercetin 7-O-glucosyltransferase activity	GO:0080044	8	0.0020510287747453892	4.586999872714158	6	481	98	36037	VaccDscaff13-processed-gene-70.2,VaccDscaff47-snap-gene-118.36,VaccDscaff43-snap-gene-82.23,VaccDscaff43-snap-gene-82.25,VaccDscaff30-augustus-gene-323.30,VaccDscaff12-processed-gene-300.7,	0.035961371183869155
Molecular function	null	GO:0004553	0	0.00437573188011442	3.4412719633307867	7	748	98	36037	VaccDscaff32-processed-gene-198.25,VaccDscaff43-processed-gene-8.8,VaccDscaff42-augustus-gene-96.24,VaccDscaff47-snap-gene-115.26,VaccDscaff30-snap-gene-209.40,VaccDscaff47-augustus-gene-189.30,VaccDscaff8-augustus-gene-397.47,	0.060569341287899606
Molecular function	glycosyltransferase activity	GO:0016757	4	0.006203508744416442	2.5307948368611037	10	1453	98	36037	VaccDscaff13-processed-gene-70.2,VaccDscaff47-snap-gene-118.36,VaccDscaff22-augustus-gene-145.21,VaccDscaff43-snap-gene-82.23,VaccDscaff43-snap-gene-82.25,VaccDscaff30-augustus-gene-323.30,VaccDscaff36-snap-gene-205.36,VaccDscaff39-augustus-gene-36.27,VaccDscaff12-processed-gene-300.7,VaccDscaff35-snap-gene-152.30,	0.06526091199126097
Molecular function	null	GO:0016798	4	0.007744466296687347	3.0901217629909103	7	833	98	36037	VaccDscaff32-processed-gene-198.25,VaccDscaff43-processed-gene-8.8,VaccDscaff42-augustus-gene-96.24,VaccDscaff47-snap-gene-115.26,VaccDscaff30-snap-gene-209.40,VaccDscaff47-augustus-gene-189.30,VaccDscaff8-augustus-gene-397.47,	0.07833825523187586
Molecular function	hexosyltransferase activity	GO:0016758	5	0.008091043638303708	2.589609083069848	9	1278	98	36037	VaccDscaff13-processed-gene-70.2,VaccDscaff47-snap-gene-118.36,VaccDscaff43-snap-gene-82.23,VaccDscaff43-snap-gene-82.25,VaccDscaff30-augustus-gene-323.30,VaccDscaff36-snap-gene-205.36,VaccDscaff39-augustus-gene-36.27,VaccDscaff12-processed-gene-300.7,VaccDscaff35-snap-gene-152.30,	0.07599801703120981
Molecular function	UDP-glucosyltransferase activity	GO:0035251	7	0.010835330756311712	3.2398633462195447	6	681	98	36037	VaccDscaff13-processed-gene-70.2,VaccDscaff47-snap-gene-118.36,VaccDscaff43-snap-gene-82.23,VaccDscaff43-snap-gene-82.25,VaccDscaff30-augustus-gene-323.30,VaccDscaff12-processed-gene-300.7,	0.08905287465343688
Molecular function	UDP-glycosyltransferase activity	GO:0008194	5	0.011015006157552798	2.8857303010890454	7	892	98	36037	VaccDscaff13-processed-gene-70.2,VaccDscaff47-snap-gene-118.36,VaccDscaff43-snap-gene-82.23,VaccDscaff43-snap-gene-82.25,VaccDscaff30-augustus-gene-323.30,VaccDscaff39-augustus-gene-36.27,VaccDscaff12-processed-gene-300.7,	0.087786261195042
Molecular function	monooxygenase activity	GO:0004497	4	0.026324609056309733	2.6486757968493517	6	833	98	36037	VaccDscaff43-snap-gene-242.27,VaccDscaff23-processed-gene-327.10,VaccDscaff7-augustus-gene-342.29,VaccDscaff12-augustus-gene-84.45,VaccDscaff40-processed-gene-15.17,VaccDscaff16-snap-gene-83.26,	0.16484219480498713
Molecular function	oxidoreductase activity	GO:0016491	3	0.046857628479350266	1.628643738419126	14	3161	98	36037	VaccDscaff37-augustus-gene-159.29,VaccDscaff464-snap-gene-0.16,VaccDscaff43-snap-gene-242.27,VaccDscaff23-processed-gene-327.10,VaccDscaff33-augustus-gene-237.45,VaccDscaff7-augustus-gene-342.29,VaccDscaff89-augustus-gene-5.67,VaccDscaff21-snap-gene-74.26,VaccDscaff34-augustus-gene-249.38,VaccDscaff20-augustus-gene-26.26,VaccDscaff12-augustus-gene-84.45,VaccDscaff6-augustus-gene-205.31,VaccDscaff…	0.23251993000130416
Cellular component	cell periphery	GO:0071944	3	0.02312230074124333	1.3517322284956441	37	11098	103	41761	VaccDscaff2-processed-gene-17.4,VaccDscaff27-snap-gene-12.47,VaccDscaff48-augustus-gene-83.40,VaccDscaff464-snap-gene-0.16,VaccDscaff5-augustus-gene-43.25,VaccDscaff32-processed-gene-198.25,VaccDscaff9-snap-gene-310.41,VaccDscaff4-augustus-gene-375.36,VaccDscaff2-snap-gene-51.32,VaccDscaff40-processed-gene-280.9,VaccDscaff6-augustus-gene-287.24,VaccDscaff44-snap-gene-206.29,VaccDscaff34-augustus-…	1
Cellular component	cell wall	GO:0005618	4	0.04752163881565219	1.9025127306964171	9	1918	103	41761	VaccDscaff48-augustus-gene-83.40,VaccDscaff19-augustus-gene-32.35,VaccDscaff7-augustus-gene-359.21,VaccDscaff34-processed-gene-65.14,VaccDscaff20-augustus-gene-33.37,VaccDscaff36-snap-gene-205.36,VaccDscaff19-snap-gene-32.42,VaccDscaff35-snap-gene-152.30,VaccDscaff8-augustus-gene-397.47,	1
Biological process	response to light stimulus	GO:0009416	5	1.0927054572285044E-7	3.5282187529733804	23	2397	114	41918	VaccDscaff9-snap-gene-310.41,VaccDscaff13-augustus-gene-11.33,VaccDscaff6-augustus-gene-247.26,VaccDscaff30-augustus-gene-315.14,VaccDscaff3-processed-gene-167.17,VaccDscaff3-snap-gene-167.42,VaccDscaff30-augustus-gene-267.30,VaccDscaff3-augustus-gene-163.12,VaccDscaff32-augustus-gene-272.20,VaccDscaff2-augustus-gene-270.35,VaccDscaff33-augustus-gene-237.45,VaccDscaff7-augustus-gene-342.29,VaccDs…	1.1648240174055857E-4
Biological process	response to radiation	GO:0009314	4	3.9844100374608615E-7	3.279232396617756	23	2579	114	41918	VaccDscaff9-snap-gene-310.41,VaccDscaff13-augustus-gene-11.33,VaccDscaff6-augustus-gene-247.26,VaccDscaff30-augustus-gene-315.14,VaccDscaff3-processed-gene-167.17,VaccDscaff3-snap-gene-167.42,VaccDscaff30-augustus-gene-267.30,VaccDscaff3-augustus-gene-163.12,VaccDscaff32-augustus-gene-272.20,VaccDscaff2-augustus-gene-270.35,VaccDscaff33-augustus-gene-237.45,VaccDscaff7-augustus-gene-342.29,VaccDs…	2.1236905499666392E-4
Biological process	syncytium formation	GO:0006949	4	1.6475669438742457E-6	25.534844054580898	5	72	114	41918	VaccDscaff48-augustus-gene-83.40,VaccDscaff19-augustus-gene-32.35,VaccDscaff7-augustus-gene-359.21,VaccDscaff20-augustus-gene-33.37,VaccDscaff19-snap-gene-32.42,	4.390765905424865E-4
Biological process	response to light intensity	GO:0009642	6	3.83773585721503E-6	6.450907971683594	10	570	114	41918	VaccDscaff13-augustus-gene-11.33,VaccDscaff30-augustus-gene-267.30,VaccDscaff7-augustus-gene-342.29,VaccDscaff42-augustus-gene-50.27,VaccDscaff22-augustus-gene-294.17,VaccDscaff43-augustus-gene-88.21,VaccDscaff36-snap-gene-205.36,VaccDscaff16-snap-gene-83.26,VaccDscaff47-augustus-gene-111.19,VaccDscaff35-snap-gene-152.30,	5.844323462558888E-4
Biological process	response to toxic substance	GO:0009636	4	8.294975108791292E-6	4.413779138520354	13	1083	114	41918	VaccDscaff32-processed-gene-198.25,VaccDscaff13-augustus-gene-11.33,VaccDscaff1-augustus-gene-187.25,VaccDscaff3-processed-gene-167.17,VaccDscaff3-snap-gene-167.42,VaccDscaff30-augustus-gene-267.30,VaccDscaff2-augustus-gene-270.35,VaccDscaff33-augustus-gene-237.45,VaccDscaff42-augustus-gene-96.24,VaccDscaff42-augustus-gene-50.27,VaccDscaff30-snap-gene-209.40,VaccDscaff12-processed-gene-300.7,Vacc…	8.038584969065015E-4
Biological process	cellular response to starvation	GO:0009267	7	2.62059154995109E-5	5.836535783904205	9	567	114	41918	VaccDscaff13-augustus-gene-11.33,VaccDscaff30-augustus-gene-267.30,VaccDscaff15-augustus-gene-375.37,VaccDscaff42-augustus-gene-50.27,VaccDscaff22-augustus-gene-294.17,VaccDscaff43-augustus-gene-88.21,VaccDscaff23-augustus-gene-116.28,VaccDscaff39-augustus-gene-36.27,VaccDscaff47-augustus-gene-111.19,	0.0017459691201549138
Biological process	response to starvation	GO:0042594	6	5.626581690310051E-5	5.286446948041029	9	626	114	41918	VaccDscaff13-augustus-gene-11.33,VaccDscaff30-augustus-gene-267.30,VaccDscaff15-augustus-gene-375.37,VaccDscaff42-augustus-gene-50.27,VaccDscaff22-augustus-gene-294.17,VaccDscaff43-augustus-gene-88.21,VaccDscaff23-augustus-gene-116.28,VaccDscaff39-augustus-gene-36.27,VaccDscaff47-augustus-gene-111.19,	0.0035281976952179495
Biological process	cellular response to extracellular stimulus	GO:0031668	5	6.375072635511625E-5	4.642698919014708	10	792	114	41918	VaccDscaff9-snap-gene-310.41,VaccDscaff13-augustus-gene-11.33,VaccDscaff30-augustus-gene-267.30,VaccDscaff15-augustus-gene-375.37,VaccDscaff42-augustus-gene-50.27,VaccDscaff22-augustus-gene-294.17,VaccDscaff43-augustus-gene-88.21,VaccDscaff23-augustus-gene-116.28,VaccDscaff39-augustus-gene-36.27,VaccDscaff47-augustus-gene-111.19,	0.0037754596830307735
Biological process	cellular response to external stimulus	GO:0071496	4	1.0437382730921207E-4	4.372196841688049	10	841	114	41918	VaccDscaff9-snap-gene-310.41,VaccDscaff13-augustus-gene-11.33,VaccDscaff30-augustus-gene-267.30,VaccDscaff15-augustus-gene-375.37,VaccDscaff42-augustus-gene-50.27,VaccDscaff22-augustus-gene-294.17,VaccDscaff43-augustus-gene-88.21,VaccDscaff23-augustus-gene-116.28,VaccDscaff39-augustus-gene-36.27,VaccDscaff47-augustus-gene-111.19,	0.005057386359619095
Biological process	cellular response to nutrient levels	GO:0031669	6	1.1635108830676533E-4	4.80307081200825	9	689	114	41918	VaccDscaff13-augustus-gene-11.33,VaccDscaff30-augustus-gene-267.30,VaccDscaff15-augustus-gene-375.37,VaccDscaff42-augustus-gene-50.27,VaccDscaff22-augustus-gene-294.17,VaccDscaff43-augustus-gene-88.21,VaccDscaff23-augustus-gene-116.28,VaccDscaff39-augustus-gene-36.27,VaccDscaff47-augustus-gene-111.19,	0.005167927505625493
Biological process	cellular modified amino acid metabolic process	GO:0006575	5	1.2042123706157426E-4	7.907564610450858	6	279	114	41918	VaccDscaff13-augustus-gene-11.33,VaccDscaff3-processed-gene-167.17,VaccDscaff3-snap-gene-167.42,VaccDscaff30-augustus-gene-267.30,VaccDscaff2-augustus-gene-270.35,VaccDscaff42-augustus-gene-50.27,	0.005134761548305527
Biological process	response to absence of light	GO:0009646	7	1.5000151598121292E-4	10.04649602147445	5	183	114	41918	VaccDscaff7-augustus-gene-342.29,VaccDscaff22-augustus-gene-294.17,VaccDscaff43-augustus-gene-88.21,VaccDscaff16-snap-gene-83.26,VaccDscaff47-augustus-gene-111.19,	0.005922282075406406
Biological process	detoxification	GO:0098754	2	3.6358306113160044E-4	5.340066972410279	7	482	114	41918	VaccDscaff32-processed-gene-198.25,VaccDscaff3-processed-gene-167.17,VaccDscaff3-snap-gene-167.42,VaccDscaff2-augustus-gene-270.35,VaccDscaff33-augustus-gene-237.45,VaccDscaff42-augustus-gene-96.24,VaccDscaff30-snap-gene-209.40,	0.010766098421285723
Biological process	response to abiotic stimulus	GO:0009628	3	4.0880150785926883E-4	1.7516757048467093	35	7347	114	41918	VaccDscaff5-augustus-gene-43.25,VaccDscaff9-snap-gene-310.41,VaccDscaff13-augustus-gene-11.33,VaccDscaff6-augustus-gene-247.26,VaccDscaff28-snap-gene-37.26,VaccDscaff30-augustus-gene-315.14,VaccDscaff34-augustus-gene-177.18,VaccDscaff4-snap-gene-148.46,VaccDscaff12-snap-gene-43.32,VaccDscaff3-processed-gene-167.17,VaccDscaff3-snap-gene-167.42,VaccDscaff30-augustus-gene-267.30,VaccDscaff3-augustus…	0.011777902902107583
Biological process	response to extracellular stimulus	GO:0009991	4	6.99960646646014E-4	3.436464994261354	10	1070	114	41918	VaccDscaff9-snap-gene-310.41,VaccDscaff13-augustus-gene-11.33,VaccDscaff30-augustus-gene-267.30,VaccDscaff15-augustus-gene-375.37,VaccDscaff42-augustus-gene-50.27,VaccDscaff22-augustus-gene-294.17,VaccDscaff43-augustus-gene-88.21,VaccDscaff23-augustus-gene-116.28,VaccDscaff39-augustus-gene-36.27,VaccDscaff47-augustus-gene-111.19,	0.01865395123311627
Biological process	cellular response to phosphate starvation	GO:0016036	8	7.742854592528436E-4	7.017209053167269	5	262	114	41918	VaccDscaff13-augustus-gene-11.33,VaccDscaff30-augustus-gene-267.30,VaccDscaff42-augustus-gene-50.27,VaccDscaff23-augustus-gene-116.28,VaccDscaff39-augustus-gene-36.27,	0.01965210237056027
Biological process	response to nutrient levels	GO:0031667	5	0.0011741072548048237	3.4871610004991402	9	949	114	41918	VaccDscaff13-augustus-gene-11.33,VaccDscaff30-augustus-gene-267.30,VaccDscaff15-augustus-gene-375.37,VaccDscaff42-augustus-gene-50.27,VaccDscaff22-augustus-gene-294.17,VaccDscaff43-augustus-gene-88.21,VaccDscaff23-augustus-gene-116.28,VaccDscaff39-augustus-gene-36.27,VaccDscaff47-augustus-gene-111.19,	0.02607496528379046
Biological process	alpha-amino acid biosynthetic process	GO:1901607	9	0.0015742705075406649	4.848814343551185	6	455	114	41918	VaccDscaff28-snap-gene-37.26,VaccDscaff10-snap-gene-210.36,VaccDscaff28-snap-gene-269.36,VaccDscaff22-augustus-gene-294.17,VaccDscaff43-augustus-gene-88.21,VaccDscaff47-augustus-gene-111.19,	0.03227254540458363
Biological process	glycerophospholipid metabolic process	GO:0006650	7	0.0022243383474720435	5.521047363152626	5	333	114	41918	VaccDscaff13-augustus-gene-11.33,VaccDscaff121-augustus-gene-0.25,VaccDscaff12-snap-gene-43.32,VaccDscaff30-augustus-gene-267.30,VaccDscaff42-augustus-gene-50.27,	0.04234186925723569
Biological process	response to red or far red light	GO:0009639	6	0.002435540770644118	3.8416601204503795	7	670	114	41918	VaccDscaff6-augustus-gene-247.26,VaccDscaff30-augustus-gene-315.14,VaccDscaff3-processed-gene-167.17,VaccDscaff3-snap-gene-167.42,VaccDscaff32-augustus-gene-272.20,VaccDscaff2-augustus-gene-270.35,VaccDscaff21-snap-gene-74.26,	0.04554888528958999
Biological process	catabolic process	GO:0009056	3	0.0025160064428081386	1.855042849501468	23	4559	114	41918	VaccDscaff2-processed-gene-17.4,VaccDscaff28-snap-gene-55.36,VaccDscaff32-processed-gene-198.25,VaccDscaff1-augustus-gene-187.25,VaccDscaff121-augustus-gene-0.25,VaccDscaff29-augustus-gene-312.19,VaccDscaff23-augustus-gene-311.40,VaccDscaff28-snap-gene-269.36,VaccDscaff4-snap-gene-148.46,VaccDscaff3-processed-gene-167.17,VaccDscaff3-snap-gene-167.42,VaccDscaff2-augustus-gene-270.35,VaccDscaff42-a…	0.04624246324195647
Biological process	response to oxygen-containing compound	GO:1901700	4	0.00259847103017119	1.6703592718926328	30	6604	114	41918	VaccDscaff2-processed-gene-17.4,VaccDscaff4-augustus-gene-398.15,VaccDscaff9-snap-gene-310.41,VaccDscaff13-augustus-gene-11.33,VaccDscaff1-augustus-gene-187.25,VaccDscaff4-augustus-gene-375.36,VaccDscaff28-snap-gene-37.26,VaccDscaff29-augustus-gene-312.19,VaccDscaff13-snap-gene-78.43,VaccDscaff46-augustus-gene-146.28,VaccDscaff34-augustus-gene-177.18,VaccDscaff12-snap-gene-43.32,VaccDscaff3-proce…	0.04694864607055065
Biological process	amino acid biosynthetic process	GO:0008652	8	0.003144737092860561	4.218375767334205	6	523	114	41918	VaccDscaff28-snap-gene-37.26,VaccDscaff10-snap-gene-210.36,VaccDscaff28-snap-gene-269.36,VaccDscaff22-augustus-gene-294.17,VaccDscaff43-augustus-gene-88.21,VaccDscaff47-augustus-gene-111.19,	0.05495556952441571
Biological process	secondary metabolic process	GO:0019748	3	0.00461353405717102	2.652970810865548	10	1386	114	41918	VaccDscaff1-augustus-gene-187.25,VaccDscaff3-processed-gene-167.17,VaccDscaff3-snap-gene-167.42,VaccDscaff23-processed-gene-327.10,VaccDscaff2-augustus-gene-270.35,VaccDscaff89-augustus-gene-5.67,VaccDscaff39-augustus-gene-61.32,VaccDscaff12-augustus-gene-84.45,VaccDscaff40-processed-gene-15.17,VaccDscaff12-processed-gene-300.7,	0.0768441766397548
Biological process	hormone biosynthetic process	GO:0042446	6	0.007910266246167419	3.0862257562371154	7	834	114	41918	VaccDscaff28-snap-gene-37.26,VaccDscaff46-augustus-gene-146.28,VaccDscaff43-snap-gene-242.27,VaccDscaff7-augustus-gene-342.29,VaccDscaff21-snap-gene-74.26,VaccDscaff22-snap-gene-254.43,VaccDscaff16-snap-gene-83.26,	0.11711588636686761
Biological process	response to inorganic substance	GO:0010035	4	0.011200020634532848	1.7864052844662262	18	3705	114	41918	VaccDscaff32-processed-gene-198.25,VaccDscaff9-snap-gene-310.41,VaccDscaff13-augustus-gene-11.33,VaccDscaff4-augustus-gene-375.36,VaccDscaff28-snap-gene-37.26,VaccDscaff34-augustus-gene-177.18,VaccDscaff3-processed-gene-167.17,VaccDscaff3-snap-gene-167.42,VaccDscaff30-augustus-gene-267.30,VaccDscaff2-augustus-gene-270.35,VaccDscaff33-augustus-gene-237.45,VaccDscaff42-augustus-gene-96.24,VaccDscaf…	0.137232436740368
Biological process	glycerolipid metabolic process	GO:0046486	6	0.011646504003236968	3.7066709111488394	5	496	114	41918	VaccDscaff13-augustus-gene-11.33,VaccDscaff121-augustus-gene-0.25,VaccDscaff12-snap-gene-43.32,VaccDscaff30-augustus-gene-267.30,VaccDscaff42-augustus-gene-50.27,	0.14108151440284783
Biological process	cellular catabolic process	GO:0044248	4	0.011960410213682549	1.739624833997344	19	4016	114	41918	VaccDscaff2-processed-gene-17.4,VaccDscaff32-processed-gene-198.25,VaccDscaff1-augustus-gene-187.25,VaccDscaff121-augustus-gene-0.25,VaccDscaff29-augustus-gene-312.19,VaccDscaff28-snap-gene-269.36,VaccDscaff4-snap-gene-148.46,VaccDscaff3-processed-gene-167.17,VaccDscaff3-snap-gene-167.42,VaccDscaff2-augustus-gene-270.35,VaccDscaff42-augustus-gene-96.24,VaccDscaff29-augustus-gene-171.20,VaccDscaff…	0.14325614930096175
Biological process	organic substance catabolic process	GO:1901575	4	0.013510938889861213	1.718232497130677	19	4066	114	41918	VaccDscaff2-processed-gene-17.4,VaccDscaff28-snap-gene-55.36,VaccDscaff32-processed-gene-198.25,VaccDscaff1-augustus-gene-187.25,VaccDscaff121-augustus-gene-0.25,VaccDscaff29-augustus-gene-312.19,VaccDscaff23-augustus-gene-311.40,VaccDscaff28-snap-gene-269.36,VaccDscaff4-snap-gene-148.46,VaccDscaff42-augustus-gene-96.24,VaccDscaff29-augustus-gene-171.20,VaccDscaff22-augustus-gene-294.17,VaccDscaf…	0.16002956507324503
Biological process	small molecule biosynthetic process	GO:0044283	4	0.013514896518947772	2.065740193179578	12	2136	114	41918	VaccDscaff13-augustus-gene-11.33,VaccDscaff28-snap-gene-37.26,VaccDscaff46-augustus-gene-146.28,VaccDscaff10-snap-gene-210.36,VaccDscaff28-snap-gene-269.36,VaccDscaff30-augustus-gene-267.30,VaccDscaff42-augustus-gene-50.27,VaccDscaff21-snap-gene-74.26,VaccDscaff22-snap-gene-254.43,VaccDscaff22-augustus-gene-294.17,VaccDscaff43-augustus-gene-88.21,VaccDscaff47-augustus-gene-111.19,	0.1583173592219596
Biological process	alpha-amino acid metabolic process	GO:1901605	8	0.013822294538037627	3.077002128752844	6	717	114	41918	VaccDscaff28-snap-gene-37.26,VaccDscaff10-snap-gene-210.36,VaccDscaff28-snap-gene-269.36,VaccDscaff22-augustus-gene-294.17,VaccDscaff43-augustus-gene-88.21,VaccDscaff47-augustus-gene-111.19,	0.16015832584291423
Biological process	hormone metabolic process	GO:0042445	5	0.01596052497485756	2.478192110436158	8	1187	114	41918	VaccDscaff28-snap-gene-37.26,VaccDscaff46-augustus-gene-146.28,VaccDscaff43-snap-gene-242.27,VaccDscaff7-augustus-gene-342.29,VaccDscaff21-snap-gene-74.26,VaccDscaff22-snap-gene-254.43,VaccDscaff22-augustus-gene-145.21,VaccDscaff16-snap-gene-83.26,	0.17909389077050694
Biological process	response to stimulus	GO:0050896	2	0.016795089111030337	1.2180443580342142	66	19924	114	41918	VaccDscaff2-processed-gene-17.4,VaccDscaff4-augustus-gene-398.15,VaccDscaff45-snap-gene-181.34,VaccDscaff5-augustus-gene-43.25,VaccDscaff32-processed-gene-198.25,VaccDscaff9-snap-gene-310.41,VaccDscaff13-augustus-gene-11.33,VaccDscaff1-augustus-gene-187.25,VaccDscaff4-augustus-gene-375.36,VaccDscaff6-augustus-gene-247.26,VaccDscaff28-snap-gene-37.26,VaccDscaff29-augustus-gene-312.19,VaccDscaff24-…	0.18649546867039937
Biological process	regulation of flower development	GO:0009909	7	0.018306648302981454	2.8877101129787817	6	764	114	41918	VaccDscaff30-augustus-gene-315.14,VaccDscaff47-snap-gene-118.36,VaccDscaff32-augustus-gene-272.20,VaccDscaff43-snap-gene-82.23,VaccDscaff43-snap-gene-82.25,VaccDscaff3-processed-gene-113.10,	0.1991315009283493
Biological process	response to stress	GO:0006950	3	0.01947960283251604	1.342933540871598	41	11226	114	41918	VaccDscaff4-augustus-gene-398.15,VaccDscaff45-snap-gene-181.34,VaccDscaff5-augustus-gene-43.25,VaccDscaff32-processed-gene-198.25,VaccDscaff9-snap-gene-310.41,VaccDscaff13-augustus-gene-11.33,VaccDscaff4-augustus-gene-375.36,VaccDscaff28-snap-gene-37.26,VaccDscaff29-augustus-gene-312.19,VaccDscaff3-augustus-gene-173.14,VaccDscaff34-augustus-gene-177.18,VaccDscaff15-augustus-gene-182.25,VaccDscaff…	0.19227089462464908
Biological process	secondary metabolite biosynthetic process	GO:0044550	4	0.019680949648927193	2.5739122807017543	7	1000	114	41918	VaccDscaff1-augustus-gene-187.25,VaccDscaff23-processed-gene-327.10,VaccDscaff89-augustus-gene-5.67,VaccDscaff39-augustus-gene-61.32,VaccDscaff12-augustus-gene-84.45,VaccDscaff40-processed-gene-15.17,VaccDscaff12-processed-gene-300.7,	0.19072629387051263
Biological process	phospholipid metabolic process	GO:0006644	6	0.02015404374230545	3.219805204780778	5	571	114	41918	VaccDscaff13-augustus-gene-11.33,VaccDscaff121-augustus-gene-0.25,VaccDscaff12-snap-gene-43.32,VaccDscaff30-augustus-gene-267.30,VaccDscaff42-augustus-gene-50.27,	0.19355144711078928
Biological process	anatomical structure development	GO:0048856	3	0.020223321826052687	1.339830423909044	41	11252	114	41918	VaccDscaff2-processed-gene-17.4,VaccDscaff48-augustus-gene-83.40,VaccDscaff32-processed-gene-198.25,VaccDscaff9-snap-gene-310.41,VaccDscaff13-augustus-gene-11.33,VaccDscaff28-snap-gene-37.26,VaccDscaff29-augustus-gene-312.19,VaccDscaff43-processed-gene-8.8,VaccDscaff30-augustus-gene-315.14,VaccDscaff43-snap-gene-242.27,VaccDscaff11-augustus-gene-260.34,VaccDscaff18-snap-gene-5.48,VaccDscaff47-sna…	0.19248268809439434
Biological process	macromolecule catabolic process	GO:0009057	5	0.021483598446034646	1.819662269849243	14	2829	114	41918	VaccDscaff2-processed-gene-17.4,VaccDscaff28-snap-gene-55.36,VaccDscaff32-processed-gene-198.25,VaccDscaff1-augustus-gene-187.25,VaccDscaff29-augustus-gene-312.19,VaccDscaff23-augustus-gene-311.40,VaccDscaff4-snap-gene-148.46,VaccDscaff42-augustus-gene-96.24,VaccDscaff29-augustus-gene-171.20,VaccDscaff1-snap-gene-159.20,VaccDscaff30-snap-gene-209.40,VaccDscaff34-snap-gene-257.58,VaccDscaff12-augu…	0.2008904907322187
Biological process	obsolete cellular carbohydrate metabolic process	GO:0044262	0	0.02553605775117318	2.437416932482722	7	1056	114	41918	VaccDscaff32-processed-gene-198.25,VaccDscaff13-augustus-gene-11.33,VaccDscaff3-augustus-gene-173.14,VaccDscaff30-augustus-gene-267.30,VaccDscaff42-augustus-gene-96.24,VaccDscaff42-augustus-gene-50.27,VaccDscaff30-snap-gene-209.40,	0.21777150050200486
Biological process	organic hydroxy compound biosynthetic process	GO:1901617	5	0.02765500017917555	2.6233181050128294	6	841	114	41918	VaccDscaff13-augustus-gene-11.33,VaccDscaff43-snap-gene-242.27,VaccDscaff30-augustus-gene-267.30,VaccDscaff7-augustus-gene-342.29,VaccDscaff42-augustus-gene-50.27,VaccDscaff16-snap-gene-83.26,	0.22503992512214607
Biological process	carboxylic acid biosynthetic process	GO:0046394	7	0.02934997622234925	2.085265147746493	9	1587	114	41918	VaccDscaff28-snap-gene-37.26,VaccDscaff46-augustus-gene-146.28,VaccDscaff10-snap-gene-210.36,VaccDscaff28-snap-gene-269.36,VaccDscaff21-snap-gene-74.26,VaccDscaff22-snap-gene-254.43,VaccDscaff22-augustus-gene-294.17,VaccDscaff43-augustus-gene-88.21,VaccDscaff47-augustus-gene-111.19,	0.23348563173898731
Biological process	organic acid biosynthetic process	GO:0016053	5	0.02934997622234925	2.085265147746493	9	1587	114	41918	VaccDscaff28-snap-gene-37.26,VaccDscaff46-augustus-gene-146.28,VaccDscaff10-snap-gene-210.36,VaccDscaff28-snap-gene-269.36,VaccDscaff21-snap-gene-74.26,VaccDscaff22-snap-gene-254.43,VaccDscaff22-augustus-gene-294.17,VaccDscaff43-augustus-gene-88.21,VaccDscaff47-augustus-gene-111.19,	0.23348563173898731
Biological process	response to acid chemical	GO:0001101	4	0.030182855448842916	1.5770504138449961	19	4430	114	41918	VaccDscaff2-processed-gene-17.4,VaccDscaff4-augustus-gene-398.15,VaccDscaff9-snap-gene-310.41,VaccDscaff1-augustus-gene-187.25,VaccDscaff4-augustus-gene-375.36,VaccDscaff28-snap-gene-37.26,VaccDscaff29-augustus-gene-312.19,VaccDscaff13-snap-gene-78.43,VaccDscaff46-augustus-gene-146.28,VaccDscaff34-augustus-gene-177.18,VaccDscaff3-processed-gene-167.17,VaccDscaff3-snap-gene-167.42,VaccDscaff2-augu…	0.22343697158657325
Biological process	developmental process	GO:0032502	2	0.03459095953721136	1.288351854860309	42	11987	114	41918	VaccDscaff2-processed-gene-17.4,VaccDscaff48-augustus-gene-83.40,VaccDscaff32-processed-gene-198.25,VaccDscaff9-snap-gene-310.41,VaccDscaff13-augustus-gene-11.33,VaccDscaff28-snap-gene-37.26,VaccDscaff29-augustus-gene-312.19,VaccDscaff43-processed-gene-8.8,VaccDscaff30-augustus-gene-315.14,VaccDscaff43-snap-gene-242.27,VaccDscaff11-augustus-gene-260.34,VaccDscaff18-snap-gene-5.48,VaccDscaff47-sna…	0.2458264191111154
Biological process	response to salt	GO:1902074	4	0.04812961824865991	1.9008132047522597	9	1741	114	41918	VaccDscaff9-snap-gene-310.41,VaccDscaff4-augustus-gene-375.36,VaccDscaff34-augustus-gene-177.18,VaccDscaff3-processed-gene-167.17,VaccDscaff3-snap-gene-167.42,VaccDscaff2-augustus-gene-270.35,VaccDscaff34-augustus-gene-249.38,VaccDscaff9-augustus-gene-354.23,VaccDscaff45-augustus-gene-139.21,	0.28190204974215094
