# Supplementary material for: Supplementary Low Far-Red Light Promotes Proliferation and Photosynthetic Capacity of Blueberry In Vitro Plantlets
Source: Int J Mol Sci. 2024 Jan 5;25(2):688. doi: 10.3390/ijms25020688 (PMC10815622; doi:10.3390/ijms25020688)
Supplement: Supplementary file 1 [file ijms-25-00688-s001.zip › Supplementary Materials/Table S11 leaf_yellow_go_predictions.xlsx]

## Sheet: Sheet1
response to light stimulus GO:0009416	gene predictions	response to radiation GO:0009314	gene predictions	response to red or far red light GO:0009639	gene predictions
VaccDscaff9-snap-gene-310.41	LRK10L1.1	VaccDscaff9-snap-gene-310.41	LRK10L1.1	VaccDscaff6-augustus-gene-247.26	PRR5
VaccDscaff13-augustus-gene-11.33	MIPS2	VaccDscaff13-augustus-gene-11.33	MIPS2	VaccDscaff30-augustus-gene-315.14	BBX2
VaccDscaff6-augustus-gene-247.26	PRR5	VaccDscaff6-augustus-gene-247.26	PRR5	VaccDscaff3-processed-gene-167.17	GSTU17
VaccDscaff30-augustus-gene-315.14	COL1	VaccDscaff30-augustus-gene-315.14	BBX2	VaccDscaff3-snap-gene-167.42	GSTU17
VaccDscaff3-processed-gene-167.17	GSTU17	VaccDscaff3-processed-gene-167.17	GSTU17	VaccDscaff32-augustus-gene-272.20	BBX3
VaccDscaff3-snap-gene-167.42	GSTU17	VaccDscaff3-snap-gene-167.42	GSTU17	VaccDscaff2-augustus-gene-270.35	GSTU17
VaccDscaff30-augustus-gene-267.30	MIPS2	VaccDscaff30-augustus-gene-267.30	MIPS2	VaccDscaff21-snap-gene-74.26	GA20OX1
VaccDscaff3-augustus-gene-163.12	PRE6	VaccDscaff3-augustus-gene-163.12	PRE6
VaccDscaff32-augustus-gene-272.20	col2	VaccDscaff32-augustus-gene-272.20	BBX3
VaccDscaff2-augustus-gene-270.35	GSTU17	VaccDscaff2-augustus-gene-270.35	GSTU17
VaccDscaff33-augustus-gene-237.45	FSD2	VaccDscaff33-augustus-gene-237.45	FSD2
VaccDscaff7-augustus-gene-342.29	BR6OX2	VaccDscaff7-augustus-gene-342.29	BR6OX2
VaccDscaff42-augustus-gene-50.27	MIPS2	VaccDscaff42-augustus-gene-50.27	MIPS2
VaccDscaff21-snap-gene-74.26	GA20OX1	VaccDscaff21-snap-gene-74.26	GA20OX1
VaccDscaff22-augustus-gene-294.17	ASN1	VaccDscaff22-augustus-gene-294.17	ASN1
VaccDscaff43-augustus-gene-88.21	ASN1	VaccDscaff43-augustus-gene-88.21	ASN1
VaccDscaff6-augustus-gene-205.31	NIA1	VaccDscaff6-augustus-gene-205.31	NIA1
VaccDscaff3-processed-gene-113.10	RAV1	VaccDscaff3-processed-gene-113.10	RAV1
VaccDscaff36-snap-gene-205.36	XTH5	VaccDscaff36-snap-gene-205.36	XTH5
VaccDscaff30-augustus-gene-166.15	RPA70B	VaccDscaff30-augustus-gene-166.15	RPA70B
VaccDscaff16-snap-gene-83.26	BR6OX2	VaccDscaff16-snap-gene-83.26	BR6OX2
VaccDscaff47-augustus-gene-111.19	ASN1	VaccDscaff47-augustus-gene-111.19	ASN1
VaccDscaff35-snap-gene-152.30	XTH5	VaccDscaff35-snap-gene-152.30	XTH5
