# Supplementary material for: Supplementary Low Far-Red Light Promotes Proliferation and Photosynthetic Capacity of Blueberry In Vitro Plantlets
Source: Int J Mol Sci. 2024 Jan 5;25(2):688. doi: 10.3390/ijms25020688 (PMC10815622; doi:10.3390/ijms25020688)
Supplement: Supplementary file 1 [file ijms-25-00688-s001.zip › Supplementary Materials/Table S12 phenotypic data for WGCNA.xlsx]

## Sheet: Sheet1
	Treatment	Shoot number	Shoot length	Stem diameter	Fresh weight	Dry weight	IAA	TZR	GA3	BR
stem	CK-1	5.5	37.203	1.117	123.59	17.59	71.4485	85.4035	410.331	375.2
	CK-2	6	39.59	1.143	131.85	17.58	70.6412	85.9747	427.581	378.728
	CK-3	5.6	40.046	1.124	126.38	17.17	71.5834	85.467	422.172	362.945
	6FR-1	12.5	50.198	0.977	270.84	33.1	79.3721	91.6643	439.523	396.538
	6FR-2	13.2	53.747	1	289.51	35.62	77.0222	94.6943	441.471	409.422
	6FR-3	12.4	53.926	1.0254	263.11	34.59	78.6605	92.5414	446.236	402.988
	30FR-1	5.3	47.031	0.963	177.8	22.34	48.6511	75.5199	409.255	399.984
	30FR-2	5.4	50.619	1.001	167.5	22.24	49.5761	74.1638	423.333	400.578
	30FR-3	5.1	50.828	1.008	173.62	22.11	50.1709	72.2321	409.178	406.759
	Treatment	Leaf area	Chlorophyll a	Chlorophyll b	Carotenoids	Chlorophyll a+b	Fv/Fm	Y(II)	ETR	qL	NPQ
leaf	CK-1	0.8411	0.924048	0.424452	0.366936	1.3485	0.7527	0.466	7.05	0.686	0.3363
	CK-2	0.8693	0.907911	0.382368	0.355932	1.29028	0.7532	0.4643	7.025	0.7133	0.3158
	CK-3	0.856	0.868085	0.329064	0.326843	1.19715	0.751	0.459	6.925	0.6128	0.3253
	6FR-1	1.0575	0.520468	0.217024	0.21777	0.737492	0.7618	0.4888	7.4	0.501	0.1668
	6FR-2	0.9549	0.517056	0.215647	0.215113	0.732702	0.7713	0.4978	7.525	0.489	0.1558
	6FR-3	1.0165	0.495389	0.198853	0.20735	0.694242	0.769	0.4915	7.45	0.478	0.152
	30FR-1	1.2228	0.667978	0.302874	0.277566	0.970853	0.7418	0.4172	6.3	0.5875	0.3215
	30FR-2	1.2252	0.665616	0.297144	0.268099	0.96276	0.7394	0.406	6.1	0.5828	0.3383
	30FR-3	1.2152	0.654208	0.280414	0.268378	0.934622	0.7448	0.409	6.175	0.5653	0.3265
